# Supplementary material
Source: Elsevier journal article supplement (https://hal.science/hal-03874348/file/mmc19.pdf)
Supplement: mmc19 [file mmc19.pdf]

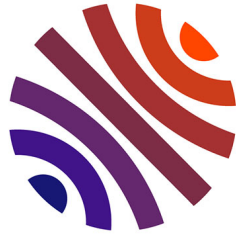

**HAL**  
open science

## Rapid assembly of a polar network architecture drives efficient actomyosin contractility

Vlad Costache, Serena Prigent Garcia, Camille N Plancke, Jing Li, Simon Begnaud, Shashi Kumar Suman, Anne-Cécile Reymann, Taeyoon Kim, François B Robin

### ► To cite this version:

Vlad Costache, Serena Prigent Garcia, Camille N Plancke, Jing Li, Simon Begnaud, et al.. Rapid assembly of a polar network architecture drives efficient actomyosin contractility. *Cell Reports*, 2022, 39 (9), pp.110868. 10.1016/j.celrep.2022.110868 . hal-03874348

**HAL Id: hal-03874348**

**<https://hal.science/hal-03874348>**

Submitted on 28 Nov 2022

**HAL** is a multi-disciplinary open access archive for the deposit and dissemination of scientific research documents, whether they are published or not. The documents may come from teaching and research institutions in France or abroad, or from public or private research centers.

L'archive ouverte pluridisciplinaire **HAL**, est destinée au dépôt et à la diffusion de documents scientifiques de niveau recherche, publiés ou non, émanant des établissements d'enseignement et de recherche français ou étrangers, des laboratoires publics ou privés.

## Rapid assembly of a polar network architecture drives efficient actomyosin contractility

### Graphical abstract

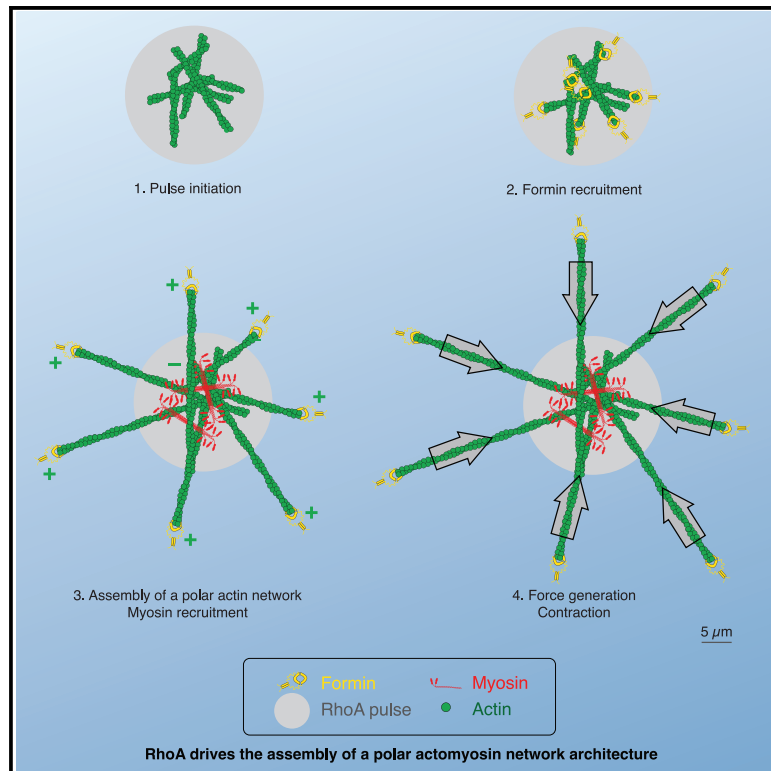

### Authors

Vlad Costache, Serena Prigent Garcia, Camille N. Plancke, ..., Anne-Cécile Reymann, Taeyoon Kim, François B. Robin

### Correspondence

kimty@purdue.edu (T.K.), francois.robin@sorbonne-universite.fr (F.B.R.)

### In brief

RhoA-driven actomyosin contractility plays a key role in driving cell and tissue contractility during morphogenesis. Tracking individual formins, Costache et al. show that the network assembled downstream of RhoA displays a polar architecture, barbed ends pointing outward, a feature that supports efficient contractility and force transmission during pulsed contractions.

### Highlights

- The formin CYK-1 drives actin network assembly downstream of RhoA pulses
- A barbed-end saturation mechanism could allow responsive F-actin assembly
- Rapid F-actin elongation results in assembly of aster-like polar actin networks
- Numerical simulations show network polarity drives efficient network contractility

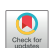

## Article

# Rapid assembly of a polar network architecture drives efficient actomyosin contractility

Vlad Costache,<sup>1,4</sup> Serena Prigent Garcia,<sup>1,4</sup> Camille N. Plancke,<sup>1</sup> Jing Li,<sup>2</sup> Simon Begnaud,<sup>1</sup> Shashi Kumar Suman,<sup>1</sup> Anne-Cécile Reymann,<sup>3</sup> Taeyoon Kim,<sup>2,\*</sup> and François B. Robin<sup>1,5,\*</sup>

<sup>1</sup>Sorbonne Université, CNRS, INSERM, Institut de Biologie Paris-Seine IBPS, Laboratoire de Biologie du Développement, Paris, France

<sup>2</sup>Weldon School of Biomedical Engineering, Purdue University, West Lafayette, IN, USA

<sup>3</sup>IGBMC, CNRS UMR7104, INSERM U1258, and Université de Strasbourg, Illkirch, France

<sup>4</sup>These authors contributed equally

<sup>5</sup>Lead contact

\*Correspondence: [kimty@purdue.edu](mailto:kimty@purdue.edu) (T.K.), [francois.robin@sorbonne-universite.fr](mailto:francois.robin@sorbonne-universite.fr) (F.B.R.)

<https://doi.org/10.1016/j.celrep.2022.110868>

## SUMMARY

Actin network architecture and dynamics play a central role in cell contractility and tissue morphogenesis. RhoA-driven pulsed contractions are a generic mode of actomyosin contractility, but the mechanisms underlying how their specific architecture emerges and how this architecture supports the contractile function of the network remain unclear. Here we show that, during pulsed contractions, the actin network is assembled by two subpopulations of formins: a functionally inactive population (recruited) and formins actively participating in actin filament elongation (elongating). We then show that elongating formins assemble a polar actin network, with barbed ends pointing out of the pulse. Numerical simulations demonstrate that this geometry favors rapid network contraction. Our results show that formins convert a local RhoA activity gradient into a polar network architecture, causing efficient network contractility, underlying the key function of kinetic controls in the assembly and mechanics of cortical network architectures.

## INTRODUCTION

Vastly conserved in eukaryotes, the actomyosin cytoskeleton is a major determinant of the mechanical properties of embryonic cells and tissues (Munjal and Lecuit, 2014). Modulation of actomyosin networks activity plays a critical role in cell shape changes, cell division, cell migration, and polarization. The integration of these behaviors, at the tissue scale, drives tissue deformation and morphogenesis (Lecuit and Lenne, 2007). At the molecular scale, however, the role of the architecture of actomyosin networks has been a research focus and subject of some debate (Blanchoin et al., 2014; Koenderink and Paluch, 2018; Agarwal and Zaidel-Bar, 2019). In muscle, the mechanisms of actomyosin contractility have historically been characterized, showing that, in this quasi-crystalline organization, the sliding of bipolar myosin II mini-filaments along actin filaments drives network contractility and sarcomere shortening. In other contexts, in contrast, and in particular at the cell cortex of developing embryos, seemingly disordered actin networks remain poorly understood in terms of network polarity, length distribution, mesh size, turnover rates, or crosslinking levels, and we still do not fully comprehend how F-actin architecture is functionally linked to network contractility. Theoretical studies (Lenz et al., 2012a, 2012b) and computational models (Kim, 2015) have shown that asymmetry between the compressive and extensive modulus—the ability to withstand tension but buckle under compressive forces—can drive contraction of disordered bundles. Similarly, numerical simulations and *in vitro* experiments

have clearly demonstrated that non-polar actin networks can contract (Yu et al., 2018). Cellular networks however, often display characteristic organization, suggesting that specific network dynamics and geometries may play a critical role in network contractility (Koenderink and Paluch, 2018).

Active Rho GTPase zones have recently emerged as essential regulators to template the architecture of the actomyosin meshwork by defining active, task-tuned zones of cytoskeletal assembly (Miller and Bement, 2009). Examples of such zones include the leading edge of migrating cells, the cleavage furrow during cell division, and the apical cortex during apical constriction. During embryonic morphogenesis in particular, a wide class of morphogenetic processes is driven by pulsed contractions, a widespread mode of actomyosin contractility where transient and iterative F-actin and myosin II accumulations accompany contraction of the actomyosin network (He et al., 2010; Kim and Davidson, 2011; Martin et al., 2009; Munro et al., 2004; Roh-Johnson et al., 2012). Previous work has shown that pulsed contractions are driven by excitable dynamics of the Rho GTPase RhoA, leading to formation of activation zones that drive recruitment of downstream effectors, including formin, Anillin, F-actin, and myosin II (Maddox et al., 2005; Munro et al., 2004; Michaux et al., 2018; Nagathan et al., 2018; Reymann et al., 2016). Excitable dynamics, with feedforward activation and delayed negative feedback, seem to play an important role to establish Rho activation (Bement et al., 2015; Nishikawa et al., 2017; Michaux et al., 2018).

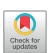

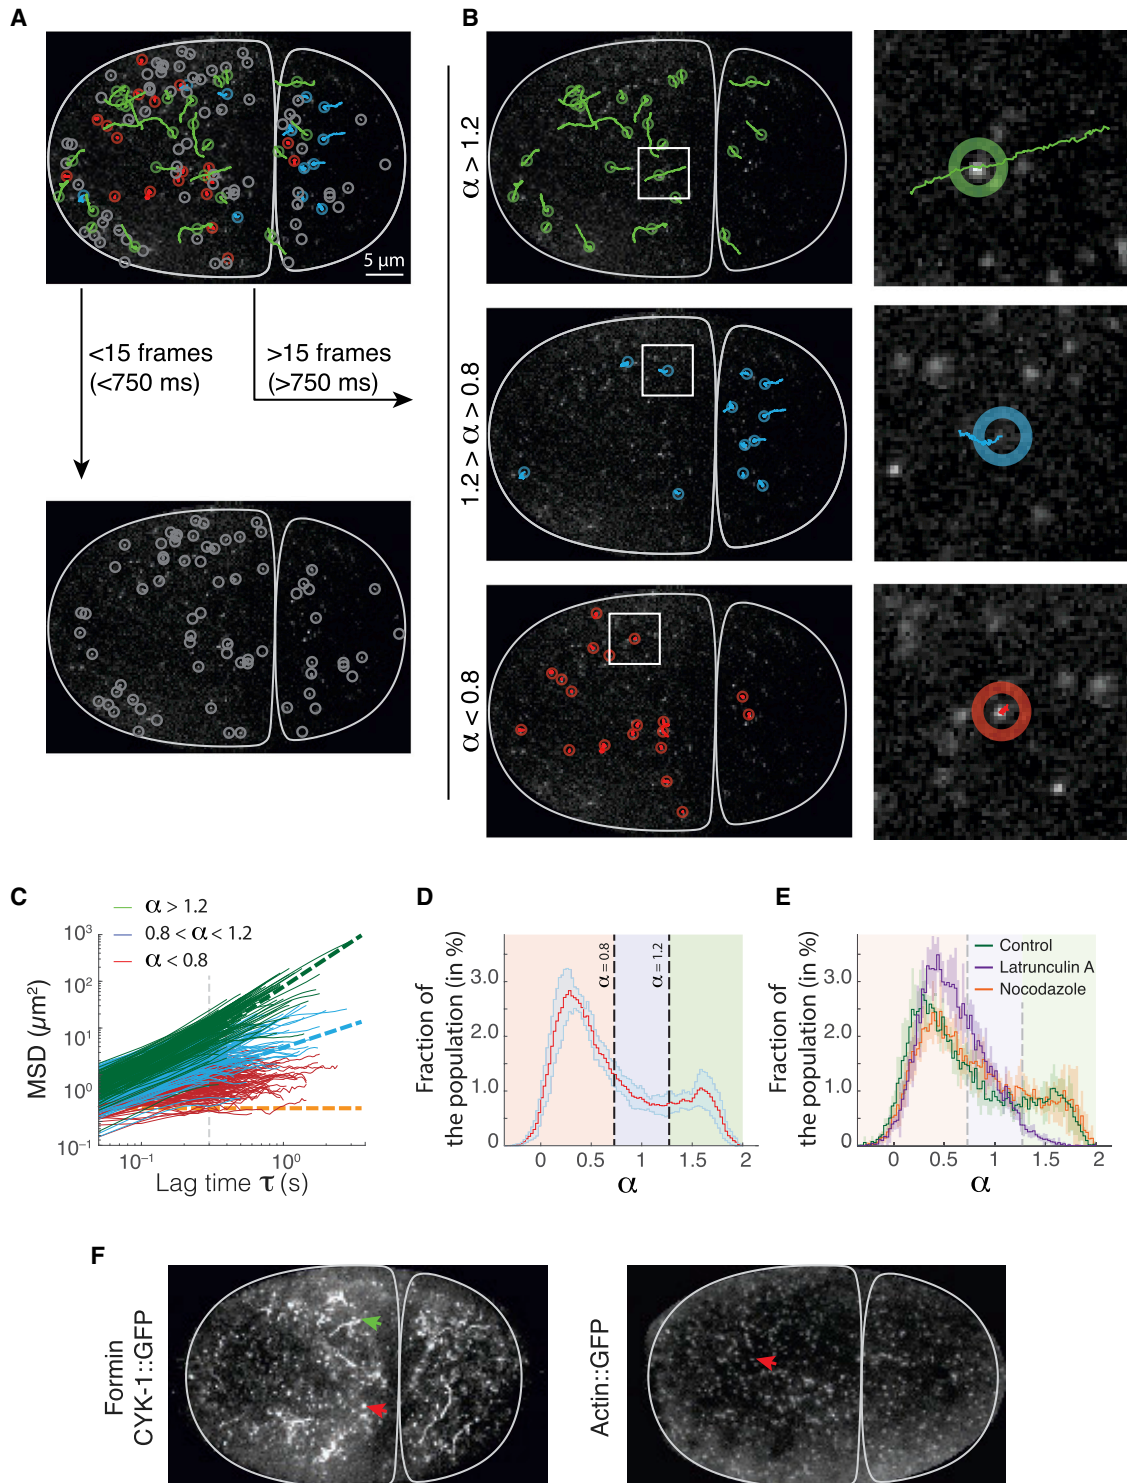

**Figure 1. Anomalous diffusion of individual formin molecules identifies a subpopulation of actin-elongating formins**

(A) Single-molecule imaging and tracking of formins fused with GFP (CYK-1::GFP CRISPR strain) shows individual behaviors ranging from superdiffusive (green) to diffusive (blue) to subdiffusive (red).

(B) Detected mobilities correspond to different classes of behaviors. Superdiffusive particles display a characteristic ballistic motion (green, top panel), whereas subdiffusive particles appear immobile in the cortex (red, bottom).

(legend continued on next page)



Thus, Rho GTPases spatially and temporally pattern the recruitment, turnover, and activity of downstream effectors. It remains unclear, however, how these orchestrated modulations of actomyosin dynamics support the specific cellular function of Rho zones. Here we show that the dynamics and topology of RhoA activation, converting a RhoA chemical gradient into assembly of a polar actin network, drive formation of a network structure tuned to its contractile function.

In the nematode *Caenorhabditis elegans*, pulsed contractions occur from the 1-cell stage onward during interphase (Munro et al., 2004; Mayer et al., 2010) and support cell polarization and apical constriction (Nance and Priess, 2002; Nance et al., 2003; Roh-Johnson et al., 2012). Here we show that RhoA pulses control accumulation of the formin CYK-1 (a diaphanous/mDia homolog), driving F-actin accumulation during pulsed contractions. We further show that actin network assembly is kinetically controlled by saturation of actin filament barbed ends, resulting in a time-optimal response to RhoA activation so that initiation of actin elongation closely follows the RhoA pulse. Using single-molecule microscopy to infer local actin filament orientation during pulse assembly, we show that formin-assembled actin networks are polar, generating networks with barbed ends pointing outside of the pulse. Finally, our computational exploration shows that this polar network architecture is favorable for generation of efficient actomyosin contractility. These results underline kinetic rather than mechanical control of actomyosin network orientation during pulsed contractions. They also underline the evolution of billion-years-old machinery, reusing molecular machinery—formin, F-actin, and myosin II—to drive a fundamentally conserved phenomenon, precisely tuned force generation, with opposite geometries reflecting organism-specific construction rules and constraints.

## RESULTS

### Cortical dynamics of formins in a developing embryo

Formins drive assembly of a variety of actin-based cellular structures that drive physiological processes ranging from cell division and cell migration to cell polarization (Rottner et al., 2017). Formins are actin nucleators and processive actin elongators, catalyzing addition of actin monomers to the barbed end of actin filaments while protecting the filament against capping (Courtemanche, 2018). In *C. elegans*, 7 formin genes have been identified previously (Mi-Mi et al., 2012). Mutants for five of them are viable (Mi-Mi et al., 2012), and the product of another localizes to the nucleus and does not interact with actin *in vitro* (Amin et al., 2007, 2009; Johnston et al., 2006). *cyk-1* (cytokinetic defective-1), the only ortholog of the Diaphanous family of

formins, is required for cell division and plays a key role in actin assembly during the early stages of embryonic development (Swan et al., 1998).

To study CYK-1 in *C. elegans*, we first generated a GFP CRISPR knockin at the genomic *cyk-1* locus. The resulting strain is fully viable and displays no readily identifiable phenotype, suggesting that the fusion protein is fully functional. We then used live single-molecule fluorescence microscopy to visualize the dynamics of individual formin molecules fused with GFP (Robin et al., 2014). We first observed that formins were apparently classified into at least two populations (Video S1), ballistic and static, as observed previously in other systems (Higashida et al., 2004, 2013; Funk et al., 2019). To better visualize these two populations, we used maximum intensity projection to visualize formin trajectories over 100 consecutive time points (Video S2). Static formins appeared as dots, and moving formins appeared as a trail on the cell surface.

To quantitatively characterize these two populations, we performed single-particle tracking and analyzed the trajectories of 19,137 individual formin molecules from 5 embryos. Based on the logarithmic regression of the mean squared displacement to an anomalous diffusion model,  $MSD = 2D \cdot t^\alpha$  (Robin et al., 2014), we characterized all particle trajectories longer than 15 frames or 750 ms (Figures 1A and 1B) by their anomalous diffusion coefficient  $D$  and scaling exponent  $\alpha$ . We could clearly distinguish the two formin populations, static and ballistic, with apparent distributions of the scaling exponent peaking at  $\alpha = 0.3$  (subdiffusive) and  $\alpha = 1.6$  (superdiffusive), respectively (Figures 1C, 1D, and S1A–S1D; Video S3). We subsequently used these empirical metrics to classify and sort these two sub-populations.

Previous work has suggested that these superdiffusive particles represent formins actively elongating actin filaments (Higashida et al., 2004, 2008, 2013; Funk et al., 2019). To confirm this, we used RNAi against *perm-1*, a known component of eggshell protein (Carvalho et al., 2011; Olson et al., 2012) that permeabilizes the eggshell, and subsequently treated the embryos with the microtubule-depolymerizing drug nocodazole and the actin-depolymerizing drug latrunculin A (Video S4). Performing the same analysis as before, we observed that the superdiffusive population essentially disappeared after latrunculin A treatment but was unaffected by nocodazole treatment (Figure 1E; Video S4). Latrunculin A (LatA) treatment resulted in initially increased recruitment of formins at the cell cortex immediately after LatA treatment (Figures S1E–S1G). Although our quantitative analysis did not reveal strong differences in the fraction of superdiffusive versus subdiffusive population during this brief period after LatA treatment, we could not exclude that this increased

(C) MSD versus lag time (log-log scale). Curve slope reports on the anomalous diffusion exponent  $\alpha$  of the trajectory. Green: superdiffusive ( $\alpha > 1.2$ ). Blue: diffusive ( $0.8 < \alpha < 1.2$ ). Red: subdiffusive ( $\alpha < 0.8$ ). Green dashed: pure superdiffusive ( $\alpha = 2$ ). Blue dashed: pure diffusive ( $\alpha = 1$ ). Orange dashed: immobile ( $\alpha = 0$ ). Detailed curves are available in Figures S1D–S1G.

(D) Distribution of the fraction of particles displaying a given anomalous diffusion exponent in 5 videos (average  $\pm$ SD). Background shows the domains corresponding to the classification used here. Two peaks seem to emerge, centered at  $\alpha = 0.3$  and  $\alpha = 1.6$ .

(E) Compared with the control (green curve), the superdiffusive population is absent in embryos treated with LatA (purple) but not nocodazole (orange). More than 2,000 tracks were analyzed per embryo, with more than 5 embryos per condition presented.

(F) Projection over 5 s (100 consecutive frames) of formin CYK-1::GFP (left) and actin::GFP (right) speckles, showing subdiffusive speckles (red arrow) and superdiffusive trails (green arrow). Actin::GFP does not display superdiffusive trails.

formin recruitment could be caused by increased CYK-1 nucleation secondary to an increase in G-actin concentration (Figures S1E–S1G). These results strongly supported the idea that superdiffusive cortical CYK-1::GFP speckles corresponded to formin dimers actively and processively elongating actin filaments at the barbed end of the filament at the cell cortex.

To measure the speed of formin speckles, we used two metrics. We either selected a collection of trajectories, smoothed them, projected the position of the formin on the smoothed trajectory, and quantified the traveled distance along this trajectory, or we used mean squared displacement (MSD) measurements presented before. Both metrics yielded very similar result,  $1.1 \pm 0.2 \mu\text{m} \cdot \text{s}^{-1}$  and  $1.3 \pm 0.2 \mu\text{m} \cdot \text{s}^{-1}$  (standard deviation), in line with previously reported speeds (Higashida et al., 2004) but slower than in a recent *in vivo* report (Funk et al., 2019).

To test whether immobile formins may be elongating actin filaments, we decided to use fiducial markers on the network of actin filaments. We showed previously in *C. elegans* that actin::GFP incorporates at the cleavage furrow during cell division (Robin et al., 2014), which has also been demonstrated in mammalian cell culture (Murthy and Wadsworth, 2005; Zhou and Wang, 2008; see also Skrubber et al., 2018). In embryos depleted of Arp-2/3 by RNAi, cortical recruitment of actin::GFP is unaltered (Michaux et al., 2018). This suggests that, although actin::GFP might be selected against and not fully functional, it is still incorporated in formin-elongated networks and should work as an effective probe to test our hypothesis. We did not observe significant directional movements, and single-molecule speckles of actin::GFP remained largely immobile (Video S5).

To ascertain that our result was not affected by a failure of actin::GFP to efficiently incorporate into the formin network (Chen et al., 2012; Wu and Pollard, 2005), we decided confirm this first result by observing the single-molecule cortical dynamics of an F-actin side-binding probe, UtrophinABD::GFP. Although this alternative strategy would not focus on actin monomers recently incorporated into the network, if strong elongation from immobile formins were to occur and displace actin monomers, then we would expect to see a signature of these movements in the motion of UtrophinABD::GFP speckles. Similarly, single-molecule speckles of actin::GFP and UtrophinABD::GFP remained largely immobile, not displaying significant directional mobility. The fact that neither probe displayed significant directional movements, and single-molecule speckles of actin::GFP and UtrophinABD::GFP remained largely immobile (Figure 1F; Videos S5, S6, and S7; Robin et al., 2014), strongly supports the idea that filament elongation instead fully translates in formin directional motion and that immobile formins are indeed not elongating actin filaments, or at very low speeds.

These data show that CYK-1 velocity is a reliable *in vivo* proxy for formin elongation rate, demonstrating an average elongation rate of  $\sim 400\text{--}468 \text{ monomers} \cdot \text{s}^{-1}$ . Incidentally, our results also suggest that CYK-1 could be used as a biosensor to measure cellular modulations of the concentrations of profilin-ATP-G-actin, calibrated on elongation rates reported previously *in vitro* in the presence of profilin (Neidt et al., 2008, 2009). Provided that, in our system, formin-mediated actin filament elongation rates are not buffered by slow dissociation of profilin from the

barbed end (Funk et al., 2019) or modulated by mechanical forces (Jégou et al., 2013; Courtemanche et al., 2013; Kubota et al., 2017), our results point to a local profilin-ATP-G-actin concentration in the early embryo in the  $\sim 10\text{--}12 \mu\text{M}$  range (see STAR Methods for details).

### Formin-mediated actin filament elongation rates during the cell cycle

To explore whether actin elongation was dynamically modulated during embryonic development, we measured formin velocity at the 1-, 2-, and 4-cell stages during distinct phases of the cell cycle (Figure 2A). To avoid confounding effects of overcrowding on tracking at high particle density, we decided to use a strain overexpressing CYK-1::GFP, which displays essentially identical dynamics as our CRISPR CYK-1::GFP but allowed us to use GFP RNAi (Robin et al., 2014) to visualize formins at much lower densities, improving particle tracking (Videos S8 and S9). At the 1-cell stage, the elongation rate remained unchanged from polarization to the maintenance phase ( $1.25 \pm 0.18 \mu\text{m} \cdot \text{s}^{-1}$  and  $1.27 \pm 0.16 \mu\text{m} \cdot \text{s}^{-1}$ , respectively) but decreased significantly over the entire cortex during cytokinesis to  $1.05 \pm 0.22 \mu\text{m} \cdot \text{s}^{-1}$ .

The velocity increased again after cytokinesis, going back to levels similar to 1-cell stage polarity establishment ( $1.24 \pm 0.19 \mu\text{m} \cdot \text{s}^{-1}$ ), remaining stable or slightly decreasing during mitosis ( $1.18 \pm 0.18 \mu\text{m} \cdot \text{s}^{-1}$ ) in the AB cell, and decreasing again during AB cytokinesis ( $1.04 \pm 0.18 \mu\text{m} \cdot \text{s}^{-1}$ ). During interphase at the 4-cell stage in ABp, formin velocity increased again but was notably lower in interphase compared with mitosis ( $1.15 \pm 0.17 \mu\text{m} \cdot \text{s}^{-1}$  at interphase and  $1.24 \pm 0.18 \mu\text{m} \cdot \text{s}^{-1}$  during mitosis). These results show that formin speed drops significantly during cytokinesis but increases when interphase resumes.

To compare actin elongation rates across lineages, we also measured formin speed in AB and P1 at the 2-cell stage during interphase ( $1.24 \pm 0.19 \mu\text{m} \cdot \text{s}^{-1}$  and  $1.18 \pm 0.18 \mu\text{m} \cdot \text{s}^{-1}$ , respectively) and during mitosis ( $1.18 \pm 0.18 \mu\text{m} \cdot \text{s}^{-1}$  and  $1.22 \pm 0.19 \mu\text{m} \cdot \text{s}^{-1}$ , respectively) (Figure 2B). Our results suggest that formin speed does not vary between the two cell types.

We also manually quantified the fraction of superdiffusive formins at different stages of the cell cycle from the 1- to the 4-cell stage. We observed that the ratio fluctuates mildly from 20% to 35% from the 1- to the 4-cell stage, with the highest fraction of superdiffusive formins observed during interphase (Figure S2).

Actin elongation dynamics are distinctly modulated during phases of the cell cycle, decreasing significantly by more than 10% during cytokinesis and increasing again after cytokinesis completion. The measured elongation rates seemed to be relatively robust and only changed marginally from the 1-cell to the 4-cell stage. Because the measured elongation rates reflect the catalytic enzymatic activity of formin as an actin elongator, these changes could report on modulations in the concentration of G-actin species, either free G-actin or complexed with other factors, such as the profilin PFN-1. The balance between these various species in particular might play an important role in control of elongation rates. Our results suggest that F-actin elongation dynamics might be dynamically regulated by the concentrations of G-actin species but remain largely robust through time and across cell lineages during early embryonic development.

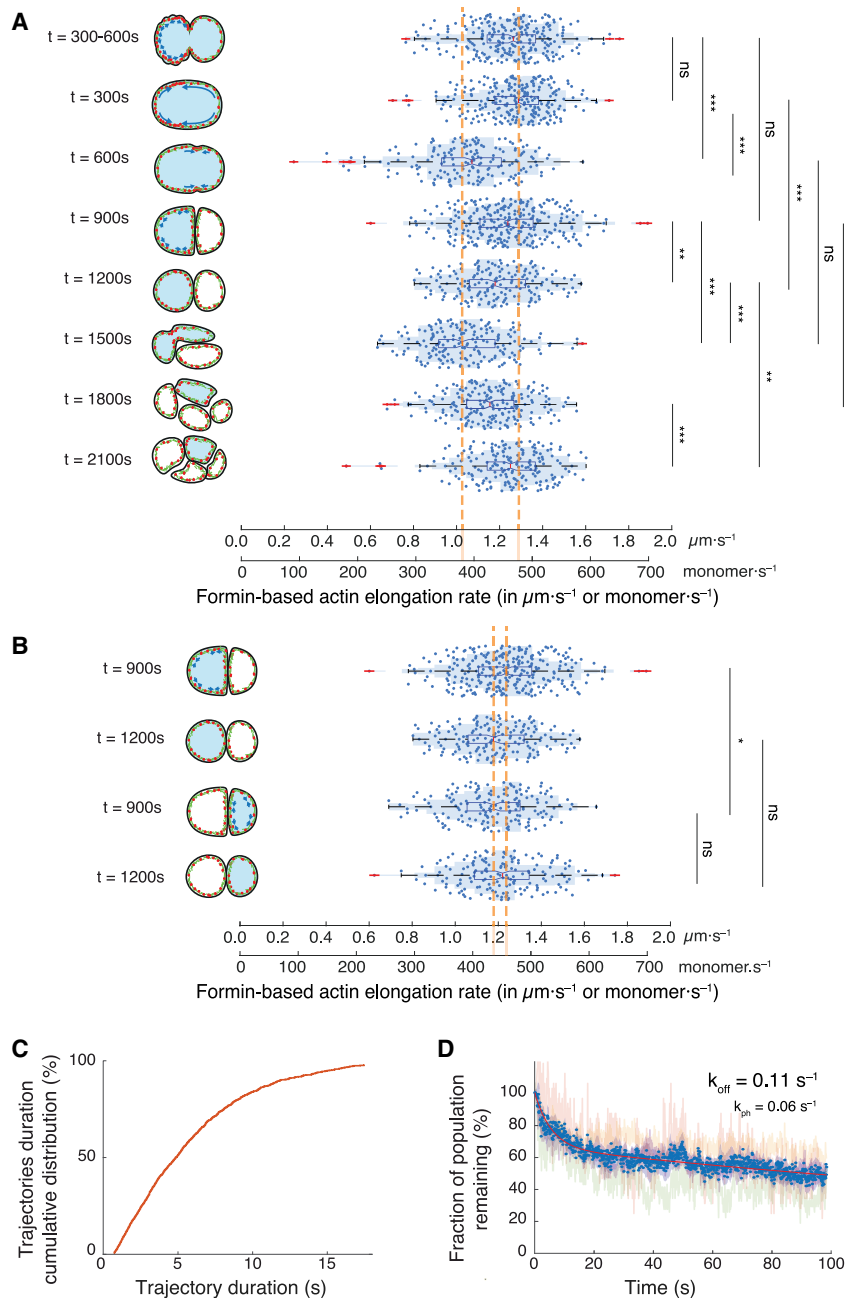

**Figure 2. Formin speed is changed by the cell cycle but conserved through cell lineages**

(A and B) Formin speed in AB (A) and P1 (B) cells. Right: distribution of elongating formin speed. Left: schematic of the stage and location of the cell from which the tracks are extracted, with the measured cell in light blue. Myosin is shown in red and actin in green. \* $p \geq 0.05$ , \*\* $p \geq 0.01$ , \*\*\* $p \geq 0.001$ ; ns, not significant. A dashed orange line marks upper and lower averages. Outliers are shown in red. See [Tables S1](#) and [S2](#) for detailed statistical information. (C) Cumulative distribution of CYK-1::GFP trajectory duration as a fraction of detection events, showing a half-life of  $\sim 5$  s. (D) The surviving fraction of cortical CYK-1::GFP as a function of photobleaching time reports on the turnover rate  $k_{\text{off}}$  and the photobleaching rate  $k_{\text{ph}}$ . Curves of photobleaching for 4 individual embryos, normalized for initial values, are shown in colored shades. Biexponential fit is shown in solid red. Experiments were performed on the CYK-1::GFP overexpression strain. GFP density was reduced using GFP RNAi.

where  $1/\tau_{\text{filament}} = 1/\tau_{\text{actin}} + 1/\tau_{\text{formin}}$  is a characteristic “off” rate of formins and  $V_{\text{formin}}$  their speed (see [supplemental information](#) for the detailed derivation). To estimate filament length, we needed to access actin and formin off-rates and use our measured actin filament elongation rates.

We expected a significant fraction of trajectory to be interrupted by tracking failure or photobleaching, barring us from using single-molecule tracking as a proxy ([Figure 2C](#)). We therefore turned to a previously established strategy, smPRESS ([Robin et al., 2014](#)), to estimate a bulk turnover rate for formins as well as the photobleaching rate. Briefly, by measuring the depletion of cortical formins caused by laser illumination of the cortex in a CYK-1 overexpression strain, we can infer the photobleaching rate and subsequently estimate a bulk formin turnover rate over all formin populations. We could thus establish that the

bulk cortical turnover rate of the formin CYK-1 is  $\sim 0.11 \text{ s}^{-1}$  ([Figure 2D](#)).

Combining our results with previous measurements of actin::GFP turnover rates ( $0.05\text{--}0.15 \text{ s}^{-1}$ ; [Robin et al., 2014](#); [Michaux et al., 2018](#)), we estimate that formin-elongated actin filaments scale to  $\sim 6 \mu\text{m}$  on average in the 2-cell-stage *C. elegans* embryo.

### Dynamics of formin at the cortex during pulsed contractions

During interphase at the 2-cell stage and during polarity establishment in the 1-cell embryo, myosin II accumulates in

### Formin kinetics and implications on actin filament length *in vivo*

The length of formin-elongated actin filaments is controlled by a combination of the formin elongation rate, the formin global off-rate (combining unbinding and competition), and the turnover rate of F-actin monomers in the cortex. Specifically, we assumed that F-actin turnover and elongation dynamics are independent processes and follow exponential laws with the characteristic rate  $1/\tau_{\text{actin}}$  and  $1/\tau_{\text{formin}}$ . For an F-actin monomer at the time of its disassembly, the length of a filament from the monomer to the barbed end of the filament follows an exponential law with the characteristic length  $L_{\text{filament}} = V_{\text{formin}} \times \tau_{\text{filament}}$ ,

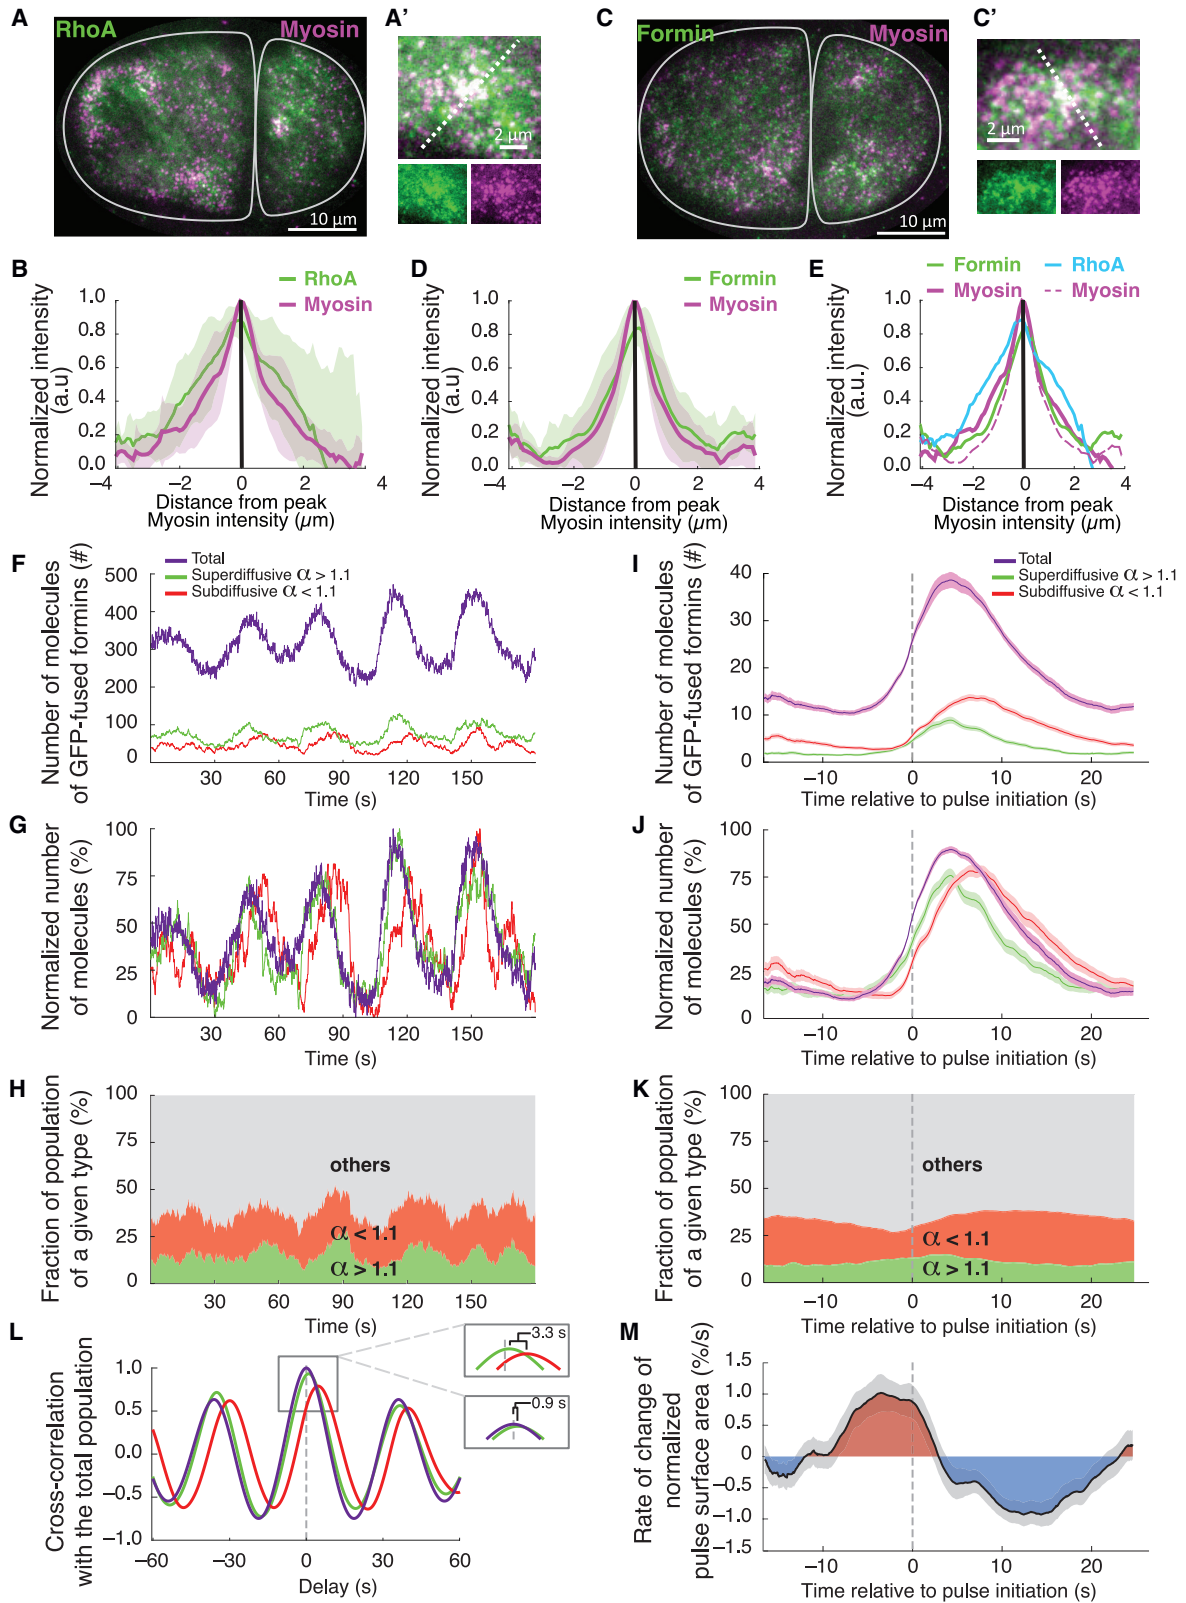

(legend on next page)



well-identifiable foci, driving local contractions of the actomyosin cortex, a process called pulsed contractions, driven by the Rho GTPase RhoA (Michaux et al., 2018). During the corresponding stage of the cell cycle, formins also displayed pulsed cortical accumulations reminiscent of RhoA/myosin pulsed dynamics (Video S2), so we decided to focus on the dynamics of formins during pulsed contractions.

We first monitored RhoA activation using a biosensor derived from the Rho-binding domain of Anillin, encompassing the Anillin homology (AH) and pleckstrin homology (PH) domains (Figures 3A–3E and S3A; Video S2; Munro et al., 2004; Piekny et al., 2005; Tse et al., 2012; Naganathan et al., 2014; Reymann et al., 2016; Michaux et al., 2018). As described previously (Michaux et al., 2018), in a strain co-expressing the RhoA biosensor with myosin (NMY-2::mRFP), we observed a spatial correlation between the localizations of myosin and the RhoA biosensor (Figures 3A, 3A', 3B, S4E, and S4F). We further confirmed these results by visualizing ROCK, a direct downstream effector of RhoA, in a strain expressing ROCK fused with GFP from the endogenous genomic locus along with NMY-2::mRFP (Bell et al., 2020). By co-monitoring ROCK/LET-502 and myosin/NMY-2, we found, as observed previously at the 1-cell stage (Bell et al., 2020), that ROCK also accumulated in domains prefiguring myosin localization, displaying very similar spatial and temporal recruitment dynamics as our RhoA biosensor (Figures S4A–S4C, S4G, and S4H).

To test whether pulsed accumulations of formins were indeed coordinated with pulsed contractions, we compared the spatial and temporal distribution of formins and myosin II using a strain co-expressing NMY-2::mRFP and CYK-1 fused with GFP from the endogenous locus. We indeed observed that formins accumulated in broad domains that prefigured the accumulation of myosin/NMY-2 (Figures 3C, 3D, S4I, and S4J). To verify the spatial alignment between the regions where myosin accumulated, we measured the intensity across the region of accumulation, using the locus of maximal myosin intensity as a point of

reference, when myosin and the co-monitored species were present. Using this approach, we observed that myosin-pulsed accumulations overlapped spatially with those of RhoA, ROCK and formin (Figures 3B, 3D, 3E, S4A–S4C, S4F, S4H, and S4J).

To infer the biochemical sequence of formin activation during pulsed contractions, we decided to measure the timing of arrival of the various formin populations over the course of a pulsed contraction. We divided our trajectories into 3 tiers: short tracks (<15 consecutive time frames), which could not be categorized into a specific population; long subdiffusive; and long superdiffusive. Using this technique, we were able to demonstrate that the ratio between the different populations was finely modulated during pulses (Figures 3F–3K). To characterize the dynamics of arrival of these populations at the cell cortex, we first focused on the kinetics of these populations on a sequence of successive pulses (Figure 3F). We observed an iterated sequence of accumulation (Figures 3G and 3H). Using cross-correlation, we measured a delay between arrival of the superdiffusive and subdiffusive populations of ~3 s (Figure 3L). This suggested that the distinct populations accumulated at the cortex in a sequence, with superdiffusive formins (hereafter called elongating formins) accumulating first, followed by subdiffusive formins (hereafter called recruited formins).

To confirm this result, we collected a series of 115 pulses from 10 embryos and quantified the dynamics of the different formin subpopulations along with the dynamics of the pulse. To show that formin accumulations were indeed coupled with pulsed contractions of the actomyosin cortex, we first measured the rate of change of the surface area of our formin pulses (Figures 3M and S8; Video S10; see the flowchart of the image analysis procedure for details). We further confirmed the contraction of the network during pulsed contractions by visualizing fiducial landmarks on the network with actin fused to GFP (ACT-1::GFP, overexpression strain, single-molecule level), along with the myosin heavy chain fused with mCherry (NMY-2::mCherry, overexpression strain) as a general marker for pulsed contractions (Figure S4D;

### Figure 3. Recruited formins and actin-filament elongating formins display distinct dynamics during pulsed contractions

- (A) Two-cell stage embryo showing the RhoA biosensor (green, AHPH::GFP) and myosin II (magenta, NMY-2::mKate2).  
 (B) Mean normalized intensity of RhoA and myosin density profile across pulses. See Figure S4 for detailed information on quantifications.  
 (C) Two-cell stage *C. elegans* embryo expressing formin CYK-1::GFP CRISPR (green) and myosin NMY-2::mKate2 CRISPR (magenta).  
 (A' and C') Corresponding magnified views of a single pulse. Top: both channels. Bottom: separate channels.  
 (D) Formin normalized mean intensity (solid green) and myosin (solid magenta) density profile along an axis drawn through pulses.  
 (E) Compiled results from (B) and (D).  
 (B, D, and E) Shaded curves: standard deviations from 18 pulses from 6 embryos.  
 (F) The number of total (purple), superdiffusive (green), and subdiffusive (red) formin CYK-1::GFP molecules during pulsed contractions varies periodically.  
 (G) Normalized number of molecules during pulsed contractions. The populations display distinct accumulation dynamics.  
 (H) Temporal evolution of the relative fraction of superdiffusive (green) and subdiffusive (red) subpopulations within the total population during pulsed contractions.  
 (I–K) Dynamics of formin CYK-1::GFP populations during pulsed contractions, averaged over 115 pulses from 10 embryos. Individual pulses are synchronized to pulse initiation ( $t = 0$ ; see also Figure 5F). In (I) and (J), the number of total (purple), superdiffusive (green), and subdiffusive (red) formin CYK-1::GFP speckles during pulsed contractions. Absolute (I) and normalized (J) numbers of molecules during pulsed contractions show that superdiffusive (green), subdiffusive (red), and total formin (purple) populations accumulate with distinct dynamics.  
 (L) Cross-correlation with total population of superdiffusive (green), subdiffusive (red), and total (purple) formin populations. The offset shows that subdiffusive formins accumulate 3.3 s after superdiffusive formins.  
 (F–H and L) Population dynamics of formin CYK-1::GFP in a single embryo during 5 consecutive pulsed contractions.  
 (M) Rate of change of normalized pulse area during a pulsed contraction. The contraction (blue overlay) starts ~3 s after pulse initiation and ~6 s after particles start to accumulate in the pulse.  
 (I, J, and M) Shaded curves: SEM.  
 (F–M) CYK-1::GFP overexpression strain. GFP density was reduced using GFP RNAi.



Video S11). Based on these results, we then confirmed that formins accumulated at the cortex in a well-defined sequence, starting with superdiffusive followed by subdiffusive formins (Figures 3I–3K; Video S10). We further confirmed this observation using a different metric (based directly on particle displacement instead of trajectory classification) to measure this delay (Figures S3B–S3E), which yielded very similar delays (Figures S3F–S3I).

This result was somewhat surprising because, based on previous work on formin structure and domain activity, we expected an activation sequence where formins would be first recruited to the cortex by RhoA and then transferred to barbed ends of actin filaments to promote elongation (Li and Higgs, 2003, 2005; Higgs, 2005). Numerically, however, the number of recruited formins outweighed the elongating population (Figure S3F, class 1 versus class 2), suggesting that the system might be running under a regimen where formins are in excess.

Previous work (Higashida et al., 2004, 2008, 2013) also reported two formin subpopulations. In these studies, low doses of latrunculin B (Higashida et al., 2008) and gentle mechanical stimulation (Higashida et al., 2013) increased the fraction of mobile formins, and the authors demonstrated that this increase in the mobile formin fraction was caused by an increase in free G-actin concentration. In our system, however, it is difficult to imagine that pulsed contractions could drive changes in free G-actin either locally or globally. Global changes would require that individual, uncoordinated pulses, spanning ~5%–10% of the cell surface (Video S2), robustly alter the free G-actin concentration at the cell scale, even as only ~10% of actin monomers are assembled as F-actin at the cortex (Robin et al., 2014). On the other hand, we expect that local changes in free G-actin concentration would be instantly mitigated by diffusion in this almost circular system. These two arguments go against the hypothesis that local actin assembly dynamics would change free G-actin concentration at the pulse scale and lead to the observed sequence of events during local and asynchronous pulsed contractions.

Two other classes of models could explain this sequence of recruitment. The first class of models invokes delayed activation by RhoA of a formin competitor for barbed-end binding. The heterodimeric capping protein CP/CapZ, an ortholog of the *C. elegans* proteins CAP-1 and CAP-2, is a major actin-capping protein *in vivo* and might be an interesting candidate for such a mechanism. CAP-1/2 was recently described as forming a *mé-nage à trois* (or “decision complex”; Bombardier et al., 2015) with formins at the barbed end, weakening formin/barbed-end binding affinity and eventually leading to formin displacement (Shekhar et al., 2015).

Alternatively, in a second class of models, a non-diffusible limiting factor would be consumed locally by formins during their recruitment to the cortex. We hypothesized that one such factor could be uncapped barbed ends available for elongation, running under a regimen where formins are recruited in excess of that population of barbed ends, and elongate actin filaments from this limiting pool. Although, in this scenario, the shift from elongating to recruited/inactive formins would result from saturation of available barbed ends rather than competition between formins and capping proteins for barbed ends, such a model would essentially present the same kinetic signature.

### A barbed-end saturation mechanism allows responsive actin assembly

To test whether this second model of limiting available barbed ends was plausible, we designed a simple kinetic model for CYK-1 recruitment and used this model to explore the temporal dynamics of formin accumulation (Figures S5A and S5B). We postulated that

- (1) active RhoA concentration pulses periodically, with a period of 30 s (Michaux et al., 2018);
- (2) cytoplasmic formins are activated by active RhoA and recruited to the cortex, shifting in the recruited population (Li and Higgs, 2005);
- (3) CYK-1 formins are poor nucleators but good elongators—we considered that formins do not efficiently nucleate new filaments under physiological conditions (*in vitro* actin assembly yields ~1 new nucleated filament per 550 CYK-1 formin molecules at 2.5  $\mu\text{M}$  actin and 2.5  $\mu\text{M}$  profilin PFN-1 (Neidt et al., 2008);
- (4) when recruited at the cortex, formins bind to barbed ends through a bimolecular reaction to drive actin assembly, becoming elongating formins; and
- (5) recruited and elongating formins unbind from the cortex, returning to the cytoplasmic pool with characteristic rates of  $1/\tau_{\text{recruited}}$  and  $1/\tau_{\text{elongating}}$ .

To seed our model, we used measured parameter values for RhoA activity, formin unbinding rates, and relative ratios between the different formin populations. Using these parameters, and provided that, in our parameters, (1) the binding reaction of recruited formins to barbed ends is very fast, and (2) barbed ends are scarce and are depleted when formin density increases, our model indeed captured the key observation that elongating formins accumulated before recruited formins (Figures 4A–4C). Under these conditions, during an early phase, elongating formins accumulate rapidly after the RhoA pulse, followed by a late phase during which recruited formins accumulate (Figures 4B, 4F, and S5C–S5H).

We favored a model for activation where RhoA binding preceded dimerization (Figure S5A), although other models (e.g., a dimer existing before the formin binds to RhoA and unfolds) are also plausible. The simulation, however, proved to be robust to these modifications of the biochemical scheme (Figures 4D and 4E).

Under a small set of assumptions, we can explain the emergence of a significant delay between recruited and elongating formins. Provided that this model is correct, saturation by CYK-1 of free barbed ends of actin filaments would allow a rapid response to pulsed RhoA activation (Figures S5C–S5H). These results demonstrate that the kinetics of the actin cytoskeleton in the early *C. elegans* embryo is wired to drive a fast response to upstream activation of actin dynamics.

### Relative rates of actin assembly and contractility support polar network assembly

During pulsed contractions, cortical contractile dynamics results in peak cortical flow rates of ~0.3  $\mu\text{m}\cdot\text{s}^{-1}$  (Michaux et al., 2018; Munro et al., 2004; Nishikawa et al., 2017). In comparison, elongating formins move relatively rapidly, with a measured

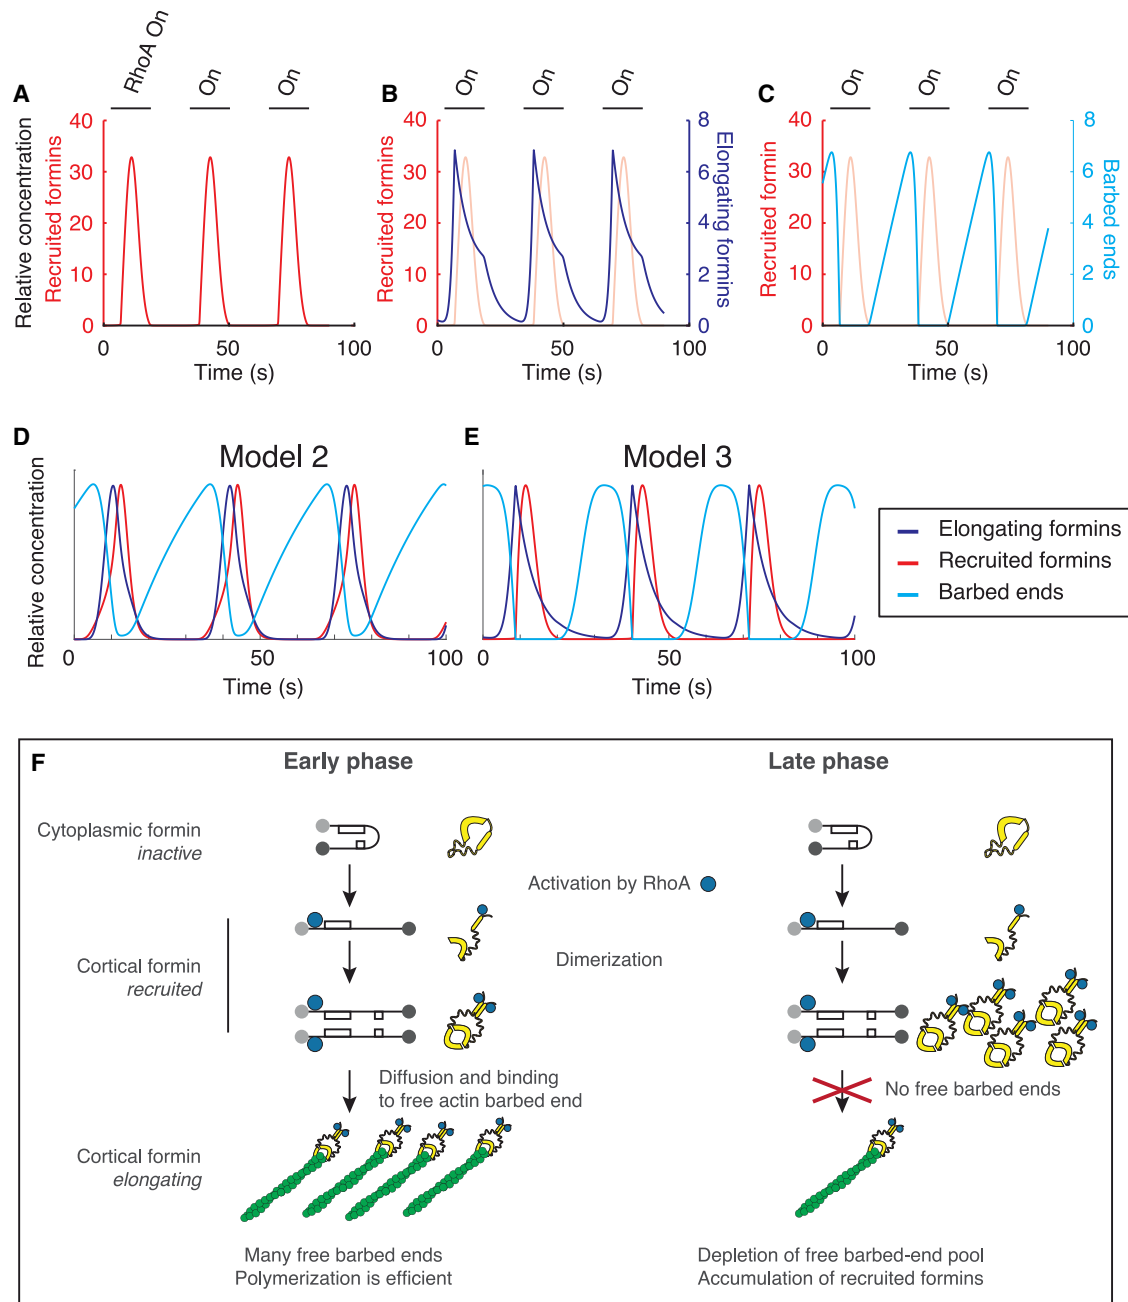

**Figure 4. Modeling formin recruitment dynamics with an excess of formins over barbed ends reproduces the *in vivo* recruitment sequence**

(A) Temporal dynamics of recruited formins during a sequence of 3 pulses. Red, recruited formins.  
 (B) Same as in (A) but with elongating formins (purple, elongating formins; light red, recruited formins). Recruited formins accumulate after elongating formins.  
 (C) Temporal dynamics of barbed ends (cyan, barbed ends; light red, recruited formins). Model with 2 free parameters and 4 fixed parameters, the value of which was set based on experimental measurements. Barbed ends accumulate progressively in the absence of formins (between pulses) but are rapidly used upon formin recruitment. Recruited formins are immediately converted into elongating formins so that elongating formins accumulate until depletion of the built-up barbed ends. The RhoA activation period is denoted by a black line and “Rho On” or “On.”  
 (D) The same model with a different choice of parameter values for the free parameters of the model. The outcome is similar.  
 (E) Distinct model where barbed ends are generated periodically during the end of the pulsed contractions, mimicking myosin-driven actin buckling/severing activity. This model also readily reproduced the expected outcome without additional refinement.  
 (F) Schematic of the two phases of the pulse, representing a “first come, first served” scenario. Early phase: formins arrive at the cell surface, barbed ends are available, and recruited formins are immediately converted into elongating formins. Late phase: upon depletion of the barbed-end pool, formins are trapped in the recruited state.

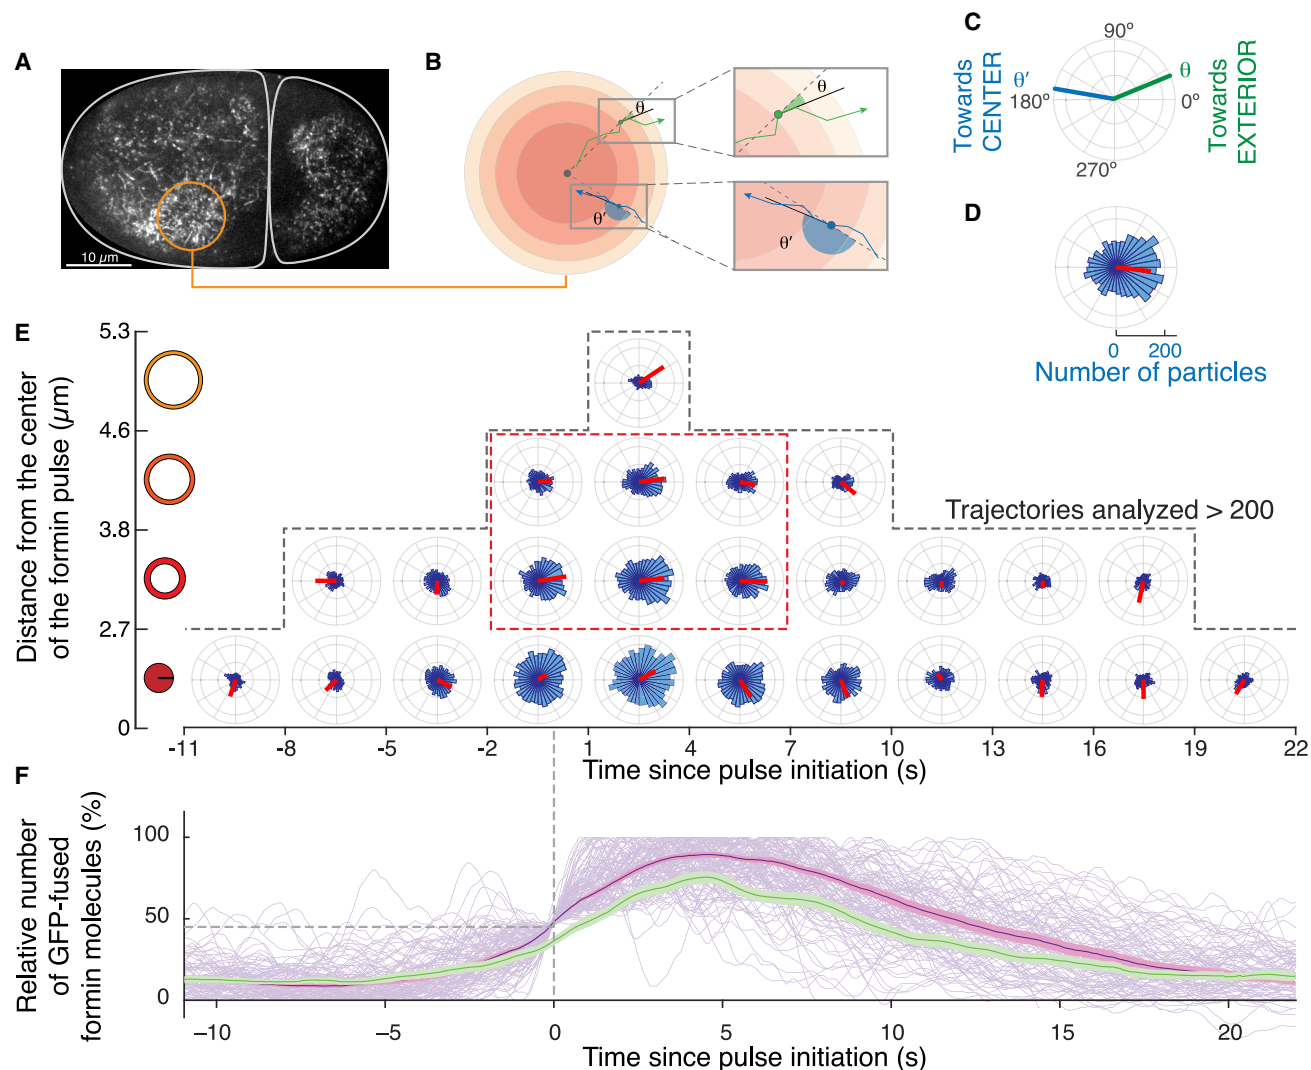

**Figure 5. CYK-1 formin-driven actin-filament elongation during pulsed contractions drives formation of a transient polar actin network, barbed ends pointing out**

(A) 2-cell-stage embryo expressing CYK-1::GFP. Orange circle, pulsed contraction.

(B) Measurement of the angle is performed with respect to the center of the formin pulse and the local orientation of the formin trajectory.

(C) Green (blue) track oriented with the filament barbed end pointing away from (toward) the center of the formin pulse.

(D) Angle distribution for steps of elongating formins. Average elongation orientation is shown as a red segment.

(E) Angle distribution of superdiffusive formin trajectory steps during pulsed contractions. During the peak of the pulse, around the pulse center, superdiffusive formins display, on average, an outward orientation (dashed red box). 115 pulses derived from 10 distinct embryos were used to collect more than 50,000 trajectories. Steps are binned according to the distance from the center of the formin pulse (vertical) and time from  $t = 0$  (horizontal, 3-s intervals) to produce each rose plot. Steps are then mapped in the polar histogram as in (C). Individual pulses are synchronized to pulse initiation ( $t = 0$ , first pass at 45% of the normalized number of particles in the considered pulse), as shown in (F). Average step orientation is displayed as a red segment, with length reflecting statistical significance. Rose plots with fewer than 200 steps are not represented (the dashed line outlines plots with >200 steps).

(F) Evolution of the number of particles in a pulse; the same axis as in (E). Light purple, total number of formin particles in individual pulses; dark purple, the corresponding average and SEM; green, average and SEM for the superdiffusive population.

This is the same dataset as in Figures 3I–3L. Experiments were performed on the CYK-1::GFP overexpression strain. GFP density was reduced using GFP RNAi (see STAR Methods for additional details).

speed of  $1.1\text{--}1.3\ \mu\text{m}\cdot\text{s}^{-1}$ . As a consequence, even at the peak of contraction, elongating formins can “exit” the contraction zone easily and assemble an actin network of filaments up to several microns around the pulse region. To describe the architecture of this network, we measured the orientation of formin-based actin

elongation during pulse assembly. We focused on elongating formins and measured the orientation of elongation radially away from the zone of formin accumulation (Figures 5A–5D), which essentially corresponds to the RhoA recruitment zone (Figure S3A). Displaying only orientations where we could collect





more than 200 individual elongation measurements, we observed that formins are not heavily oriented outside of the pulse time window (Figures 5E and 5F). In contrast, during the peak of assembly (corresponding approximately to the period where elongating formins >50% max.), the orientation of formin-mediated actin assembly displayed strong polarization (Figure 5E).

These results show that formins elongate the actin network with a polar dynamics, with elongation during the pulse occurring, on average, from the center of the formin pulse to the outside. Because formin-based elongation increases local actin concentration ~2-fold (Michaux et al., 2018), we propose that pulses assemble a polar actin network with barbed ends pointing outward of the pulse, akin to an “actin aster” (see discussion).

To test whether this orientation resulted purely from the transient local gradient of elongating formins between the pulsing region and its surroundings or whether additional mechanisms should be invoked, we designed a simple spatial model of formin orientation. To seed our model, we exclusively used measured parameters of formin recruitment and elongation dynamics (formin-mediated actin filament elongation rate, density, activation/elongation duration, and off-rate and pulsed contraction localizations) and generated synthetic formin pulsed accumulations with random orientations. The modeled formin dynamics displayed similar orientations, with filaments pointing outward, closely mirroring the dynamics observed *in vivo* (Figure S6; Video S12). These results demonstrate that local formin accumulation drives the assembly of a polar actin network architecture, with the majority of barbed ends pointing out.

### Actomyosin network polarity supports efficient contractility

Although previous work, theoretical (Lenz et al., 2012a, 2012b) and *in vitro* (Linsmeier et al., 2016), showed that actin contraction does not require a specific network orientation, *in vivo* observations suggest that pulsed contractions form a polar actin network (Coravos and Martin, 2016). *In vitro* and computational work shows that myosin II contractility can drive polar network reorganization by barbed-end filament sorting with an opposite polarity (Kreten et al., 2018; Wollrab et al., 2018). We thus wanted to determine whether the polar network architecture we observed,

barbed end pointing out combined with myosin II intrinsic polarity as a plus-end-directed motor (Howard, 2001), would not support stronger contractions or contraction over larger distances. Independently controlling network orientation and density while faithfully constraining other parameters, however, was not experimentally manageable *in vivo* or *in vitro*. We decided to turn to agent-based models of cortical mechanics to decipher the impact of network architecture on contractility.

Using our established computational model of actomyosin networks (Figure S7A; Bidone et al., 2017; Kim, 2015), we probed the roles of formin-induced F-actin elongation in cortex mechanics and architecture. Using a three-dimensional cortex-like actin meshwork (20  $\mu\text{m} \times 20 \mu\text{m} \times 100 \text{nm}$ ), we simulated RhoA-driven pulsed contraction by locally modulating the kinetics of myosin II and F-actin elongation rates based on experimental measurements (Figure S7B). Specifically, to reproduce formin activity, we increased the elongation rate of a fraction of the barbed ends in the RhoA-activated region, resulting in rapid elongation of actin filaments for ~10 s or ~12  $\mu\text{m}$  (Figure 6A, top row). We then locally turned on myosin II activity in the RhoA-activated region for 15 s and with a delay of ~5 s to reproduce delayed myosin II activation by RhoA (Videos S13, S14, and S15; Michaux et al., 2018).

Using this tailored model of pulsed contraction, we then evaluated the impact of formin activation levels on network architecture and the deployment of forces generated by myosin II. We observed that actin and myosin tended to contract toward the center of the activated region upon motor activation, peak, and then relax upon myosin II inactivation (Figures 6B, inset, and S7C). The maximum levels of actomyosin contraction decreased with formin activation levels (Figures 6B and S7D). The sum of forces experienced by formin-elongated actin filaments increased with higher formin activation levels (Figures 6A, second row, and 6C): long, formin-elongated actin filaments are cross-linked with many other short actin filaments, propagating the force generated by myosin II farther into the network (Figure S7E). We also observed that weaker local contraction and longer-range force transmission in the network prevented formation of contraction-induced actin aggregates separated from the rest of the network (Figures 6A and 6B). At high formin activation levels, myosin and actin contractions were inhibited, preventing

### Figure 6. Agent-based models for the mechanics of pulsed contractions demonstrate that polar network architecture supports efficient actomyosin contractility

(A) Simulating a sequence of two successive pulsed contractions. The first pulse occurs in the center, whereas the second pulse location is stochastic. Snapshots were taken at  $t = 10, 20,$  and  $50 \text{ s}$  (during pulse initiation, the first pulse, and the second pulse, respectively; Figure S7B) with three different fractions of barbed ends undergoing quick elongation: 0%, 0.25%, and 1%. Top row: actin, myosin, and actin cross-linking protein are shown in red, green, and gray, respectively. Formin-elongated actin filaments assembled are shown in yellow. Center and bottom rows: magnitude of tensile forces on filaments, visualized using the color scaling shown below. A green overlay represents active myosin motors. Simulations have periodic boundary conditions.

(B) Maximum and end-of-cycle values (blue triangles and red circles, respectively; see inset for definition) of the actin contraction as a function of the fraction of fast-elongating actin filaments. Contraction is computed in a square region ( $4 \times 4 \mu\text{m}$ ) located within the pulsing region and indicates how homogeneous the network morphology becomes in the square region because of actin aggregation (see supplemental information for details). The inset shows the time evolution of actin contraction (fast elongation at 0.25%) with an indication of maximum and end-of-cycle values.

(C) Sum of tensile forces acting on quickly elongated filaments depending on the fraction of such filaments.

(D) A snapshot of a network with actin filaments elongated quickly from pointed ends, taken at  $t = 20 \text{ s}$ . The color schemes are identical to those used in the second and third rows of (A).

(E–G) Maximum actin contraction (E), motor contraction (F), and sum of tensile forces on elongated filaments (G), quantified at  $t = 20 \text{ s}$ . The motor contraction indicates how much the size of motor the population decreases compared with the initial size. In the control case, filaments are elongated from barbed ends, whereas in the other case, filaments are elongated from pointed ends.



the appearance of aggregates (Figures 6B; Video S15). As more actin filaments are elongated by formin, resistance to contraction increases, preventing local network collapse while enabling force transmission farther in the cortex.

Finally, to explore the specific impact of network polarity on contractility (Figure 5), we decided to probe the mechanics of networks displaying inverted architectures; we set out the numerical simulations to assemble actin networks with pointed ends emerging from the aster (by inverting formin polymerization dynamics, enhancing formin-mediated actin filament elongation at the pointed ends instead of the barbed end). We observed that actin and myosin contractions were enhanced (Figures 6D–6F). The forces acting on formin-elongated actin filaments were severely reduced (Figure 6G). With this network architecture, myosin motors moved toward the pulse center in a polarity sorting mechanism (Figure 6D; Wollrab et al., 2018) rather than pulling actin filaments to generate forces. These simulations showed that rapid assembly of a polar network architecture, under control of RhoA-driven pulses of formins, drives efficient actomyosin network contractility, supporting the remodeling of cell shape during pulsed contractions.

These simulation results show that actomyosin network architecture, largely governed by the kinetics of formin-mediated actin filament assembly, controls the mechanics of pulsed contraction, playing a key role to support the cellular function of pulsed contractions.

## DISCUSSION

Precise architectural organization of the actomyosin network is crucial for force generation at the cell cortex. How contractile architectures are assembled in rapidly remodeling actin networks is a multiple-answer question, especially during development, when force deployment is critical for embryo morphogenesis. Here we show that formins organize a polar actin network during cortical pulsed contraction in a biochemical system primed for rapid assembly.

Our detailed description of the kinetics of actin assembly by formins shows that formins elongate actin filaments at  $1.2 \mu\text{m} \cdot \text{s}^{-1}$ , or  $\sim 450$  monomers  $\cdot \text{s}^{-1}$ . Assuming that the elongation rate scales with actin concentration in a solvent-independent manner, formin velocity may be a good indicator of the modulations of free G-actin concentration in the cell. Recent work, however, has shown that, under saturating conditions, at concentrations of actin of more than  $200 \mu\text{M}$ , formin velocity actually does not scale with G-actin and profilin concentration and is controlled instead by the dissociation of profilin from the filament end (Funk et al., 2019). The decrease in elongation rates observed during cell division could then be caused by F-actin sequestration at the cleavage furrow, globally altering G-actin concentration or the actin/profilin ratio (Neidt et al., 2009).

Closely following the accumulation of two distinct populations of formins during pulsed contractions, we observed a puzzling kinetics sequence: elongating formin actually preceded recruited formins. We hypothesized that this sequence emerged directly from the kinetics of CYK-1-mediated actin assembly and designed a simple kinetics model recapitulating the main known characteristics of our system. In this model, the observed kinetics and

theoretical biochemical sequence could come together under a small set of specific assumptions: (1) barbed ends available for elongation are limiting, (2) formins are recruited in large numbers, and (3) the conversion reaction is fast compared with other reactions in the system. At this point, however, we still lack tools to conclusively explore a number of related issues. How does RhoA/CYK-1 recruitment to the cell surface (compared with purely cytoplasmic dynamics) impact barbed-end dynamics (2D versus 3D effects and reduction of dimensionality are discussed further in Methods S1)? What is the molecular nature of these barbed ends available for elongation (uncapped, capped by different factors than capping proteins, etc.)? When are barbed ends generated and by which mechanisms? What are the dynamics of capping during pulses? How many barbed ends are generated? Quantitatively at least, the concentration of formins seems to be consistent with an uncapped barbed end saturation mechanism: with a binding rate constant to uncapped barbed ends of  $\sim 0.029 \text{ nM}^{-1} \cdot \text{s}^{-1}$  and a local concentration at the pulse site of  $\sim 10 \text{ nM}$ , we would expect a half-life for barbed ends in the range of  $\sim 3 \text{ s}$ , consistent with our experimental observations (see supplemental information). We also do not yet have the resolution to explore the specific nature of the observed barbed ends. Are formins capable of heterodimerizing or co-assembling with other factors acting as competitive inhibitors, and could this lead to formation of inactive barbed ends?

Our numerical simulations also point to an important role of the long actin filaments assembled by formins because they seem to efficiently transmit forces in the network across long distances and avoid local network collapse. Future studies may leverage optogenetics tools to locally tune the activity of formins and test their mechanical function in cortical actomyosin contractility independent of their function in the global assembly and balance of the actin cortex.

Strikingly, the geometry of the assembled network is controlled by the geometry of the upstream signaling factors: local RhoA activation drives assembly of a polar actin network. This suggests that, at this scale, the actin architecture seems to be fundamentally driven by the spatial patterning of assembly kinetics rather than by reorganization of the actin cytoskeleton by the mechanical motor activity of myosin II (Reymann et al., 2016).

This architecture of the assembled structure, with myosin II recruited at the center of a polar actin network, barbed ends pointing out, is well tuned for actomyosin contractility. Our numerical simulations show that, although actomyosin networks can generate tension in the absence of a specific network architecture, actomyosin networks perform differently depending on their organization, and the contractile efficiency of the actomyosin network remains functionally linked to their geometry. RhoA signaling therefore converts a chemical RhoA gradient into a polar actin network architecture with a structure well adapted to the contractile function of actomyosin pulses in morphogenesis.

With precisely timed cell cycles, similar in duration to the ones in *Drosophila* syncytial embryos, lasting  $\sim 10'$ , *C. elegans* embryonic early development cell cycles unfold very fast (Brauchle et al., 2003), in particular compared with other early embryos; for instance, mouse embryos (20 h; Yamagata and FitzHarris, 2013), sea urchins (150 min; Chassé et al., 2016), and even ascidians ( $\sim 30$  min; Dumollard et al., 2013). In *C. elegans*, the

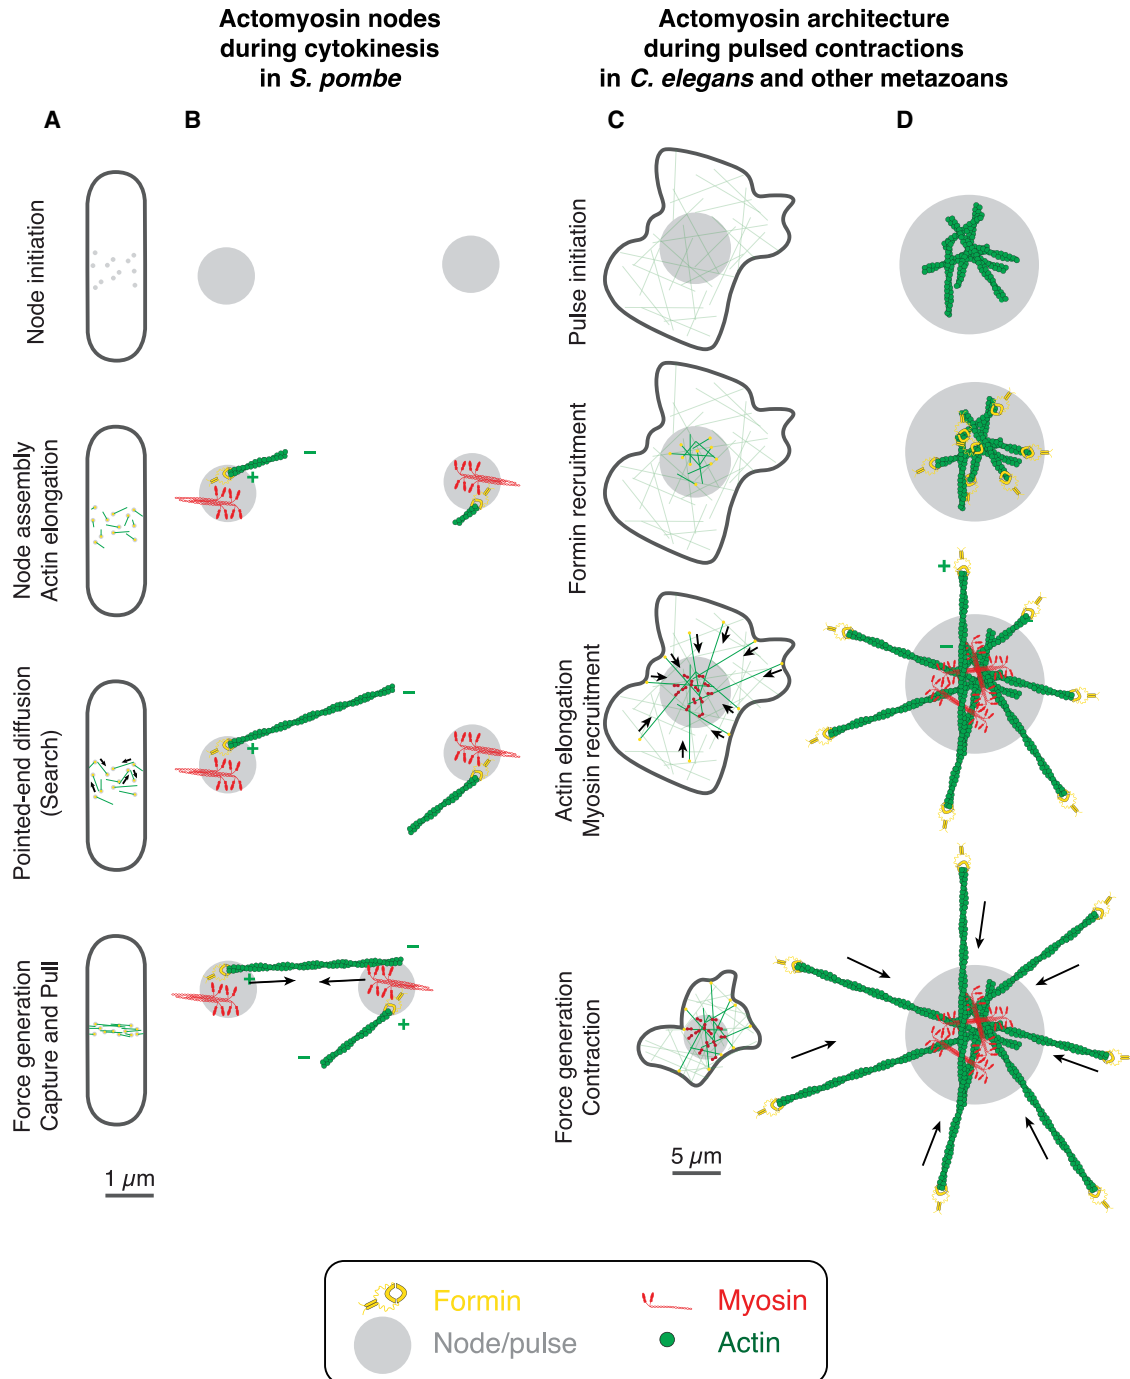

**Figure 7. Compared analysis of contractility between pulsed contractility in metazoans (*Drosophila* and *C. elegans*) and yeast**

(A and B) During cytokinesis in *Schizosaccharomyces pombe*, nodes form, cluster, and align, forming the contraction to drive cell division, with a process scale size of 1–2  $\mu\text{m}$ . Comparatively, in metazoans, pulsed contractions drive apical constriction over 10–50  $\mu\text{m}$  (A). The formin Cdc12p is recruited in the nodes and drives filament elongation (B). Pointed ends of filaments are proposed to diffuse locally and explore their environment until they are captured and pulled by Myo2p myosin filaments of another node.

(C and D) During pulsed contractions in *C. elegans*, Rho recruits formins, which elongate actin filaments, followed by myosin recruitment in the pulse center (C). Processive actin elongation by formins, recruited at the pulse site under control of Rho, drives formation of a polar actin network initiated at the pulse and extending more than 10  $\mu\text{m}$  from the pulse, with actin barbed-end pointing outward (D). Myosin recruited by Rho in the center of the pulse then efficiently drives actin network contraction, pulling on actin cables assembled during the pulse to “reel in” the network toward the center of the pulse. A model inspired by the SCPR model has been proposed previously to account for contractility in cultured cells treated with small doses of LatA (Luo et al., 2013), supported by the observed recruitment of myosin at the pulse center and between pulses. In our system, we did not observe such myosin recruitment, suggesting that the two systems might be organized differently.

10-min cycles are divided roughly equally into  $\sim 5$  min for mitosis and 5-min interphase with cortical pulses. As a consequence, cell polarity, compartmentalization, and cell shape changes are heavily constrained in time. An actin network primed for fast assembly, together with the polar architecture of actomyosin pulsed contractions, may set the stage for rapid and efficient contractions and cell shape changes. During gastrulation, this very same organization may thus drive fast apical constriction and subsequently timely internalization of endodermal cells.

### Limitations of the study

Our study does not yet account for the interaction of other actin interaction partners at the barbed end, such as capping proteins or other formins, and our computational model does not account for signaling pathways governing pulsatile RhoA activation. Additional information about these players may thus help to interpret the results presented in this study.

### Conclusions

Actomyosin network contractility is a key conserved feature of eukaryotic cells. Biochemically, the contractile structure assembled in *C. elegans* is similar to the nodes assembled in fission yeast during contractile ring assembly: formin actin filament elongators, myosin II motors, and actin cables (Vavylonis et al., 2008; Munro et al., 2004). However, several key differences separate the two contractile modules. Structurally, the sizes of the biological systems diverge strongly. At the level of the cell, a fission yeast cell is  $\sim 14$   $\mu\text{m}$  long and 3  $\mu\text{m}$  wide during cell division, compared with 50  $\mu\text{m}$  in length and 30  $\mu\text{m}$  in width for the *C. elegans* embryo (Figures 7A and 7B). The two contractile macromolecular assemblies are also very different; fission yeast nodes are less than 600 nm wide and initially distant by less than 1  $\mu\text{m}$  on average, whereas *C. elegans* actomyosin pulses are 3–5  $\mu\text{m}$  wide and separated by 5–10  $\mu\text{m}$ . The two systems are also biochemically distinct. The fission yeast formin Cdc12p elongates actin filaments with high processivity ( $k_{\text{off}}$ ,  $\sim 7 \times 10^{-5} \text{ s}^{-1}$ ) but slow speed (10.6 monomers  $\cdot \text{s}^{-1}$  at 1.5  $\mu\text{M}$  [actin], 4  $\mu\text{M}$  [SpPRF], a fission yeast profilin), whereas the *C. elegans* formin CYK-1 elongates actin filaments with a lower processivity ( $k_{\text{off}}$ ,  $\sim 4 \times 10^{-3} \text{ s}^{-1}$ ) but much higher speed (63.2 monomers  $\cdot \text{s}^{-1}$  at 1.5  $\mu\text{M}$  [actin] and 4  $\mu\text{M}$  [PFN-1], a *C. elegans* profilin). In the Search-Capture-Pull-Release (SCPR) model and related models, actin filament elongation takes place from a static barbed end (Pollard and Wu, 2010; Vavylonis et al., 2008). However, in *C. elegans*, a similar mechanism would result in filament buckling or stalling in actin filament elongation. To drive the same functional output, contraction, the molecular homologs assemble a structurally distinct, geometrically opposite architecture that is tuned to the scale of the biological system, revealing here an interesting instance of the tinkering of evolution.

### STAR★METHODS

Detailed methods are provided in the online version of this paper and include the following:

- KEY RESOURCES TABLE
- RESOURCE AVAILABILITY

- Lead contact
- Materials availability
- Data and code availability
- EXPERIMENTAL MODELS AND SUBJECT DETAILS
  - *C. elegans* culture and strains
- METHOD DETAILS
  - Endogenous cyk-1 GFP knock-in transgenic worm generation using CRISPR/Cas9
  - RNA interference
  - Imaging conditions
  - Tuning GFP levels to achieve single-molecule densities
  - Drug perfusion experiments
  - Assessing potential adversary effects of compression, laser exposure and GFP fusion
  - Single-molecule detection and tracking
  - Computing mean squared displacement (MSD) and alpha parameter
  - Estimating *in vivo* actin assembly parameters
  - Formin speed measurement analysis
  - Two-color imaging microscopy
  - Tracking of individual pulses of CYK-1::GFP
  - Single particles tracking and pulse analysis pipeline in Matlab
  - Numerical simulation of formin local recruitment
  - Overview of the computational model of actomyosin networks mechanics
- QUANTIFICATION AND STATISTICAL ANALYSIS

### SUPPLEMENTAL INFORMATION

Supplemental information can be found online at <https://doi.org/10.1016/j.celrep.2022.110868>.

### ACKNOWLEDGMENTS

We thank Stephan Grill, Ronen Zaidel-Bar, and Geraldine Seydoux for worm strains. We thank Marie Breau and Michel Labouesse for critical reading of the manuscript; Antoine Jégou, Michel Labouesse, Marie Breau, Flora Llense, and Teresa Ferraro for valuable discussions; members of the Robin laboratory for discussions and technical assistance; and the IBPS imaging facility, and in particular Susanne Bolte and France Lam, for excellent technical support. This work was supported by the ATIP/Avenir program (F.B.R.), the ERC-Tremplin program of CNRS (F.B.R.), the Marie Curie Program MSCA-IF 661451 (F.B.R.), and the National Institutes of Health (1R01GM126256).

### AUTHOR CONTRIBUTIONS

Conceptualization, F.B.R.; methodology, S.P.G., V.C., T.K., and F.B.R.; software, S.B., F.B.R., J.L., and T.K.; formal analysis, V.C., S.P.G., J.L., T.K., and F.B.R.; resources, C.N.P., S.K.S., A.-C.R., and T.K.; writing – original draft, F.B.R.; writing – review & editing, S.P.G., V.C., T.K., and F.B.R.; visualization, V.C., S.P.G., T.K., and F.B.R.; supervision, T.K. and F.B.R.; project administration, F.B.R.; funding acquisition, T.K. and F.B.R.

### DECLARATION OF INTERESTS

The authors declare no competing interests.

Received: January 22, 2021

Revised: March 13, 2022

Accepted: May 5, 2022

Published: May 31, 2022

## SUPPORTING CITATIONS

The following references appear in the supplemental information: Axelrod and Wang, 1994; Berens, 2009; Berg and Purcell, 1977; Breitsprecher and Goode, 2013; Clift et al., 2005; Delbrück and Adam, 1968; Drenckhahn and Pollard, 1986; Ferrer et al., 2008; Fujiwara et al., 2014; Isambert et al., 1995; Kholodenko et al., 2000; Kishino and Yanagida, 1988; Meyer and Aebi, 1990; Miyoshi et al., 2006; Pollard and Borisy, 2003; Schafer et al., 1996; Shekhar et al., 2016; Tyska et al., 1999; Underhill and Doyle, 2004.

## REFERENCES

- Agarwal, P., and Zaidel-Bar, R. (2019). Principles of actomyosin regulation in vivo. *Trends Cell Biol.* 29, 150–163. <https://doi.org/10.1016/j.tcb.2018.09.006>.
- Amin, N.M., Hu, K., Pruyne, D., Terzic, D., Bretscher, A., and Liu, J. (2007). A Zn-finger/FH2-domain containing protein, FOZI-1, acts redundantly with Ce-MyoD to specify striated body wall muscle fates in the *Caenorhabditis elegans* postembryonic mesoderm. *Development* 134, 19–29. <https://doi.org/10.1242/dev.02709>.
- Amin, N.M., Lim, S.-E., Shi, H., Chan, T.L., and Liu, J. (2009). A conserved six-eye cassette acts downstream of Wnt signaling to direct non-myogenic versus myogenic fates in the *C. Elegans* postembryonic mesoderm. *Dev. Biol.* 331, 350–360. <https://doi.org/10.1016/j.ydbio.2009.05.538>.
- Axelrod, D., and Wang, M.D. (1994). Reduction-of-Dimensionality kinetics at reaction-limited cell surface receptors. *Biophys. J.* 66 (3 Pt 1), 588–600. [https://doi.org/10.1016/s0006-3495\(94\)80834-3](https://doi.org/10.1016/s0006-3495(94)80834-3).
- Bell, G.I. (1978). Models for the specific adhesion of cells to cells. *Science* 200, 618–627. <https://doi.org/10.1126/science.347575>.
- Bell, K.R., Werner, M.E., Doshi, A., Cortes, D.B., Sattler, A., Vuong-Brender, T., Labouesse, M., and Maddox, A.S. (2020). Novel cytokinetic ring components drive negative feedback in cortical contractility. *Mol. Biol. Cell* 31, 1623–1636. <https://doi.org/10.1091/mbc.E20-05-0304>.
- Bement, W.M., Leda, M., Moe, A., Kita, A.M., Larson, M.E., Golding, A., Pfeuti, C., Su, K.C., Miller, A., Goryachev, A., and von Dassow, G. (2015). Activator-inhibitor coupling between Rho signalling and actin assembly makes the cell cortex an excitable medium. *Nat. Cell Biol.* 17, 1471–1483. <https://doi.org/10.1038/ncb3251>.
- Berens, P. (2009). CircStat: a MATLAB toolbox for circular statistics. *J. Stat. Softw.* 31, 1–21. <https://doi.org/10.18637/jss.v031.i10>.
- Berg, H.C., and Purcell, E.M. (1977). Physics of chemoreception. *Biophys. J.* 20, 193–219. [https://doi.org/10.1016/S0006-3495\(77\)85544-6](https://doi.org/10.1016/S0006-3495(77)85544-6).
- Bidone, T.C., Jung, W., Maruri, D., Borau, C., Kamm, R.D., and Kim, T. (2017). Morphological transformation and force generation of active cytoskeletal networks. *PLoS Comput. Biol.* 13, e1005277. <https://doi.org/10.1371/journal.pcbi.1005277>.
- Blanchoin, L., Boujemaâ-Paterski, R., Sykes, Cécile, and Plastino, Julie (2014). Actin dynamics, architecture, and mechanics in cell motility. *Physiol. Rev.* 94, 235–263. <https://doi.org/10.1152/physrev.00018.2013>.
- Bombardier, J.P., Eskin, J.A., Jaiswal, R., Corrêa, I.R., Xu, M.-Q., Goode, B.L., and Gelles, J. (2015). Single-molecule visualization of a formin-capping protein ‘decision complex’ at the actin filament barbed end. *Nat. Commun.* 6, 8707. <https://doi.org/10.1038/ncomms9707>.
- Brauchle, M., Baumer, K., and Gönczy, P. (2003). Differential activation of the DNA replication checkpoint contributes to asynchrony of cell division in *C. Elegans* embryos. *Curr. Biol.* 13, 819–827. [https://doi.org/10.1016/s0960-9822\(03\)00295-1](https://doi.org/10.1016/s0960-9822(03)00295-1).
- Breitsprecher, D., and Goode, B.L. (2013). Formins at a glance. *J. Cell Sci.* 126 (Pt 1), 1–7. <https://doi.org/10.1242/jcs.107250>.
- Carvalho, A., Olson, S.K., Gutierrez, E., Zhang, K., Noble, L.B., Zanin, E., Desai, A., Groisman, A., and Oegema, K. (2011). Acute drug treatment in the early *C. Elegans* embryo. *PLoS One* 6, e24656. <https://doi.org/10.1371/journal.pone.0024656>.
- Chassé, H., Mulner-Lorillon, O., Boulben, S., Gliippa, V., Morales, J., and Cormier, P. (2016). Cyclin B translation depends on mTOR activity after fertilization in sea urchin embryos. *PLoS One* 11, e0150318. <https://doi.org/10.1371/journal.pone.0150318>.
- Chen, Q., Nag, S., and Pollard, T.D. (2012). Formins filter modified actin subunits during processive elongation. *J. Struct. Biol.* 177, 32–39. <https://doi.org/10.1016/j.jsb.2011.10.005>.
- Clift, R., Grace, J.R., and Weber, M.E. (2005). *Bubbles, Drops, and Particles* (New York: Dover Publications).
- Coravos, J.S., and Martin, A.C. (2016). Apical sarcomere-like actomyosin contracts nonmuscle *Drosophila* epithelial cells. *Dev. Cell* 39, 346–358. <https://doi.org/10.1016/j.devcel.2016.09.023>.
- Courtemanche, N. (2018). Mechanisms of formin-mediated actin assembly and dynamics. *Biophys. Rev.* 10, 1553–1569. <https://doi.org/10.1007/s12551-018-0468-6>.
- Courtemanche, N., Lee, J.Y., Pollard, T.D., and Greene, E.C. (2013). Tension modulates actin filament polymerization mediated by formin and profilin. *Proc. Natl. Acad. Sci. U S A* 110, 9752–9757. <https://doi.org/10.1073/pnas.1308257110>.
- Crocker, J.C., and Grier, D.G. (1996). Methods of digital video microscopy for colloidal studies. *J. Colloid Interf. Sci.* 179, 298–310. <https://doi.org/10.1006/jcis.1996.0217>.
- Delbrück, M., and Adam, G. (1968). Reduction of dimensionality in biological diffusion processes. In *Structural Chemistry and Molecular Biology*, Alexander Rich and Norman Davidson, eds. (San Francisco and London: W.H. Freeman and Co.), pp. 198–215.
- Dickinson, D.J., Schwager, F., Pintard, L., Gotta, M., and Goldstein, B. (2017). A single-cell biochemistry approach reveals PAR complex dynamics during cell polarization. *Dev. Cell* 42, 416–434.e11.
- Dickinson, D.J., Ward, J.D., Reiner, D.J., and Goldstein, B. (2013). Engineering the *Caenorhabditis elegans* genome using Cas9-triggered homologous recombination. *Nat Methods* 10 (10), 1028–1034. <https://doi.org/10.1038/nmeth.2641>.
- Drenckhahn, D., and Pollard, T.D. (1986). Elongation of actin filaments is a diffusion-limited reaction at the barbed end and is accelerated by inert macromolecules. *J. Biol. Chem.* 261, 12754–12758. [https://doi.org/10.1016/s0021-9258\(18\)67157-1](https://doi.org/10.1016/s0021-9258(18)67157-1).
- Dumollard, R., Hebras, C., Besnardeau, L., and McDougall, A. (2013). Beta-catenin patterns the cell cycle during maternal-to-zygotic transition in urochordate embryos. *Dev. Biol.* 384, 331–342. <https://doi.org/10.1016/j.ydbio.2013.10.007>.
- Erdmann, T., and Schwarz, U.S. (2012). Stochastic force generation by small ensembles of myosin II motors. *Phys. Rev. Lett.* 108, 188101. <https://doi.org/10.1103/PhysRevLett.108.188101>.
- Erdmann, T., Albert, P.J., and Schwarz, U.S. (2013). Stochastic dynamics of small ensembles of non-processive molecular motors: the parallel cluster model. *J. Chem. Phys.* 139, 175104. <https://doi.org/10.1063/1.4827497>.
- Ferrer, J.M., Lee, H., Chen, J., Pelz, B., Nakamura, F., Kamm, R.D., and Lang, M.J. (2008). Measuring molecular rupture forces between single actin filaments and actin-binding proteins. *Proc. Natl. Acad. Sci. U S A* 105, 9221–9226. <https://doi.org/10.1073/pnas.0706124105>.
- Fujiwara, I., Rimmert, K., Piszczek, G., and Hammer, J.A. (2014). Capping protein regulatory cycle driven by CARMIL and v-1 may promote actin network assembly at protruding edges. *Proc. Natl. Acad. Sci. U S A* 111, E1970–E1979. <https://doi.org/10.1073/pnas.1313738111>.
- Funk, J., Merino, F., Venkova, L., Heydenreich, L., Kierfeld, J., Vargas, P., Raunser, S., Piel, M., and Bieling, P. (2019). Profilin and formin constitute a pacemaker system for robust actin filament growth. *eLife* 8, e50963. <https://doi.org/10.7554/eLife.50963>.
- He, L., Wang, X., Tang, H.L., and Montell, D.J. (2010). Tissue elongation requires oscillating contractions of a basal actomyosin network. *Nat. Cell Biol.* 12, 1133–1142. <https://doi.org/10.1038/ncb2124>.



- Higashida, C., Miyoshi, T., Fujita, A., Ocegüera-Yanez, F., Monypenny, J., Andou, Y., Narumiya, S., and Watanabe, N. (2004). Actin polymerization-driven molecular movement of mDia1 in living cells. *Science* 303, 2007–2010. <https://doi.org/10.1126/science.1093923>.
- Higashida, C., Suetsugu, S., Tsuji, T., Monypenny, J., Narumiya, S., and Watanabe, N. (2008). G-actin regulates rapid induction of actin nucleation by mDia1 to restore cellular actin polymers. *J. Cell Sci.* 121 (Pt 20), 3403–3412. <https://doi.org/10.1242/jcs.030940>.
- Higashida, C., Kiuchi, T., Akiba, Y., Mizuno, H., Maruoka, M., Narumiya, S., Mizuno, K., and Watanabe, N. (2013). F- and G-actin homeostasis regulates mechanosensitive actin nucleation by formins. *Nat. Cell Biol.* 15, 395–405. <https://doi.org/10.1038/ncb2693>.
- Higgs, H.N. (2005). Formin proteins: a domain-based approach. *Trends Biochem. Sci.* 30, 342–353. <https://doi.org/10.1016/j.tibs.2005.04.014>.
- Howard, J. (2001). *Mechanics of Motor Proteins and the Cytoskeleton* (Sinauer Associates, Inc), pp. 1–7.
- Isambert, H., Venier, P., Maggs, A.C., Fattoum, A., Kassab, R., Pantaloni, D., and Carlier, M.F. (1995). Flexibility of actin filaments derived from thermal fluctuations. *J. Biol. Chem.* 270, 11437–11444. <https://doi.org/10.1074/jbc.270.19.11437>.
- Jégou, A., Carlier, M.-F., and Romet-Lemonne, G. (2013). Formin mDia1 senses and generates mechanical forces on actin filaments. *Nat. Commun.* 4, 1883. <https://doi.org/10.1038/ncomms2888>.
- Johnston, R.J., Copeland, J.W., Fasnacht, M., Etchberger, J.F., Liu, J., Honig, B., and Hobert, O. (2006). An unusual Zn-finger/FH2 domain protein controls a left/right asymmetric neuronal fate decision in *C. Elegans*. *Development* 133, 3317–3328. <https://doi.org/10.1242/dev.02494>.
- Jung, W., Murrell, M.P., and Kim, T. (2015). F-actin cross-linking enhances the stability of force generation in disordered actomyosin networks. *Comput. Part. Mech.* 2 (4), 317–327. <https://doi.org/10.1007/s40571-015-0052-9>.
- Kamath, R.S., and Ahringer, J. (2003). Genome-wide RNAi screening in *Caenorhabditis elegans*. *Methods* 30, 313–321. [https://doi.org/10.1016/s1046-2023\(03\)00050-1](https://doi.org/10.1016/s1046-2023(03)00050-1).
- Mi-Mi, L., Votra, S., Kemphues, K., Bretscher, A., and Pruyne, D. (2012). Z-line formins promote contractile lattice growth and maintenance in striated muscles of *C. Elegans*. *J. Cell Biol.* 198, 87–102. <https://doi.org/10.1083/jcb.201202053>.
- Kholodenko, B.N., Hoek, J.B., and Westerhoff, H.V. (2000). Why cytoplasmic signalling proteins should be recruited to cell membranes. *Trends Cell Biol.* 10, 173–178. [https://doi.org/10.1016/s0962-8924\(00\)01741-4](https://doi.org/10.1016/s0962-8924(00)01741-4).
- Kim, T. (2015). Determinants of contractile forces generated in disorganized actomyosin bundles. *Biomech. Model. Mechanobiol.* 14, 345–355. <https://doi.org/10.1007/s10237-014-0608-2>.
- Kim, H.Y., and Davidson, L.A. (2011). Punctuated actin contractions during convergent extension and their permissive regulation by the non-canonical Wnt-signaling pathway. *J. Cell Sci.* 124, 635–646. <https://doi.org/10.1242/jcs.067579>.
- Kim, T., Hwang, W., Lee, H., and Kamm, R.D. (2009). Computational analysis of viscoelastic properties of crosslinked actin networks. *PLoS Comput. Biol.* 5, e1000439. <https://doi.org/10.1371/journal.pcbi.1000439>.
- Kim, H., Ishidate, T., Ghanta, K.S., Seth, M., Conte, D., Jr., Shirayama, M., and Mello, C.C. (2014). A co-CRISPR strategy for efficient genome editing in *Caenorhabditis elegans*. *Genetics* 197 (4), 1069–1080. <https://doi.org/10.1534/genetics.114.166389>.
- Kishino, A., and Yanagida, T. (1988). Force measurements by micromanipulation of a single actin filament by glass needles. *Nature* 334, 74–76. <https://doi.org/10.1038/334074a0>.
- Koenderink, G.H., and Paluch, E.K. (2018). Architecture shapes contractility in actomyosin networks. *Curr. Opin. Cell Biol.* 50, 79–85. <https://doi.org/10.1016/j.cob.2018.01.015>.
- Kreten, F.H., Hoffmann, Ch, Riveline, D., and Kruse, K. (2018). Active bundles of polar and bipolar filaments. *Phys. Rev. E* 98, 012413. <https://doi.org/10.1103/PhysRevE.98.012413>.
- Kubota, H., Miyazaki, M., Ogawa, T., Shimozawa, T., Kinoshita, K., and Ishiwata, S. (2017). Biphasic effect of profilin impacts the formin mDia1 force-sensing mechanism in actin polymerization. *Biophys. J.* 113, 461–471. <https://doi.org/10.1016/j.bpj.2017.06.012>.
- Lecuit, T., and Lenne, P.-F. (2007). Cell surface mechanics and the control of cell shape, tissue patterns and morphogenesis. *Nat. Rev. Mol. Cell Biol.* 8, 633–644. <https://doi.org/10.1038/nrm2222>.
- Lenz, M., Gardel, M.L., and Dinner, A.R. (2012a). Requirements for contractility in disordered cytoskeletal bundles. *New J. Phys.* 14, 033037. <https://doi.org/10.1088/1367-2630/14/3/033037>.
- Lenz, M., Thoresen, T., Gardel, M.L., and Dinner, A.R. (2012b). Contractile units in disordered actomyosin bundles arise from F-actin buckling. *Phys. Rev. Lett.* 108, 238107. <https://doi.org/10.1103/PhysRevLett.108.238107>.
- Li, F., and Higgs, H.N. (2003). The mouse formin mDia1 is a potent actin nucleation factor regulated by autoinhibition. *Curr. Biol.* 13, 1335–1340. [https://doi.org/10.1016/s0960-9822\(03\)00540-2](https://doi.org/10.1016/s0960-9822(03)00540-2).
- Li, F., and Higgs, H.N. (2005). Dissecting requirements for auto-inhibition of actin nucleation by the formin, mDia1. *J. Biol. Chem.* 280, 6986–6992. <https://doi.org/10.1074/jbc.M411605200>.
- Li, J., Biel, T., Lomada, P., Yu, Q., and Kim, T. (2017). Buckling-induced F-actin fragmentation modulates the contraction of active cytoskeletal networks. *Soft Matter* 13, 3213–3220. <https://doi.org/10.1039/c6sm02703b>.
- Linsmeier, I., Banerjee, S., Oakes, P.W., Jung, W., Kim, T., and Murrell, M.P. (2016). Disordered actomyosin networks are sufficient to produce cooperative and telescopic contractility. *Nat. Commun.* 7, 12615–12619. <https://doi.org/10.1038/ncomms12615>.
- Luo, W., Yu, C.H., Lieu, Z.Z., Allard, J., Mogilner, A., Sheetz, M.P., and Bershadsky, A.D. (2013). Analysis of the local organization and dynamics of cortical actin networks. *J. Cell Biol.* 202, 1057–1073. <https://doi.org/10.1083/jcb.201210123>.
- Maddox, A.S., Habermann, B., Desai, A., and Oegema, K. (2005). Distinct roles for two *C. Elegans* anillins in the gonad and early embryo. *Development* 132, 2837–2848. <https://doi.org/10.1242/dev.01828>.
- Mak, M., Zaman, M.H., Kamm, R.D., and Kim, T. (2016). Interplay of active processes modulates tension and drives phase transition in self-renewing, motor-driven cytoskeletal networks. *Nat. Commun.* 7, 10323. <https://doi.org/10.1038/ncomms10323>.
- Martin, A.C., Kaschube, M., and Wieschaus, E.F. (2009). Pulsed contractions of an actin-myosin network drive apical constriction. *Nature* 457, 495–499. <https://doi.org/10.1038/nature07522>.
- Mayer, M., Depken, M., Bois, J.S., Jülicher, F., and Grill, Stephan W. (2010). Anisotropies in cortical tension reveal the physical basis of polarizing cortical flows. *Nature* 467, 617–621. <https://doi.org/10.1038/nature09376>.
- Meyer, R.K., and Aebi, U. (1990). Bundling of actin filaments by alpha-actinin depends on its molecular length. *J. Cell Biol.* 110, 2013–2024. <https://doi.org/10.1083/jcb.110.6.2013>.
- Michaux, J.B., Francois B Robin, W.M.M., and Munro, E.M. (2018). Excitable RhoA dynamics drive pulsed contractions in the early *C. Elegans* embryo. *J. Cell Biol.* 217, 4230–4252. <https://doi.org/10.1083/jcb.201806161>.
- Miller, A.L., and Bement, W.M. (2009). Regulation of cytokinesis by Rho GTPase flux. *Nat. Cell Biol.* 11, 71–77. <https://doi.org/10.1038/ncb1814>.
- Miyoshi, T., Tsuji, T., Higashida, C., Hertzog, M., Fujita, A., Narumiya, S., Scita, G., and Watanabe, N. (2006). Actin turnover-dependent fast dissociation of capping protein in the dendritic nucleation actin network: evidence of frequent filament severing. *J. Cell Biol.* 175, 947–955. <https://doi.org/10.1083/jcb.200604176>.
- Munjal, A., and Lecuit, T. (2014). Actomyosin networks and tissue morphogenesis. *Development* 141, 1789–1793. <https://doi.org/10.1242/dev.091645>.
- Munro, E., Nance, J., and Priess, J.R. (2004). Cortical flows powered by asymmetrical contraction transport PAR proteins to establish and maintain anterior-posterior polarity in the early *C. Elegans* embryo. *Dev. Cell* 7, 413–424. <https://doi.org/10.1016/j.devcel.2004.08.001>.



- Murthy, K., and Wadsworth, P. (2005). Myosin-II-dependent localization and dynamics of F-actin during cytokinesis. *Curr. Biol.* *15*, 724–731. <https://doi.org/10.1016/j.cub.2005.02.055>.
- Naganathan, S.R., Fürthauer, S., Nishikawa, M., Frank, J., and Grill, S.W. (2014). Active Torque Generation by the Actomyosin Cell Cortex Drives Left-Right Symmetry Breaking. *eLife* *3*, e04165. <https://doi.org/10.7554/eLife.04165>.
- Naganathan, S.R., Fürthauer, S., Rodriguez, J., Fievet, B.T., Jülicher, F., Ahinger, J., Cannistraci, C.V., and Grill, S.W. (2018). Morphogenetic degeneracies in the actomyosin cortex. *eLife* *7*, 354. <https://doi.org/10.7554/eLife.37677>.
- Nance, J., Munro, E.M., and Priess, J.R. (2003). C. Elegans PAR-3 and PAR-6 are required for apicobasal asymmetries associated with cell adhesion and gastrulation. *Development* *130*, 5339–5350. <https://doi.org/10.1242/dev.00735>.
- Nance, J., and Priess, J.R. (2002). Cell polarity and gastrulation in C. Elegans. *Development* *129*, 387–397. <https://doi.org/10.1242/dev.129.2.387>.
- Neidt, E.M., Scott, B.J., and Kovar, D.R. (2009). Formin differentially utilizes profilin isoforms to rapidly assemble actin filaments. *J. Biol. Chem.* *284*, 673–684. <https://doi.org/10.1074/jbc.M804201200>.
- Neidt, E.M., Skau, C.T., and Kovar, D.R. (2008). The cytokinesis formins from the nematode worm and fission yeast differentially mediate actin filament assembly. *J. Biol. Chem.* *283*, 23872–23883. <https://doi.org/10.1074/jbc.M803734200>.
- Nishikawa, M., Naganathan, S.R., Jülicher, F., and Grill, S.W. (2017). Controlling contractile instabilities in the actomyosin cortex. *eLife* *6*, e19595. <https://doi.org/10.7554/eLife.19595>.
- Oegema, K., and Hyman, A.A. (2006). Cell division. *WormBook*, 1–40. <https://doi.org/10.1895/wormbook.1.72.1>.
- Olson, S.K., Greenan, G., Desai, A., Müller-Reichert, T., and Oegema, K. (2012). Hierarchical assembly of the eggshell and permeability barrier in C. Elegans. *J. Cell Biol.* *198*, 731–748. <https://doi.org/10.1083/jcb.201206008>.
- Pelletier, V., Gal, N., Fournier, P., and Kilfoil, M.L. (2009). Microrheology of microtubule solutions and actin-microtubule composite networks. *Phys. Rev. Lett.* *102*, 188303. <https://doi.org/10.1103/PhysRevLett.102.188303>.
- Piekny, A., Werner, M., and Glotzer, M. (2005). Cytokinesis: welcome to the Rho zone. *Trends Cell Biol.* *15*, 651–658. <https://doi.org/10.1016/j.tcb.2005.10.006>.
- Pollard, T.D., and Borisy, G.G. (2003). Cellular motility driven by assembly and disassembly of actin filaments. *Cell* *112*, 453–465. [https://doi.org/10.1016/S0092-8674\(03\)00120-X](https://doi.org/10.1016/S0092-8674(03)00120-X).
- Pollard, T.D., and Wu, J.-Q. (2010). Understanding cytokinesis: lessons from fission yeast. *Nat. Rev. Mol. Cell Biol.* *11*, 149–155. <https://doi.org/10.1038/nrm2834>.
- Reymann, A.-C., Staniscia, F., Erzberger, A., Salbreux, G., and Grill, S.W. (2016). Cortical flow aligns actin filaments to form a furrow. *eLife* *5*, e17807. <https://doi.org/10.7554/eLife.17807>.
- Robin, F.B., McFadden, W.M., Yao, B., and Munro, E.M. (2014). Single-molecule analysis of cell surface dynamics in Caenorhabditis elegans embryos. *Nat. Methods* *11*, 677–682. <https://doi.org/10.1038/nmeth.2928>.
- Roh-Johnson, M., Shemer, G., Higgins, C.D., McClellan, J.H., Werts, A.D., Tulu, U.S., Gao, L., Betzig, E., Kiehart, D.P., and Goldstein, B. (2012). Triggering a cell shape change by exploiting preexisting actomyosin contractions. *Science* *335*, 1232–1235. <https://doi.org/10.1126/science.1217869>.
- Rottner, K., Faix, J., Bogdan, S., Linder, S., and Kerkhoff, E. (2017). Actin assembly mechanisms at a glance. *J. Cell Sci.* *130*, 3427–3435. <https://doi.org/10.1242/jcs.206433>.
- Schafer, D.A., Jennings, P.B., and Cooper, J.A. (1996). Dynamics of capping protein and actin assembly in vitro: uncapping barbed ends by polyphosphoinositides. *J. Cell Biol.* *135*, 169–179. <https://doi.org/10.1083/jcb.135.1.169>.
- Shekhar, S., Kerleau, M., Kühn, S., Pernier, J., Romet-Lemonne, G., Jégou, A., and Carlier, M.-F. (2015). Formin and capping protein together embrace the actin filament in a ménage à trois. *Nat. Commun.* *6*, 8730. <https://doi.org/10.1038/ncomms9730>.
- Shekhar, S., Pernier, J., and Carlier, M.-F. (2016). Regulators of actin filament barbed ends at a glance. *J. Cell Sci.* *129*, 1085–1091. <https://doi.org/10.1242/jcs.179994>.
- Skruber, K., Read, T.-A., and Vitriol, E.A. (2018). Reconsidering an active role for G-actin in cytoskeletal regulation. *J. Cell Sci.* *131*, jcs203760. <https://doi.org/10.1242/jcs.203760>.
- Suman, S.K., Daday, C., Ferraro, T., Vuong-Brender, T., Tak, S., Quintin, S., Robin, F., Gräter, F., and Labouesse, M. (2019). The plakin domain of C. elegans VAB-10/plectin acts as a hub in a mechanotransduction pathway to promote morphogenesis. *Development*. Dec 13;(24):dev183780. doi: 10.1242/dev.183780. <https://doi.org/10.1242/dev.183780>.
- Swan, K.A., Severson, A.F., Carter, J.C., Martin, P.R., Schnabel, H., Schnabel, R., and Bowerman, B. (1998). Cyk-1: a C. Elegans FH gene required for a late step in embryonic cytokinesis. *J. Cell Sci.* *111* (Pt 14), 2017–2027. <https://doi.org/10.1242/jcs.111.14.2017>.
- Timmons, L., and Fire, A. (1998). Specific interference by ingested dsRNA. *Nature* *395*, 854. <https://doi.org/10.1038/27579>.
- Tse, Y.C., Werner, M., Longhini, K.M., Labbé, J.-C., Goldstein, B., and Glotzer, M. (2012). RhoA activation during polarization and cytokinesis of the early Caenorhabditis elegans embryo is differentially dependent on NOP-1 and CYK-4. *Mol. Biol. Cell* *23*, 4020–4031. <https://doi.org/10.1091/mbc.E12-04-0268>.
- Tyska, M.J., Dupuis, D.E., Guilford, W.H., Patlak, J.B., Waller, G.S., Trybus, K.M., Warshaw, D.M., and Lowey, S. (1999). Two heads of myosin are better than one for generating force and motion. *Proc. Natl. Acad. Sci. U S A* *96*, 4402–4407. <https://doi.org/10.1073/pnas.96.8.4402>.
- Underhill, P.T., and Doyle, P.S. (2004). On the coarse-graining of polymers into bead-spring chains. *J. Non-Newtonian Fluid Mech.* *122*, 3–31. <https://doi.org/10.1016/j.jnnfm.2003.10.006>.
- Vavylonis, D., Wu, J.-Q., Hao, S., O’Shaughnessy, B., and Pollard, T.D. (2008). Assembly mechanism of the contractile ring for cytokinesis by fission yeast. *Science* *319*, 97–100. <https://doi.org/10.1126/science.1151086>.
- Wollrab, V., Belmonte, J.M., Baldauf, L., Leptin, M., Nédélec, F., and Koenderink, G.H. (2018). Polarity sorting drives remodeling of actin-myosin networks. *J. Cell Sci.* *132*, jcs219717. <https://doi.org/10.1242/jcs.219717>.
- Wu, J.-Q., and Pollard, T.D. (2005). Counting cytokinesis proteins globally and locally in fission yeast. *Science* *310*, 310–314. <https://doi.org/10.1126/science.1113230>.
- Yamagata, K., and FitzHarris, G. (2013). 4D imaging reveals a shift in chromosome segregation dynamics during mouse pre-implantation development. *Cell Cycle* *12*, 157–165. <https://doi.org/10.4161/cc.23052>.
- Yu, Q., Li, J., Murrell, M.P., and Kim, T. (2018). Balance between force generation and relaxation leads to pulsed contraction of actomyosin networks. *Biophys. J.* *115*, 2003–2013. <https://doi.org/10.1016/j.bpj.2018.10.008>.
- Zhou, M., and Wang, Y.-L. (2008). Distinct pathways for the early recruitment of myosin II and actin to the cytokinetic furrow. *Mol. Biol. Cell* *19*, 318–326. <https://doi.org/10.1091/mbc.e07-08-0783>.

## STAR★METHODS

### KEY RESOURCES TABLE

| REAGENT or RESOURCE                                  | SOURCE                                                | IDENTIFIER                                                                                                 |
|------------------------------------------------------|-------------------------------------------------------|------------------------------------------------------------------------------------------------------------|
| <b>Bacterial and virus strains</b>                   |                                                       |                                                                                                            |
| L4417 plasmid                                        | Kamath feeding library<br>(Kamath and Ahringer, 2003) | NA                                                                                                         |
| HT115(DE3) bacteria                                  |                                                       | NA                                                                                                         |
| <b>Chemicals, peptides, and recombinant proteins</b> |                                                       |                                                                                                            |
| Latrunculin A                                        | Sigma                                                 | L5163                                                                                                      |
| Nocodazole                                           | Sigma                                                 | M1404                                                                                                      |
| <b>Experimental models: Organisms/strains</b>        |                                                       |                                                                                                            |
| WT strain N2                                         | CGC                                                   | Wild-type Bristol strain                                                                                   |
| EM302                                                | Michaux et al., 2018                                  | mgSi5[cb-UNC-119 (+) GFP::ANI-1(AH+PH)]II;<br>nmy-2(cp52[nmy-2::mKate2 + unc-119(+)] I;<br>unc-119(ed3) II |
| FBR104                                               | This study                                            | cyk-1(jme06[cyk-1::mNeon])III                                                                              |
| FBR106                                               | This study                                            | cyk-1(jme06[cyk-1::mNeon])III; gesIs001[Pmex-5::<br>Lifeact::mKate::nmy-2UTR, unc-119+]                    |
| FBR160                                               | This study                                            | cyk-1(jme14[cyk-1::eGFP])III                                                                               |
| FBR175                                               | This study                                            | cyk-1(jme14[cyk-1::eGFP])III; nmy-2(cp52[nmy-2::<br>mKate2 + unc-119(+)] I; unc-119(ed3) III               |
| JH1541                                               | Courtesy of G. Seydoux                                | unc-119(ed4); pJH7.03 [unc-119; pie-1::GFP::actinpie-1 3'UTR]                                              |
| LP229                                                | Dickinson et al., 2017                                | nmy-2(cp52[nmy-2::mKate2 + LoxP unc-119(+)<br>LoxP] I; unc-119 (ed3) III                                   |
| SWG001                                               | Reymann et al., 2016                                  | gesIs001[Pmex-5::Lifeact::mKate::nmy-2UTR, unc-119+]                                                       |
| SWG282                                               | This study                                            | gesIs008[Pcyk-1::CYK-1::GFP::cyk-1UTR, unc-119+]                                                           |
| <b>Software and algorithms</b>                       |                                                       |                                                                                                            |
| Computational model of actomyosin mechanics          | Kim Taeyoon, this study                               | 10.5281/zenodo.6486924                                                                                     |

### RESOURCE AVAILABILITY

#### Lead contact

Further information and requests for resources and reagents should be directed to the Lead Contact François B. Robin ([francois.robin@sorbonne-universite.fr](mailto:francois.robin@sorbonne-universite.fr)), who will address them to the appropriate author.

#### Materials availability

*C. elegans* transgenic strains generated in this study will be made available on request in exchange for reasonable compensation by requestor for processing and shipping.

#### Data and code availability

- Original code used in this study has been deposited and is publicly available on Zenodo: <https://doi.org/10.5281/zenodo.6486924>.
- Microscopy data reported in this paper will be shared by the [lead contact](#) upon request.
- Additional information required to reanalyze the data reported in this paper is available from the [lead contact](#) upon request.

### EXPERIMENTAL MODELS AND SUBJECT DETAILS

#### *C. elegans* culture and strains

A list of strains used in this study is provided in [Table S3](#).

Some strains were provided by the CGC, which is funded by NIH Office of Research Infrastructure Programs (P40 OD010440).

## METHOD DETAILS

### Endogenous *cyk-1* GFP knock-in transgenic worm generation using CRISPR/Cas9

CRISPR knock-in of *cyk-1* was carried out in Wild type *N2* genetic background using an established protocol as described in Dickinson et al.(2013). The SG sequence 5'- TCATCATCATCAGGCACAGTGG -3' positioned in the last exon of *cyk-1* was used as CRISPR targeting site. The SG sequence except PAM(TGG) was inserted in the pML2840 (Suman et al., 2019) using the overlap extension PCR method. The homologous repair plasmid was made using the GIBSON method. In brief, 1.6 kb upstream of the stop codon (left homology arm), 15-bp N-terminus linker with full-length GFP fragment and 700 bp downstream of the stop codon (right homology arm) with overlap arms were amplified and assembled in pJET1.2/blunt vector using Gibson Assembly Cloning Kit (New England Biolabs, Inc.). Full sequences are provided in Table S5. Several silent mutations were done in PAM and downstream sequence (until stop codon) in the homologous repair template to block undesired cleavage by Cas9 and avoid template switching during HDR respectively.

The cocktail of plasmids containing SG plasmid (50 ng/μl), repair template (50 ng/μl), and an co-injection marker pRF4 [*rol-6(su1006)*] (100 ng/μl) were mixed and injected into the gonads of young adult hermaphrodites (Kim et al., 2014). The rest of screening steps were followed as described earlier (Dickinson et al., 2013). Knock-in was confirmed using PCR, and DNA sequencing. The homozygous progeny were outcrossed to wild-type four times before subsequent experiments.

### RNA interference

We performed RNAi using the feeding method as previously described (Timmons and Fire, 1998). The L4417 plasmid targeting *perm-1* (obtained from the Kamath feeding library (Kamath and Ahringer, 2003)) and the entire GFP sequence (generated by the Fire lab and available at <http://www.addgene.org/1649/>) were transformed into HT115(DE3) bacteria. Bacterial cultures for feeding were grown for 10–12 h and then induced on standard nematode nutritional growth media plates containing 50 μg/ml ampicillin and 1 mM IPTG for 16–24 h at 20–25°C, then stored at 4°C. For *perm-1* RNAi, L4 stage larvae were placed on feeding plates for 16–24 h before imaging.

### Imaging conditions

We dissected gravid hermaphrodites and mounted one-cell embryos under #1.5 22-mm square coverslips in 2.5 μl of water or standard Egg Salts buffer (118 mM NaCl, 40 mM KCl, 3.4 mM CaCl<sub>2</sub>, 3.4 mM MgCl<sub>2</sub>, 5 mM HEPES, pH 7.4) containing ~500 uniformly sized polystyrene beads (15.6 ± 0.03 μm diameter, Bangs labs, #NT29N) to achieve uniform compression of the embryo surface across experiments (Robin et al., 2014).

We performed near-TIRF imaging at 19–21°C on an inverted Nikon Ti-E N-Storm microscope, equipped with motorized TIRF illuminator, Apo TIRF 100x Oil-immersion DIC N2 objective (Nikon) with 1.49-numerical aperture (NA), and PFS-S Perfect Focus unit (Nikon). Laser illumination at 488 nm and 561 nm from 300 mW solid-state sapphire laser (Coherent) was set at 30% of maximal power and delivered by fiber optics to the TIRF illuminator. Images were magnified by a 1.5x lens and collected on an Andor iXon Ultra DU-897 EMCCD camera, yielding a pixel size of 107 nm.

We controlled laser illumination angle and intensity and image acquisition using NIS Elements software (Nikon). For all experiments, we set the laser illumination angle to a standard value that was chosen empirically to approximately maximize signal intensity while maintaining even illumination across the field of view. For all SPT experiments, we collected images in streaming mode with continuous illumination at 15–60% laser intensity (100% ≈ 1.6 μW·μm<sup>-2</sup>) with 50 ms exposures to achieve frame rates of 20 frames/s.

### Tuning GFP levels to achieve single-molecule densities

The quasi-steady-state densities observed during imaging depend on the initial (unobserved) densities, photobleaching rates and the intrinsic exchange kinetics of the target molecule (see main text and below). We thus determined the appropriate initial densities empirically for a given strain and experiment. We achieved these initial densities by using two methods as previously described (Robin et al., 2014). For SWG282 (CYK-1::GFP over-expression), we used RNAi directed against the GFP sequence to deplete the pool of GFP-tagged proteins. RNAi against maternal proteins typically yields an exponential decrease in the maternal protein with time of exposure (Oegema and Hyman, 2006). We controlled the degree of depletion by synchronizing larvae and sampling embryos at different times after the initiation of feeding to identify times at which discrete diffraction-limited speckles were observed at the cell surface. The optimal time was relatively consistent across experiments for a given strain and varied from 12–36 h depending on transgene expression levels and relative abundance at the cell surface vs. cytoplasm. To fine-tune density levels, we used brief (<10 s) pulses in epi-illumination mode at high laser power until adequate density was reached (Robin et al., 2014).

### Drug perfusion experiments

For exposing embryos to 10 μM of Latrunculin A (Sigma L5163) or to 10 μg/mL of Nocodazole (Sigma M1404) in Egg Salts buffer during image acquisition, we used wider coverslips (22 mm x 30 mm) so that a perfusion chamber is formed between coverslip and slide, and the coverslip passes about 3 mm from the side of the slide. On the inverted microscope, this outer side of coverslip helps as support to able to deposit the perfusion volume as a drop (4 μL) while imaging. The drug solution likewise perfused by

capillarity between slide and coverslip exposes the embryos to the drug instantly. The perfusion timepoint is visible in the corresponding movies as a brief brightfield illumination and used as a reference during analysis.

### Assessing potential adversary effects of compression, laser exposure and GFP fusion

We followed experimental procedures as previously tested (Robin et al., 2014). Using photobleaching to reduce GFP-tagged protein levels from full to single-molecule levels in one step resulted in arrested development. However, the laser exposure required to fine-tune densities by photobleaching, or that occurring during single-molecule imaging, did not cause embryos to arrest. In all of our single-molecule imaging experiments, we verified that embryos initiated and completed cytokinesis with normal timing or, in the case of nocodazole treated embryos multiple nuclei were present in the cell. To confirm that no adverse effects on population dynamics were associated with GFP fusion in the CYK-1::GFP CRISPR strain, we also used a CYK-1::mNeon CRISPR fusion to confirm our results (data not shown, strain available upon request).

### Single-molecule detection and tracking

We used a publicly available Matlab implementation of the Crocker-Grier algorithm for single-particle detection and tracking (Pelletier et al., 2009; Crocker and Grier, 1996). In brief, the Crocker-Grier method localizes particles to subpixel resolution in individual frames by fitting local intensity peaks to a Gaussian point spread function. The two key detection parameters—peak and mean intensity of the candidate particles—are adjusted empirically for given imaging conditions using a graphical user interface. The particles are then linked frame to frame by minimizing the global displacement across all particles, given a user-chosen cutoff value for maximum particle displacement. A second parameter, the gap size, allows the possibility of ignoring 'gaps' in a trajectory due to transient failures to detect particles. These transient failures occur mainly because motion blur causes the particle intensity to fall transiently below the detection threshold.

### Computing mean squared displacement (MSD) and alpha parameter

To explore particle dynamics, and we first computed the MSD. We first selected tracks of length larger than 15 times points, or 750ms, then computed the MSD at time intervals ranging from 50 ms to the duration of the track divided by 2.5. We then performed a linear fit on the logarithm of the MSD for  $\tau < 300$  ms (or  $6 = 15/2.5$  frames, thus ensuring a "coverage" of the MSD of  $\sim 2.5$ -fold (meaning that, at maximal Tau, each measure of the MSD was sampled independently at least 2.5 times, thus minimizing measurement errors). Experimentally, after 750ms, superdiffusive particles had traveled on the order of  $\sim 900$  nm, or  $\sim 9$  pixels, compared with a localization resolution  $\sim 60$  nm under our imaging conditions.

### Estimating *in vivo* actin assembly parameters

To estimate actin concentration, we assumed that elongation rates scale linearly with actin concentration, and used previously measured peak elongation rates of  $\sim 60$  monomers  $\cdot$  s $^{-1}$ , at 1.5  $\mu$ M ATP-Actin in presence of 4  $\mu$ M profilin (Neidt et al., 2009; Neidt et al., 2008).

To infer filament length, we made the following assumptions:

1. actin monomers display simple mono-exponential half-life at the cortex,
2. actin monomers display a half-life measured by tracking and smPRESS of 0.08-0.15 s (Robin et al., 2014; Michaux et al., 2018),
3. elongating formins display simple mono-exponential half-life at the filament barbed end,
4. elongating formins display a half-life measured by smPRESS of  $\sim 0.11$  s (Figure 2D).

Under these assumptions, we consider solely actin filaments assembled by formins. From the perspective of an actin monomer at the time of disassembly, two options are possible:

- (1) the monomer disassembles while the formin is still elongating,
- (2) the formin unbinds and elongation stops before the monomer disassembles.

The "effective" elongation time of the formin on the filament is then the minimum value between (1) and (2). If actin lifetime and formin mediated actin-filament elongation time have independent exponential distributions of parameters  $1/\tau_{actin}$  and  $1/\tau_{formin}$ , then the minimum between the two values also has exponential distribution of parameter  $1/\tau_{filament} = 1/\tau_{actin} + 1/\tau_{formin}$ . Under these conditions, the length of the elongated filament is:

$$L_{filament} = V_{elongation} \times \tau_{filament} = \frac{V_{elongation}}{\left(\frac{1}{\tau_{actin}} + \frac{1}{\tau_{formin}}\right)}$$

### Formin speed measurement analysis

We performed single-molecule imaging as described previously. We mounted the embryos between glass slides with squares wells of 20  $\mu$ m thick Epoxy and #1.5 coverslips (170  $\mu$ m thick) in 2.5  $\mu$ L of 0.22  $\mu$ m filtered water with 15.4  $\mu$ m polystyrene beads. We

imaged single molecules using 50% of 90mW of 488 nm laser, 50 ms of exposure, no delay between frames, using Photometrics 95B prime 22 mm sCMOS camera. Laser angle was set to 65°. Room temperature maintained between 19 and 20.5°C. After acquisition, we averaged two consecutive frames, in order to achieve 10 frames per second using ImageJ software (NIH Image, Bethesda, MD). We used Matlab implementation of the Crocker–Grier algorithm (Crocker and Grier, 1996) by the Kilfoil lab for single-particle tracking. We selected manually a ROI to exclude tracks from residual particles outside the cell for each stage: whole embryo for one-cell stage, anterior (AB) cell for two-cell stage, posterior AB daughter cell (ABp) for four-cell stage. Each stage was separated into three phases based on observed cortical dynamics: interphase (pulsed contractions at the cortex); mitosis (cortex “stable” with no identifiable pulsed contractions); and cytokinesis (visualized by cleavage furrow assembly).

Subsequent image analysis was performed in Matlab. We selected the trajectories based on their anomalous diffusion coefficient  $D$  and scaling exponents  $\alpha$ . Tracks were classified as subdiffusive and superdiffusive, and selected specifically superdiffusive trajectories. In order to calculate the velocity only during elongation of actin filaments, we performed a second selection to exclude tracks displaying multiple behaviors during their lifetime (due to switches between subdiffusive and superdiffusive) and retained tracks displaying exclusively superdiffusive behavior. Finally, we screened individual trajectories manually to retain tracks that were closer to a line to avoid skewing our estimates of particle speed.

### Two-color imaging microscopy

We performed single-molecule imaging as described previously. Acquisitions were performed with the Andor iXon 897 EMCCD camera. We imaged at 30% of 90 mW for 488 nm and 561 nm, with 50 ms exposure and no delay between frames (100 ms between two successive frames of the same channel). After acquisition, we averaged five consecutive frames, in order to achieve 2 frames per second using ImageJ. Pulsed contractions were selected manually and data from the intensity profile of a line drawn through the pulse is collected in a single frame. 3 pulses per embryo in 6 embryos (total of 18) were analyzed in Matlab (R2018a version). Intensities are smoothed and normalized with the local maximum value set to 1 and the immediately preceding minimum set to 0. To compare local accumulations of GFP fusions with Myosin (Figures 3A–3E), we defined the peak Myosin intensity as the point of maximal intensity in the red channel (Myosin, NMY-2::mKate2) in a cross-section through the pulse, and aligned spatially our collection of pulses based on the red channel. The information on the spatial alignment was subsequently propagated to the intensity data of the green channel (Formin, RhoA, and ROCK) to compare how the intensity in the two channels correlate spatially in our pulse collection. Intensity valued was smoothed through a rectangular window (size 3).

### Tracking of individual pulses of CYK-1::GFP

We used a semi-automatic approach to identify and follow CYK-1 pulses during the two-cell stage interphase, in the anterior blastomere. We manually identified isolated pulses and drew a ROI over the surface of each pulse (about 6  $\mu\text{m}$  in diameter), at about 5 frames before maximum contraction of the area can be detected. The ROI was then automatically propagated in time before and after  $t_0$ , and also we designed a Matlab script (STAR Methods) allowing to adapt automatically the surface of the ROI in order to include the full trajectory of particles appearing within the ROI. To eliminate drift of the ROI associated with cortical flows, independently of CYK-1 mobility within the pulse area, we used a dedrifting routine on each particle based on the displacement of its neighbors. This was important for mobility analysis as particles registered with a global drift—and therefore displaying a persistent directional motion—would otherwise register as superdiffusive.

### Single particles tracking and pulse analysis pipeline in Matlab

We designed an analysis pipeline based on Matlab scripts (STAR Methods, code available upon request) that includes CYK-1::GFP particles detection and tracking, reduction to the surface of the embryo and the AB cell, de-drifting of the trajectories and MSD analysis for segregation in different mobility populations (mainly superdiffusive CYK-1 vs. subdiffusive CYK-1). The further step is to intersect the matrix of all these trajectories with the specific ROI of each pulse. The final step is to normalize and align all the pulses (number of particles in time) with respect to their maximum and the minimum number of particles before, then to measure the angle orientation of every vector formed by the trajectories with respect to the center of the ROI.

### Numerical simulation of formin local recruitment

We used MATLAB to compute a 2D simulation of local formin activation and actin filament elongation. Pulses were spatially and temporally distributed in an embryo's shaped mask in a random manner. Pulse were defined by a fixed 5x5  $\mu\text{m}$  window (100x100 pixels) and a 20 s time window (400 frames). Pulses could not overlap in time and space. Using experimental data, density of formin recruitment, position around the center of the formin accumulating region and kinetics of recruitment could be computed in each pulse. We added 0.01 formins recruitment  $/\mu\text{m}^2/\text{frame}$  all over the embryo mask (independent of pulses generation) corresponding to the formin recruitment rate observed in areas away from a pulse. According to experimental data, 80% of the formin recruited were assigned to be subdiffusive while 20% of them were assigned superdiffusive. Since we aimed to study superdiffusive particles, we approximate sub-diffusive and diffusive particles as a unique population of immobile particles. Each position of superdiffusive tracks were computed using the following sequence. The length of the step  $R_n$  was picked in a normal distribution whose mean is 1.23  $\mu\text{m}/\text{s}$  and standard deviation is 0.30  $\mu\text{m}/\text{s}$  (values extracted from experimental data). The orientation  $\theta_n$  of the step was calculated assuming a persistent length  $P_L$  of 15 $\mu\text{m}$  (close to the actin persistence length, (Howard, 2001)).



$$\theta_{n+1} = \theta_n + X \times \cos^{-1} \left( e^{-\frac{\beta}{2 \cdot \beta_L}} \right) \text{ with } X \rightarrow \mathcal{N}(0, 1)$$

Length of track were assigned using the distribution of track length for sub-diffusive and super-diffusive particles, respectively. Simulated data were analyzed using the same methods as experimental data.

### Overview of the computational model of actomyosin networks mechanics

For simulations of actomyosin networks in this study, we used a well-established agent-based model of actomyosin networks based on the Langevin equation (J. Li et al., 2017; Jung et al., 2015; T. Kim et al., 2009; Mak et al., 2016). The detailed descriptions about the model and all parameters used in the model are explained in Supplementary Text and Table S1. In the model, actin filament (F-actin), motor, and ACP are coarse-grained using cylindrical segments (Figure S7A). The x, y and z positions of all the cylindrical segments are updated by the Langevin equation for Brownian dynamics. Deterministic forces in the Langevin equation include bending and extensional forces that maintain equilibrium angles formed by segments and the equilibrium lengths of segments, respectively, as well as a repulsive force acting between neighboring pairs of segments for considering volume-exclusion effects between F-actins. Due to the repulsive force, F-actins push away from each other if they overlap in space.

The formation of F-actin is initiated by a nucleation event, followed by polymerization at the barbed end and depolymerization at the pointed end. ACPs bind to F-actin without preference for cross-linking angles at a constant rate and also unbind from F-actin at a force-dependent rate determined by Bell's law (G. I. Bell, 1978). Each arm of motors binds to F-actin at a constant rate, and it then walks toward the barbed end of F-actin or unbinds from F-actin at force-dependent rates determined by the parallel cluster model (Erdmann et al., 2013; Erdmann and Schwarz, 2012). For all simulations in this study, we used a thin computational domain (20  $\mu\text{m}$   $\times$  20  $\mu\text{m}$   $\times$  0.1  $\mu\text{m}$ ) with periodic boundary conditions only in x and y directions (Figure S7B). In z direction, the boundaries of the domain exert repulsive forces on elements that moved beyond the boundaries. At the beginning of each simulation, a thin actin network is formed via self-assembly of F-actin and ACP.

For implementing RhoA activation, the domain is divided into 16 subdomains (4  $\times$  4 in x and y directions). Every 30 s, one of the subdomains is randomly selected and then activated. In the activated subdomain, a fraction of the barbed ends of F-actins are randomly chosen and then undergo faster polymerization by a factor,  $\rho_f$ , for the duration of  $\tau_f$ . With the reference values of  $\rho_f = 10$  and  $\tau_f = 10$  s, F-actins are elongated by  $\sim 10$   $\mu\text{m}$  on average. For each simulation condition, five simulation runs are performed. After the time delay of  $d_M$ , motors in the activated subdomain are allowed to self-assemble into thick filament structures for the duration of  $\tau_M$ . The reference values of  $d_M$  and  $\tau_M$  are 5 s and 15 s, respectively. These active motors in the form of thick filaments can contract the part of the network in the activated subdomain. Once they become inactive after  $\tau_M$ , the motors are disassembled into monomers that cannot bind to F-actin.

The code used in this study has been deposited at Zenodo and is publicly available with <https://doi.org/10.5281/zenodo.6486924>.

### QUANTIFICATION AND STATISTICAL ANALYSIS

Quantification and statistical analysis are provided in the corresponding figure legends, Tables S1 and S2. Additional information is provided below for Figure 2.

**Formin speed measurement statistical analysis (Figure 2):** 23 to 40 tracks per embryo were selected. Normal distributions were verified. Two-sample Student tests (t-tests) were performed to measure the significance of the difference in speed between each stage and phase. \*\*\* means  $p < 0.001$ , \*\* means  $p < 0.01$ , ns: non-significant.

**Cell Reports, Volume 39**

**Supplemental information**

**Rapid assembly of a polar network architecture  
drives efficient actomyosin contractility**

**Vlad Costache, Serena Prigent Garcia, Camille N. Plancke, Jing Li, Simon Begnaud, Shashi Kumar Suman, Anne-Cécile Reymann, Taeyoon Kim, and François B. Robin**

Figure S1

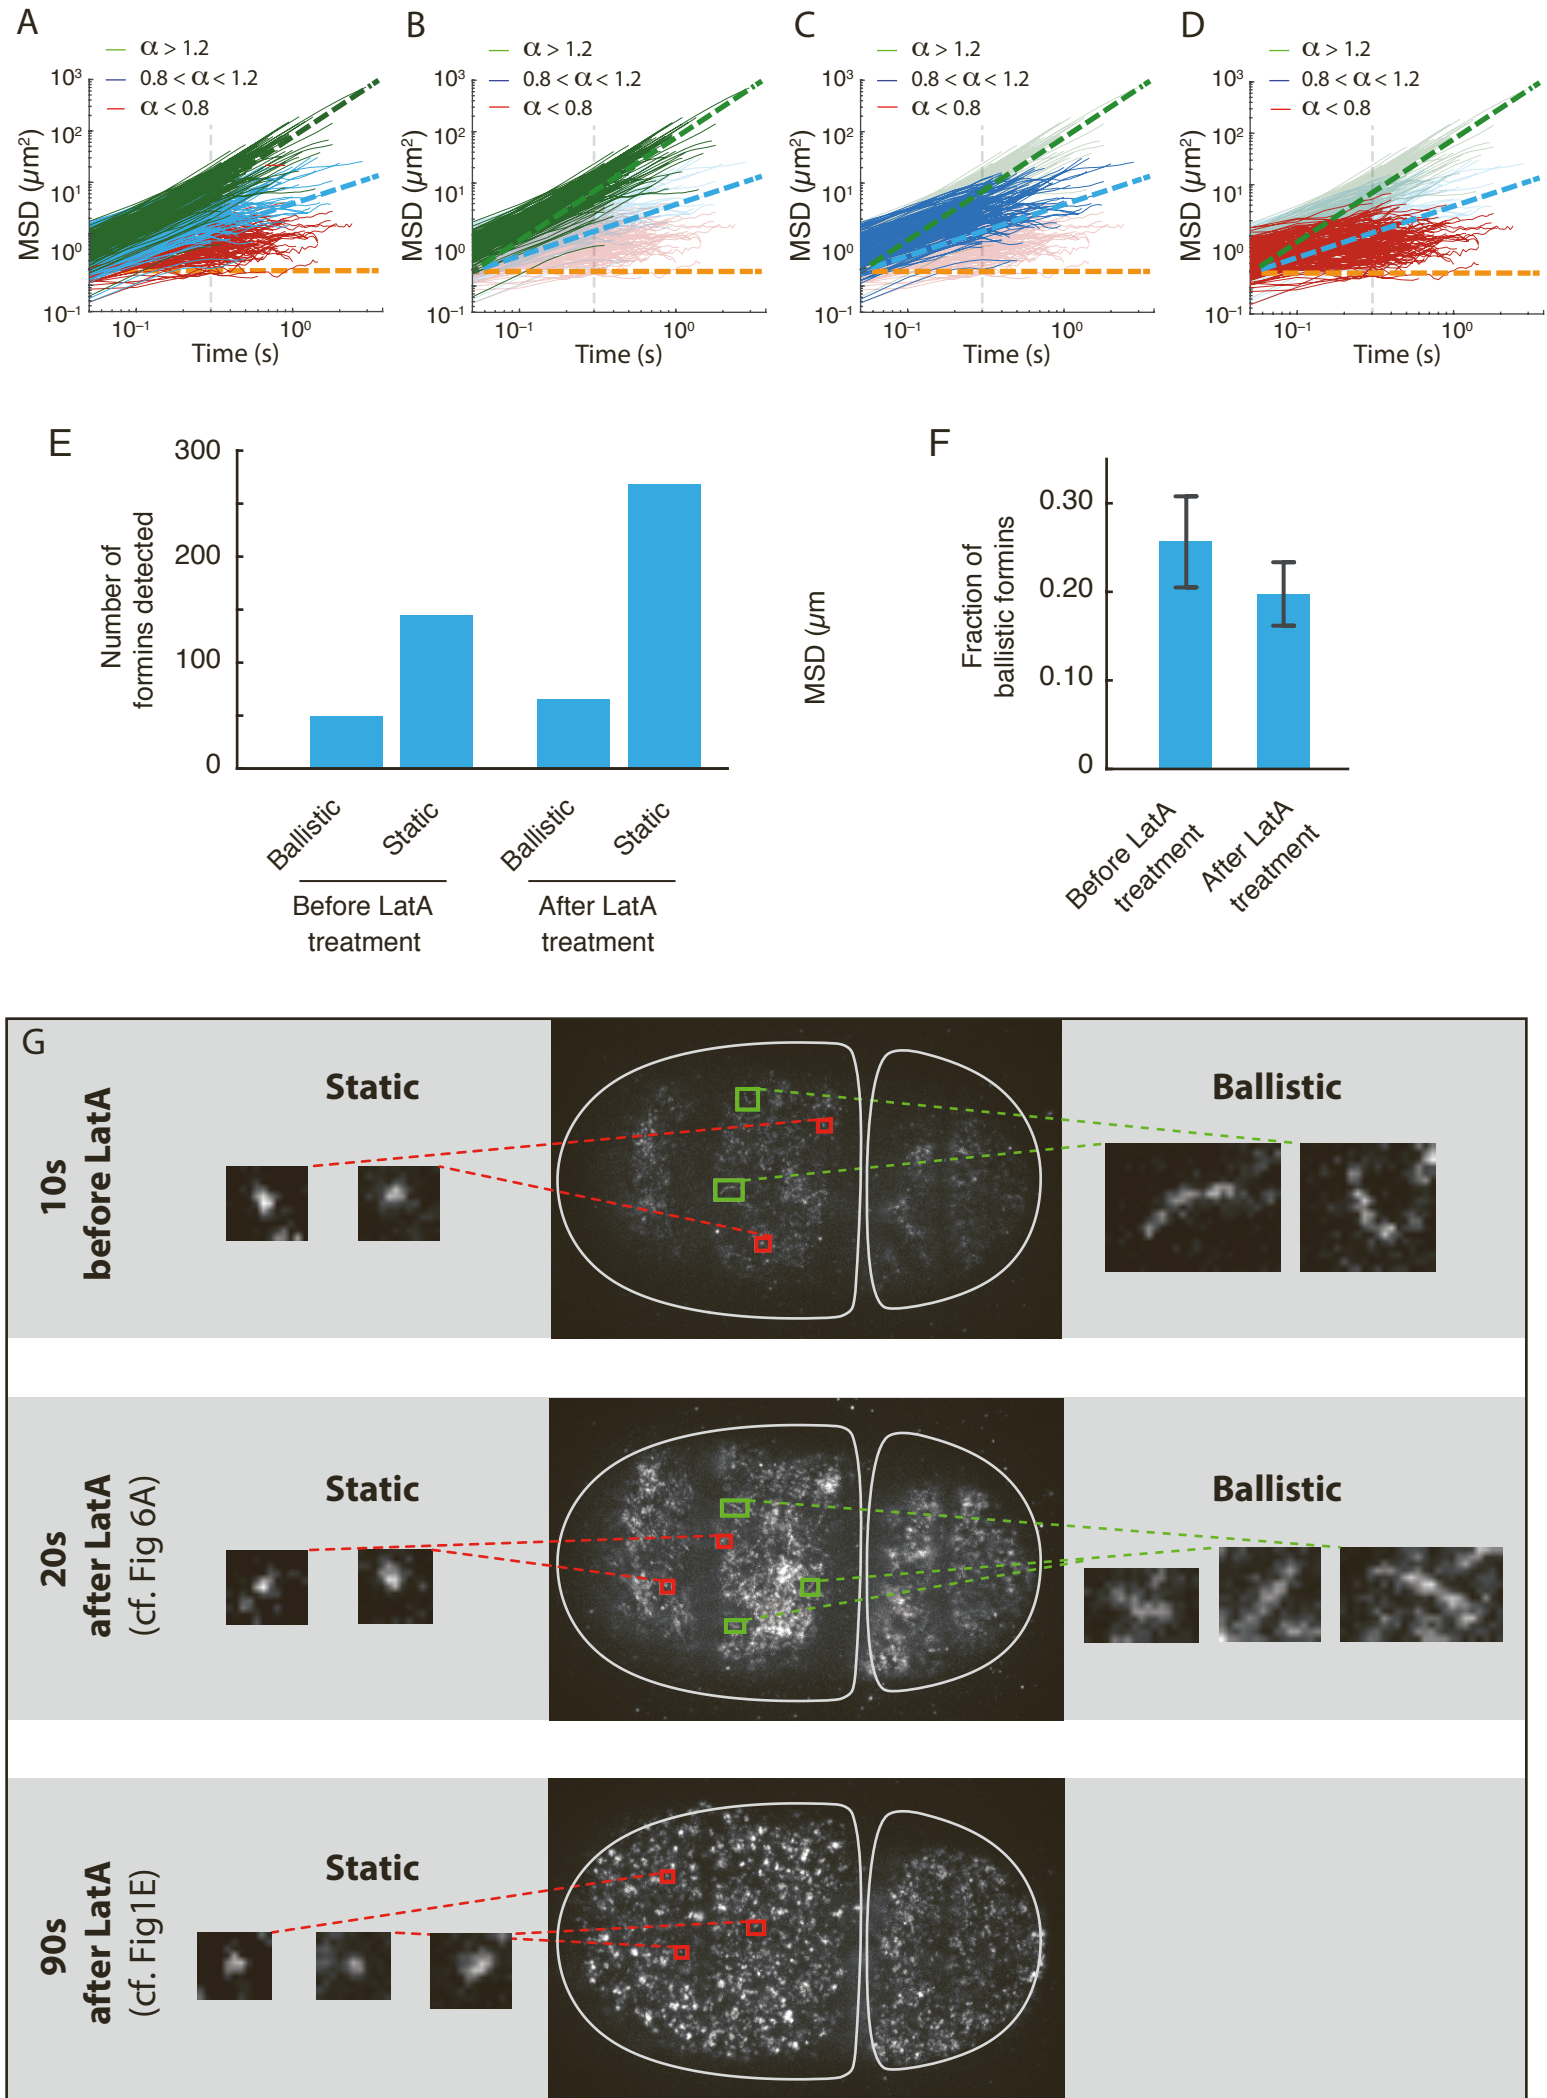

**Figure S1. Early Effect of LatrunculinA on CYK-1 Formins at the Cell Cortex. Related to Figure 1.** (A) Number of superdiffusive and subdiffusive formins before and after treatment. (B) Fraction of superdiffusive formins before and after treatment. 3 different 2-c stage embryos permeabilized with Perm-1 RNAi, and treated with LatrunculinA 10 $\mu$ m, were analysed for the quantity and the mobility of the formins at 20s post drug perfusion, and compared to the 10 s before status of the respective embryo. Results are pooled among embryos. (C) Still images with Running Projections of 10 frames made out of averaged movies (3 frames AVG) so that elongating formins appear as lines (see inlets on the left hand) and immobile formins as dots (see inlets on the right hand). The horizontal regions indicate the timing with respect to the treatment with LatrunculinA. Notice that during early time (20s after treatment) elongating formins are still present and well visible. However, after 90s (the time of the analysis of different populations from Figure 1E) there are no more elongating formins visible at the cortex. (D-G) Mean-square displacement against lag time (MSD), detailing individual mobility populations of CYK-1 from Figure 1C (same data set). Slope curve reports on the anomalous diffusion exponent. Particles with anomalous diffusion exponent larger than 1.2 in green, between 0.8 and 1.2 in blue, and smaller than 0.8 in red. Pure superdiffusive corresponds to  $\alpha = 2$  (green dashed), pure diffusive  $\alpha = 1$  (blue dashed), and immobile (orange dashed). Detected mobilities correspond to different classes of behaviors. Superdiffusive display a characteristic ballistic motion (green, top panel), while subdiffusive particles appear immobile in the cortex (red, bottom). (D) All 3 populations superposed like in Figure 1C. (E, F, G) Display of trajectories from the individual populations.



Figure S2

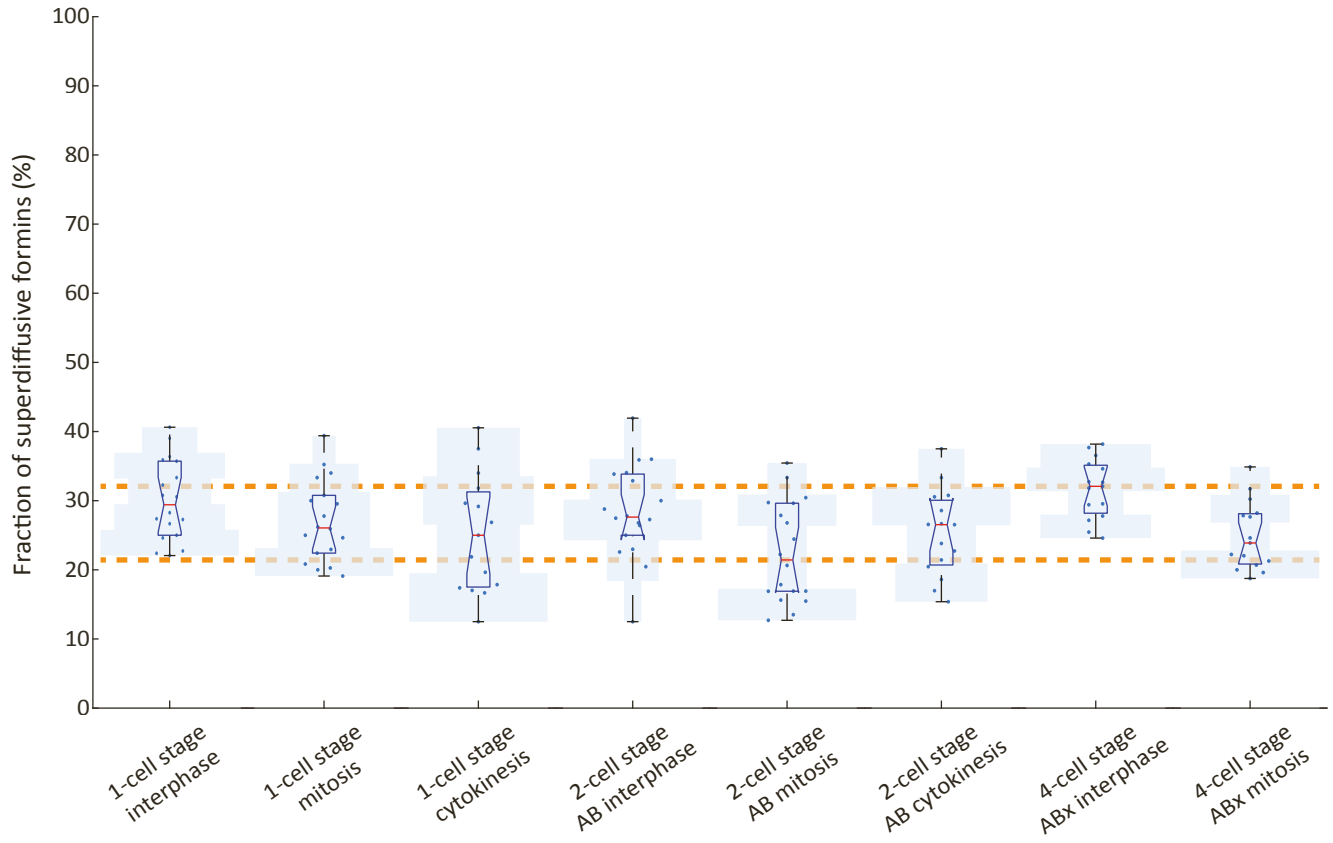

**Figure S2. Ratio of superdiffusives formins in total population depending on cell cycle phase and the developmental stage. Related to Figure 2.** 5 to 6 individual embryos carrying CYK-1::GFP overexpression per condition. 3 individual, same size ROI of at 3 distinct timepoints per embryo, using 1 s running projection to manually identify superdiffusive formins.

Figure S3

A

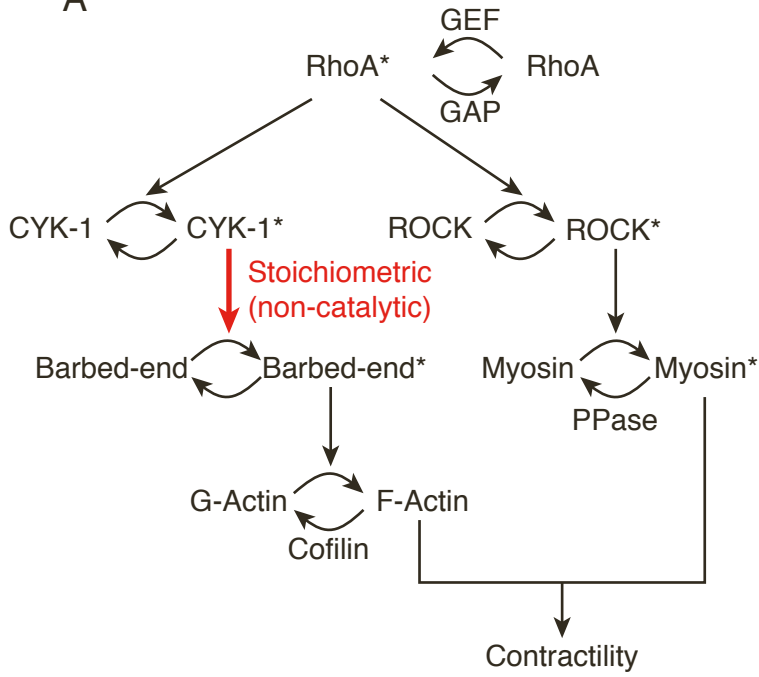

B

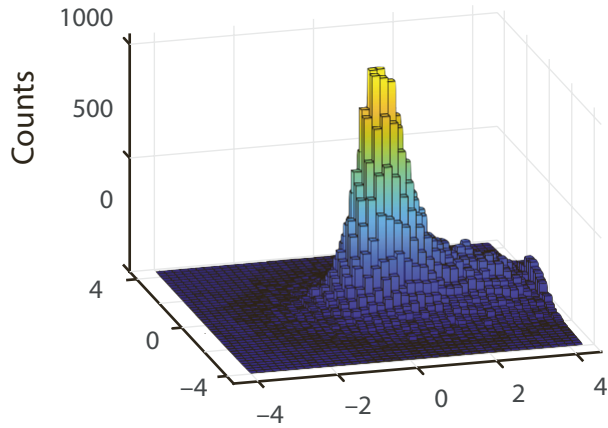

F

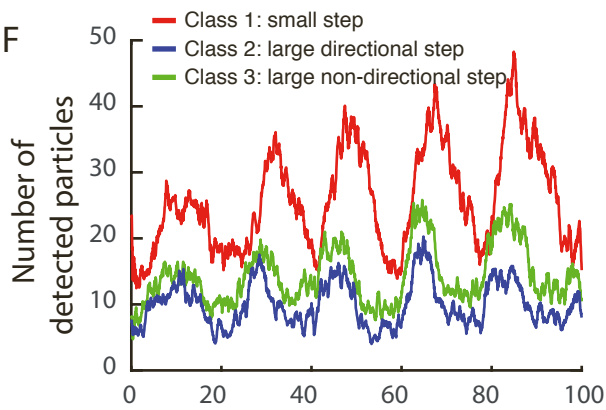

G

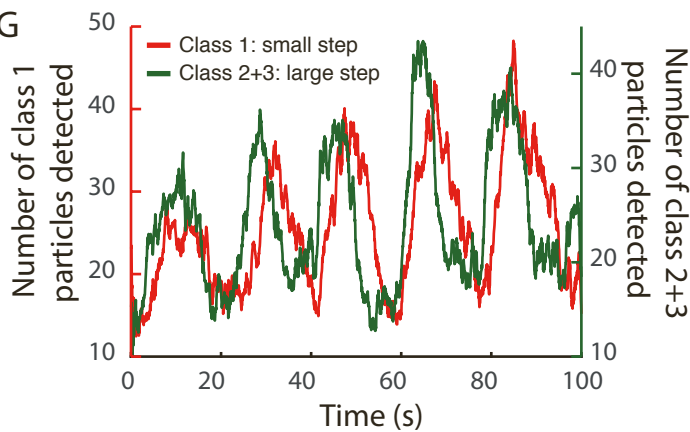

C

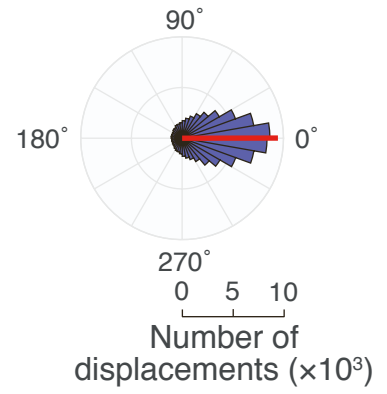

D

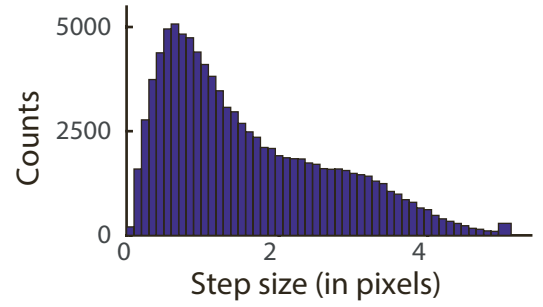

E

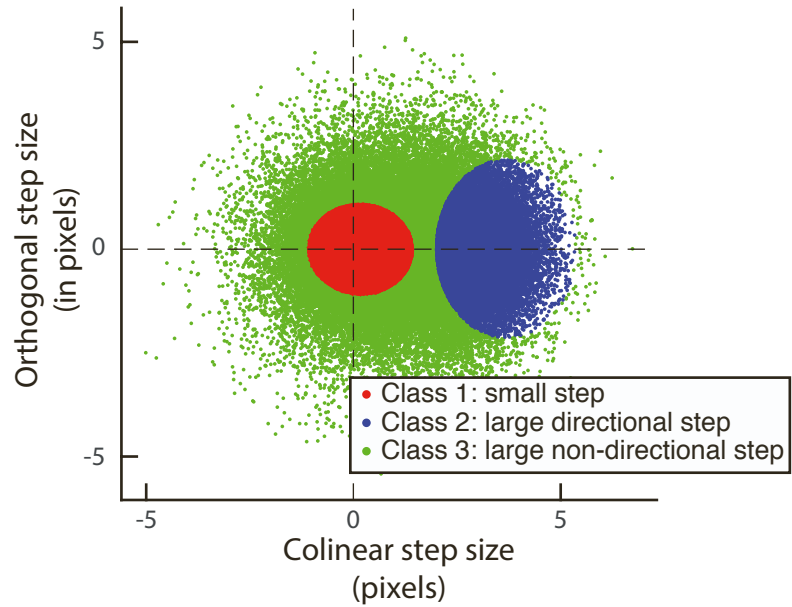

H

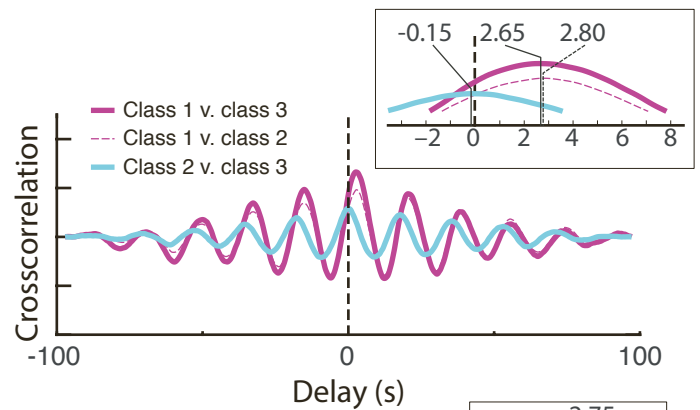

I

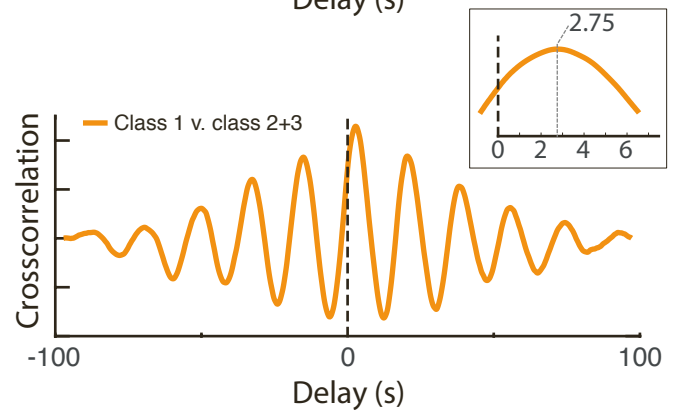

**Figure S3. Comparative localizations of ROCK/LET-502, RhoA biosensor and Formin/CYK-1. Related to Figure 3.** (A) Mean of spatial normalized intensity of RhoA biosensor (solid green, AHPH::GFP) and Myosin II (solid red, NMY-2::mKate2 at endogenous locus) density profile across pulses. Shades: std from 50 pulses from 10 embryos. (B) Mean of spatial normalized intensity of ROCK (solid green, GFP::LET-502 at endogenous locus) and Myosin II (solid red, NMY-2::mKate2 at endogenous locus) density profile across pulses. Shades: std from 50 pulses from 10 embryos. (C) Merged results from (A, B). (D) Kymograph of Actin::GFP at single-molecule levels with NMY-2::mKate illustrating the contraction of the network during pulsed contractions. Region of interested is displayed dynamically in Movie S5. (E, G, I) Kymograph showing RhoA (GFP::AHPH (E)) or ROCK (GFP::LET-502 (G)) or Formin (CYK-1::GFP (I)) and Myosin (NMY-2::mKate2) pulsed contractions at the cortex of 2-cell stage *C. elegans* embryo during interphase. (F, H, J) Time-lapse of an individual pulsed contraction of NMY-2::mKate2 in the red channel (magenta) and RhoA (GFP::AHPH, panel F-F’), ROCK (GFP::LET-502, panel H-H’) or Formin (CYK-1::GFP, panel J-J’) in the green channel and at the cortex of 2-cell stage *C. elegans* embryo during interphase. Below time-lapses: examples of representative individual pulses and the corresponding intensity profile, grey solid vertical line: center used for alignment in Fig. 3A-E and Fig. S4A-C. Black square: time frame picked to measure the intensity profile. White dashed line: instance of line used for the measurements presented in Fig. 3A-E and Fig. S4A-C.



Figure S4

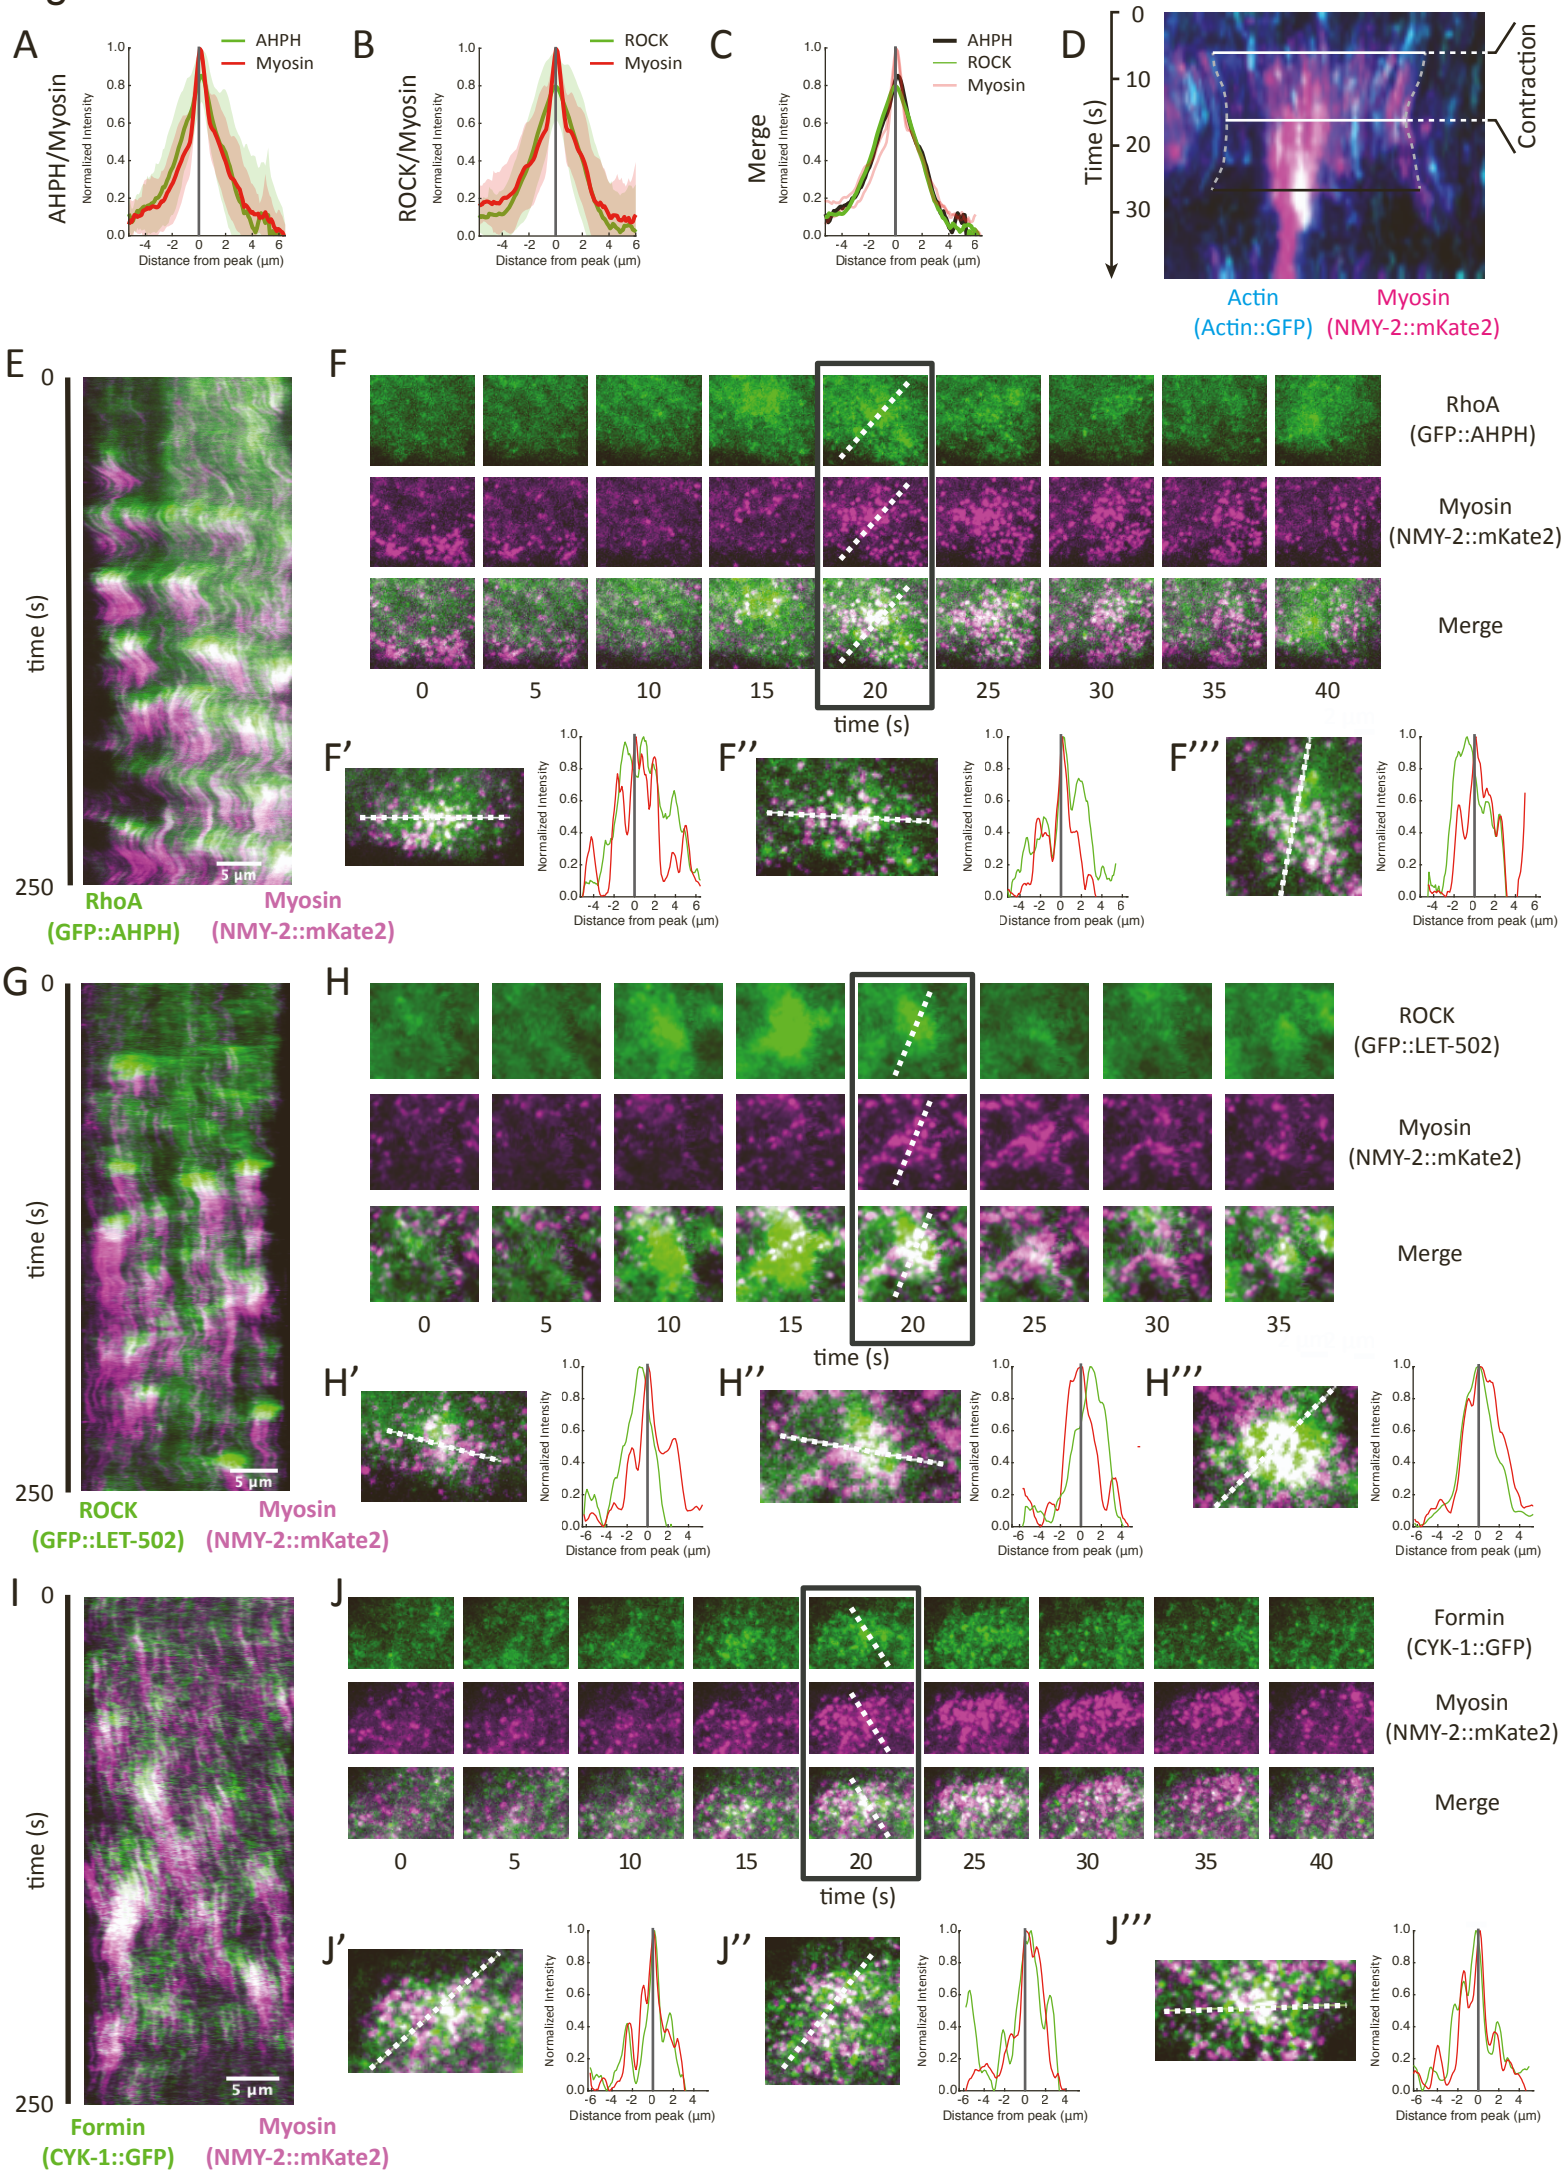

**Figure S4. Sorting and timing distinct populations of the formin CYK-1 reveals the kinetic signature of formin accumulation during pulsed contractions. Related to Figure 3. (A)** Activation cascade of the formin CYK-1 by RhoA. **(B)** 3D histogram of step displacement with respect to the orientation of the previous step of the particle trajectory. Steps are taken of over 7 frames (350 ms). The histogram shows a large peak in zero, and a second additional peak around 3.5 pixels forward. **(C)** Distribution of angles of the steps in (B). **(D)** Distribution of step size, showing a merged but discernibly bimodal distribution of step sizes. **(E)** Automated classification of steps in (B) in 3 classes by 2-d gaussian fitting. Red: small/subdiffusive steps. Blue: large steps in the same direction as the previous step, corresponding to the second peak discussed in (B). Green: non-directional step, corresponding to formins changing course, or initiating elongation. **(F)** Temporal dynamics of the various step classes during a pulse, akin to Fig. 3A-C, but based on individual steps instead of whole trajectories. Green, red and blue as in (E). Note that Green and Blue curves, representing two classes of large steps (directional and non-directional) present similar temporal dynamics. **(G)** Temporal dynamics of subdiffusive steps vs “large steps”/superdiffusive steps. Dark green: merger of both classes of large steps (green and blue above). Red: small/subdiffusive steps. **(H, I)** Cross-correlation between the different populations of steps, and measured lags between these populations. Subdiffusive formins arrive  $\sim 2.7$  s after superdiffusive (large steps) formins. Insets show an enlarged view of the peak region.

Figure S5

A **Biochemical scheme used:**

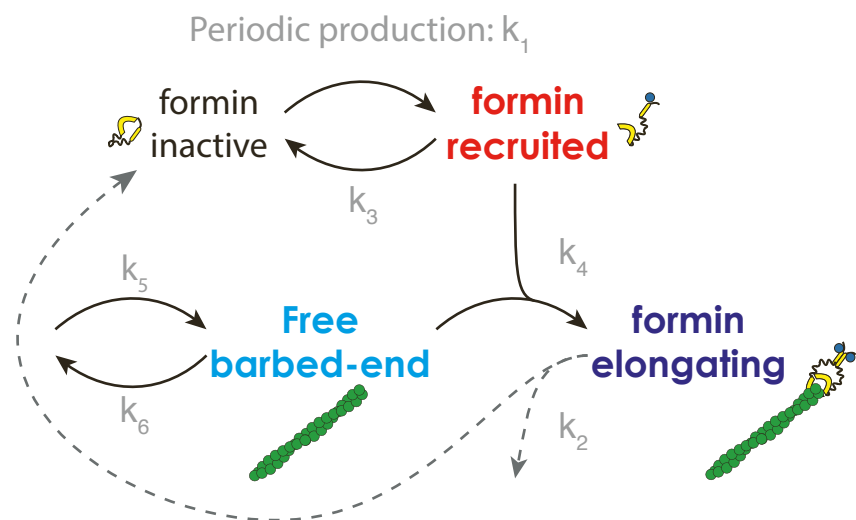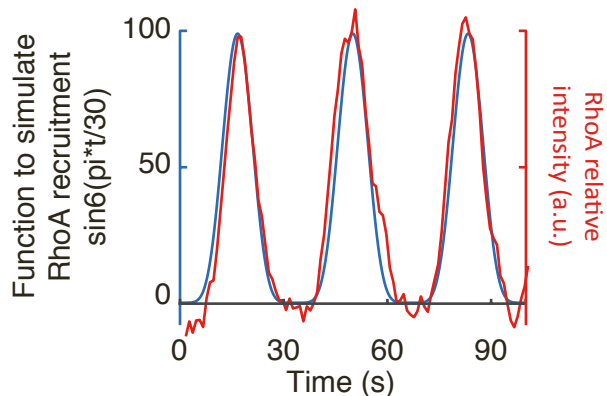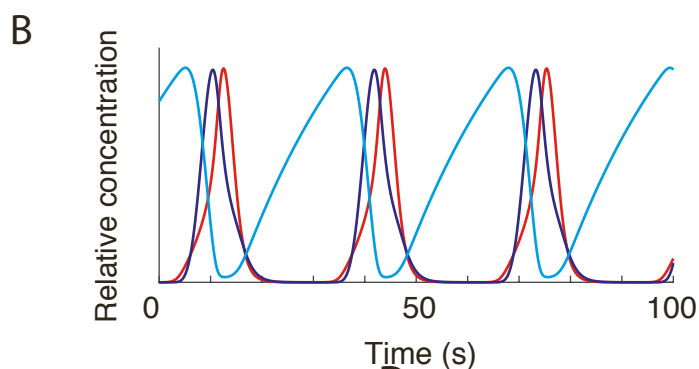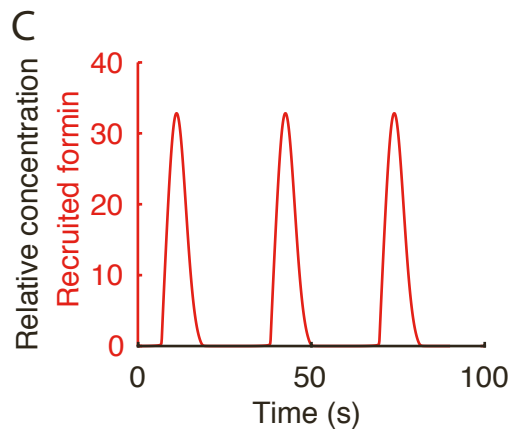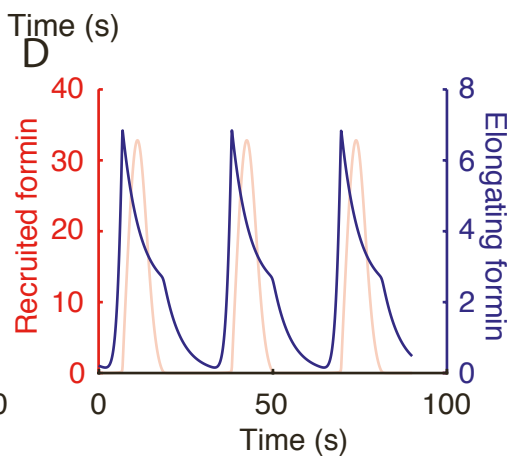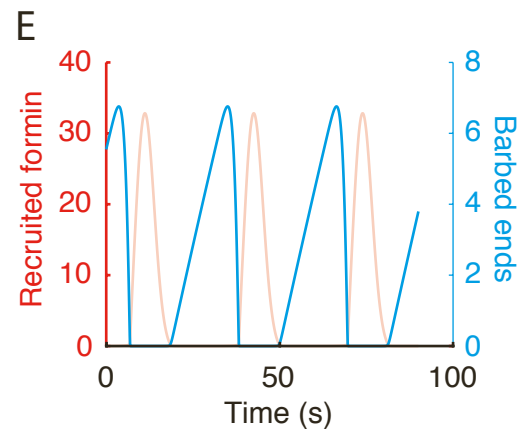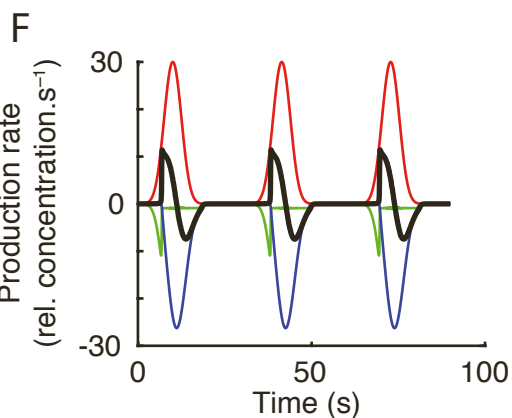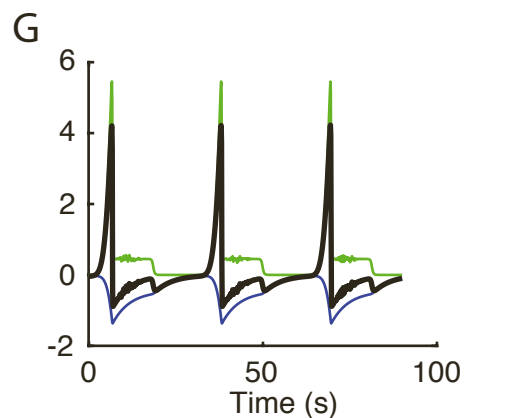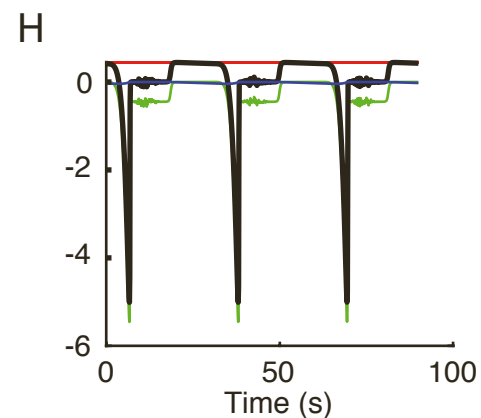

**Recruited formin production:**  
 recruited by RhoA  
 converted to elongating formin  
 converted back to inactive formin

**Elongating formin production:**  
 converted from recruited formin  
 converted back to inactive formin

**Barbed-ends production:**  
 basal barbed-ends production  
 used by elongating formin  
 used by capping

**Figure S5. Mathematical simulation of a barbed end depletion model – a detailed view. Related to Figure 4. (A)** Biochemical scheme for formin recruitment, activation and formation of a complex with barbed ends. Right panel compares function to simulate the temporal dynamics of RhoA recruitment with corresponding experimental observation. We measured the intensity of RhoA during a series of 3 consecutive pulsed contraction (red curve), and compared the dynamics with the waveform used to simulate pulsed contractions  $\sin^6(\pi t/30)$ . Numerical simulations results proved robust to the specific waveform used with respect to the main conclusions. **(B)** An example of the evolution formin populations during a series of 3 pulses on the same graph. Cyan: Barbed ends, red: Recruited formins, purple: elongating formins. **(C-E)** Same as Fig. 4A-C, provided for reference for (F-H). **(C)** Temporal dynamics of recruited formins during a sequence of 3 pulses. Red: Recruited formins. **(D)** Same, with elongating formins (purple: elongating formins, light red: recruited formins). Recruited formins accumulate after elongating formins. **(E)** Temporal dynamics of barbed ends (Cyan: barbed ends, light red: recruited formins). **(F)** Sources and sinks affecting formin concentration are represented with a color code. Total derivative is presented in black, the positive contribution (production) and negative contribution (conversion) as described in the figure. **(G, H)** Same as (F) for the concentration of elongating formins (G) and barbed ends (H).



Figure S6

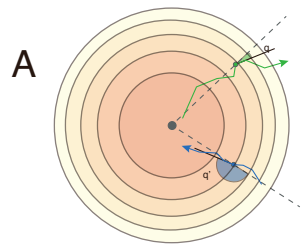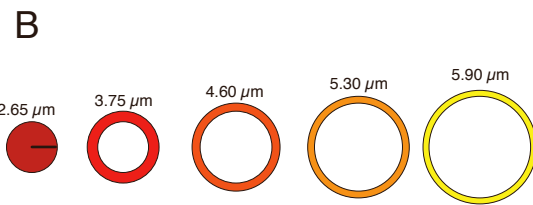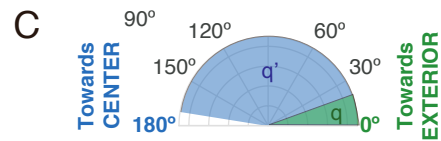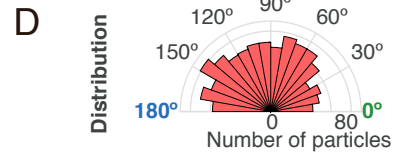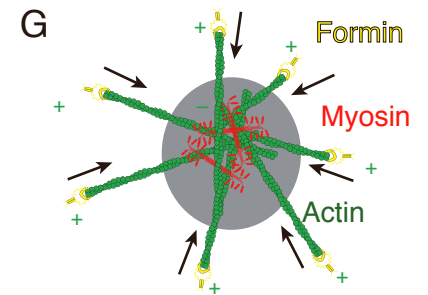

**E**

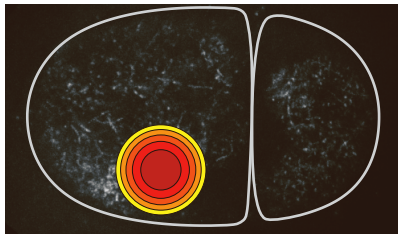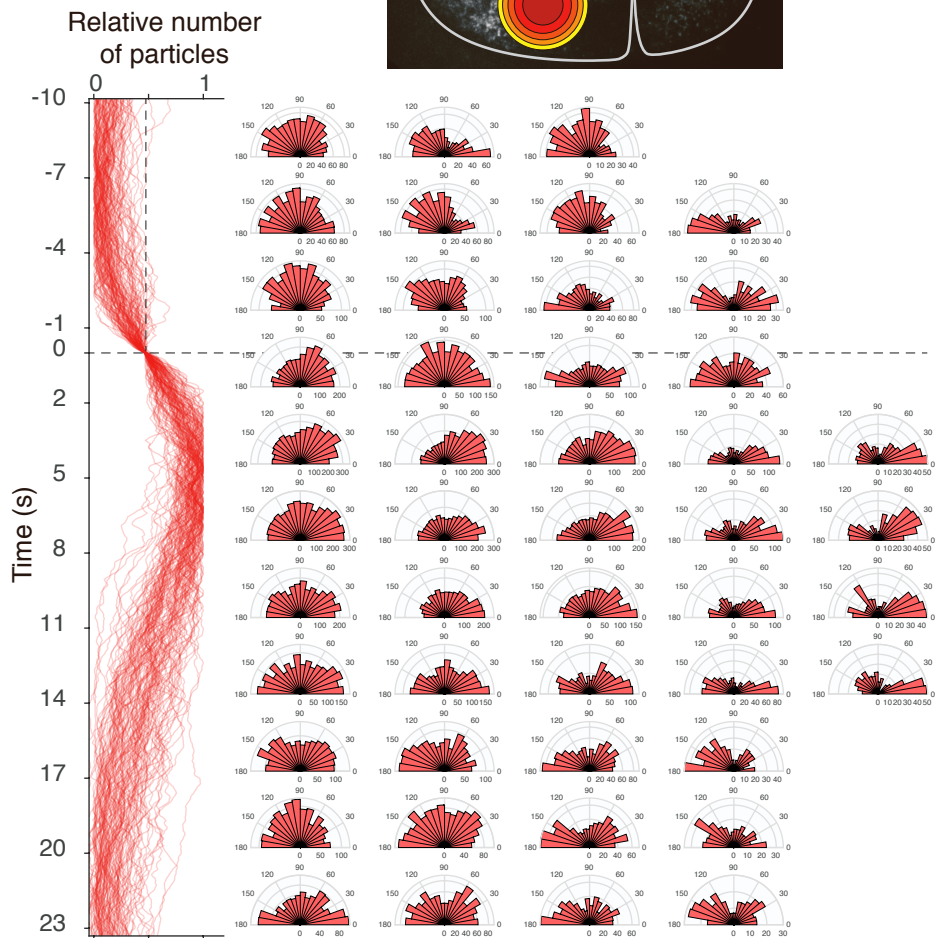

Real formin trajectories  
n = 10 embryos, 115 pulses

**F**

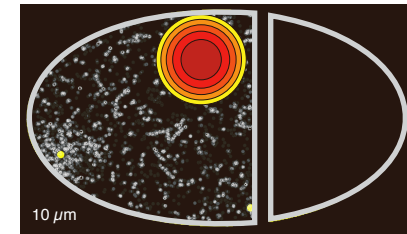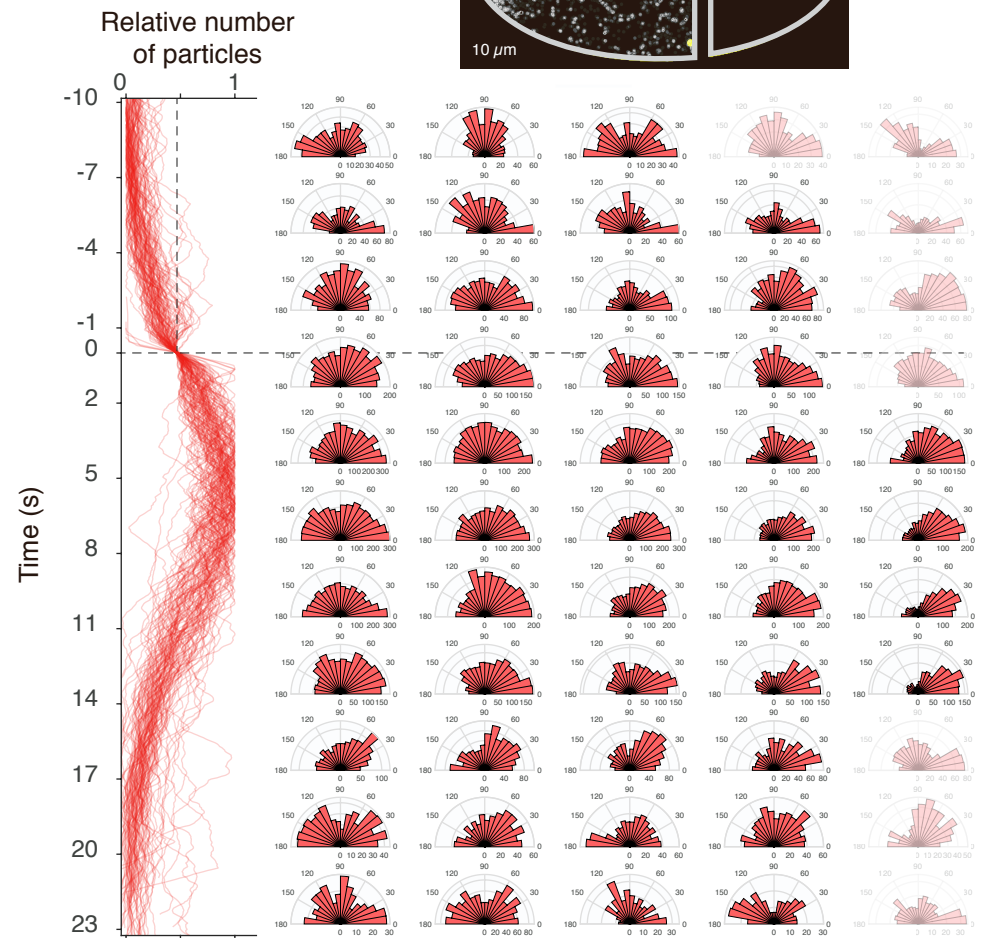

Simulated formin trajectories  
n = 105 pulses

**Figure S6. Simulated CYK-1 formin trajectories display similar polar orientation (barbed ends pointing out) during pulsed contractions, as measured in real embryos. Related to Figure 5. (A)** Cartoon of a considered region of pulsed accumulation of formins, two examples of trajectories are drawn with the measured angle of the tangent from the center of the region to the vector of each particle in every position: green formin is directed outwards meanwhile blue formin is directed towards the center of the formin pulse. **(B)** The pulsed contraction region is separated in concentric circular regions that have the same surface. The radius of each circular region is indicated. **(C)** Measure of the angle for two formin trajectories is performed with respect to the center of the formin pulse and the local orientation of the formin trajectory. The green track ( $\theta \sim 25^\circ$ ) is oriented with the barbed end of the filament pointing away from the center of the formin pulse, while the blue track ( $\theta \sim 170^\circ$ ) is oriented towards the center of the formin pulse. **(D)** All the measured angles of trajectories within a circular region from the pulsed contraction are displayed as distributions on  $180^\circ$  polar plots. **(E)** Measured angles of formins trajectories in pulsed contractions from real embryos, with respect to a spatial coordinate (horizontal) and a time coordinate (vertical) of the pulsed accumulation. The vertical red curves display the accumulation of formin particles for each pulse. All pulses are aligned at 45% ratio between minimum and maximum, at time 0, and we signal this time with a horizontal dashed line. Dataset is the same as Fig. 5. The regions around the pulse, and when pulse intensity is high (dashed black box), display a distribution skewed towards 0, showing that the orientation of the formins point outwards of the pulse region. **(F)** Similar analysis as in (E), with simulated formin tracks based on formin kinetics extracted from measurements in real embryos (see Methods section for details). **(G)** Mechanistic model of actin filament orientation during pulsed contractions. Experiments performed on strain over-expressing CYK-1 fused with GFP, and GFP density was reduced using RNAi against GFP, through feeding – see methods.

Figure S7

A

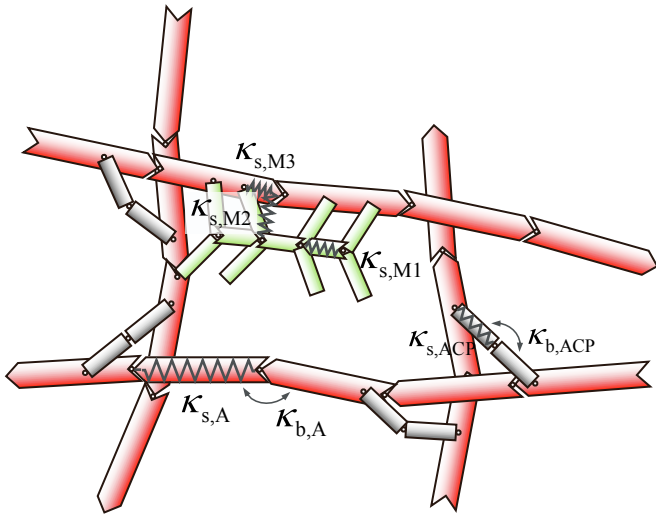

B

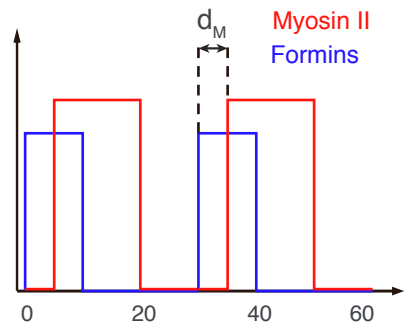

C

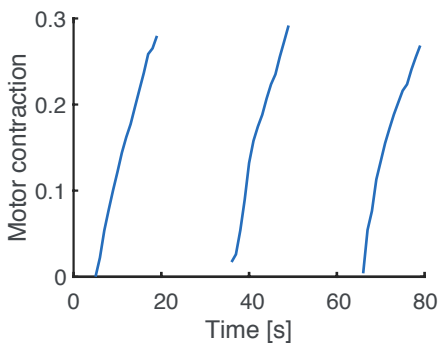

D

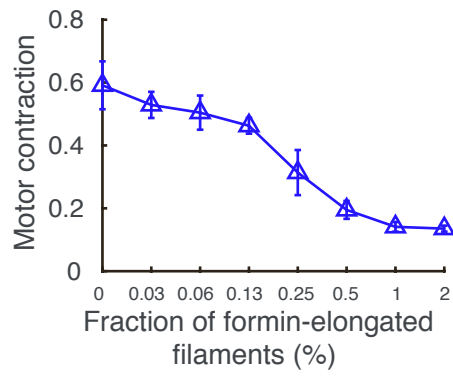

E

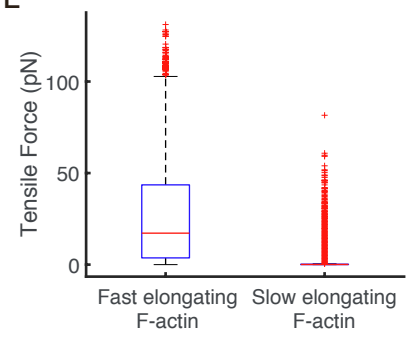

**Figure S7. Numerical simulation of the mechanics of actomyosin networks during pulsed contractions. Related to Figure 6. (A)** Agent-based model for simulating actomyosin networks. Actin (red), actin cross-linking protein (ACP), and motor (green) are simplified by cylindrical segments. Spring and bending forces with stiffness ( $\kappa$ 's) maintain equilibrium lengths and angles, respectively. **(B)** Activation scheme of myosin and formins during pulsed contractions. **(C)** An example showing the extent of myosin contraction measured in three different activated regions. **(D)** Boxplot showing the distribution of tensile forces acting on fast elongating actin filaments (left) and slow elongating filaments (right) in the control condition. **(E)** The average of the maximum values of the motor contraction shown in (C) as a function of the fraction of quickly elongating filaments.



Figure S8

### Flowchart of the image analysis procedure

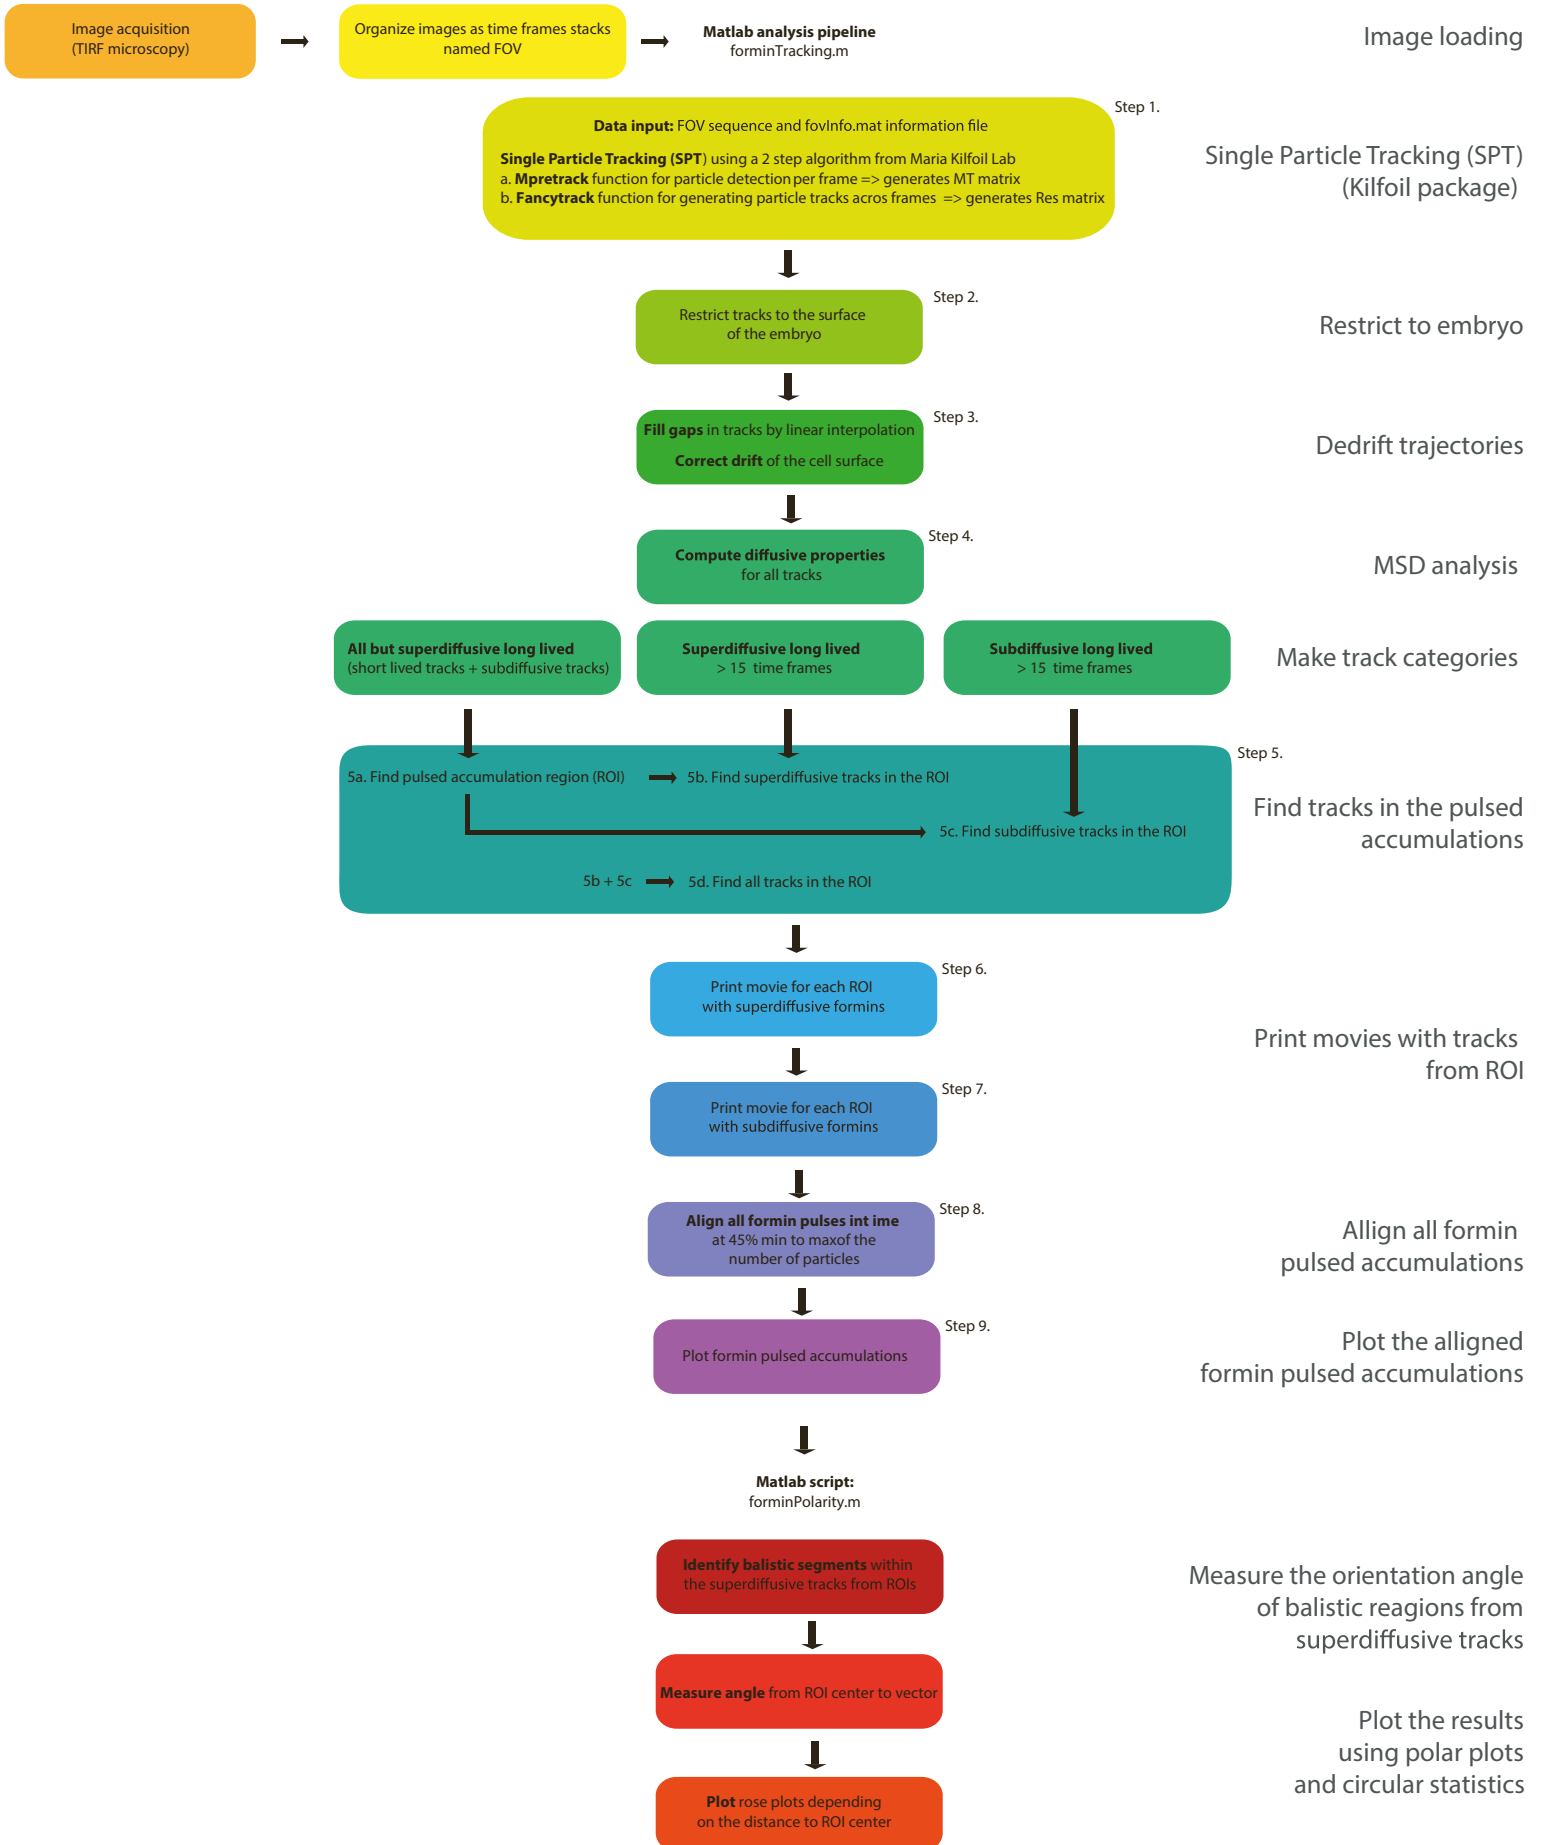

**Figure S8. Flowchart of image analysis pipeline for measuring formin trajectories mobility and their orientation during pulsed accumulations at the cortex. Related to STAR Methods.** All 9 steps are organized as code sections that include single particle tracking (SPT) using a previously published algorithm (Pelletier et al, 2009). Data is further on managed as a matrix, throughout further processing steps: (1) elimination of particles outside the cell cortex, (2) correction of the drift and the MSD analysis (3) separation of the different mobility classes of formins: superdiffusive/ballistic (active formins), subdiffusive/confined (activated formins). Short-lived and subdiffusive particles serve as support to define the adaptive region of interest (ROI) corresponding to each pulsed accumulation region of formins. Pulses are then aligned in time with respect to the threshold ratio between minimum (before) and the maximum number of particles during the pulse, set at 45%. This analysis sets the stage for synchronizing across pulses the time sequences of arrival of the different formin populations at the cell cortex. A second script is used to measure the orientation angle between (1) the displacement vector of the active formins and (2) a vector starting at the center of the ROI/pulse and ending on the starting point of displacement. To select superdiffusive tracks and account for shifts between superdiffusive and subdiffusive behavior, we first selected superdiffusive tracks based on  $\alpha$ , then for each timepoint in these tracks, we computed the ratio between start-to-end distance and travelled distance – equivalent to a straightness coefficient– over the 5 surrounding frames, and validated track regions for which the ratio was larger than an empirically determined threshold of 0.7 for more than 5 consecutive frames (250ms). Results are printed as rose plot using circular statistics toolbox (Berens, 2009). Images used in this analysis pipeline were obtained by near-TIRF microscopy at continuous 20 fps stream for 6000 frames, 16-bit, 512x512 pixels, saved as individual image sequences, and directly processed by the Matlab routine at the first step of the pipeline.

**Table S1: Statistical information supporting Fig. 2A,B, Costache, Prigent-Garcia, et al.**

|                   | number of embryos | number of tracks | mean   | median | high notch | low notch | std    |
|-------------------|-------------------|------------------|--------|--------|------------|-----------|--------|
| 1c interphase     | 6                 | 240              | 1.2497 | 1.2641 | 1.2869     | 1.2412    | 0.1764 |
| 1c mitosis        | 6                 | 240              | 1.272  | 1.2896 | 1.3102     | 1.2689    | 0.1626 |
| 1c cytokinesis    | 5                 | 170              | 1.0496 | 1.0716 | 1.105      | 1.0382    | 0.2222 |
| 2c AB interphase  | 7                 | 280              | 1.2413 | 1.2385 | 1.2617     | 1.2153    | 0.1933 |
| 2c AB mitosis     | 7                 | 168              | 1.1848 | 1.1794 | 1.211      | 1.1479    | 0.1756 |
| 2c AB cytokinesis | 5                 | 180              | 1.0442 | 1.026  | 1.0567     | 0.99534   | 0.1838 |
| 4c ABx interphase | 5                 | 190              | 1.1546 | 1.155  | 1.1801     | 1.13      | 0.1675 |
| 4c ABx mitosis    | 5                 | 185              | 1.2407 | 1.2506 | 1.2764     | 1.2248    | 0.1768 |
| 2c P1 interphase  | 7                 | 161              | 1.1795 | 1.178  | 1.2086     | 1.1475    | 0.1849 |
| 2c P1 mitosis     | 7                 | 161              | 1.2176 | 1.2204 | 1.2519     | 1.1889    | 0.1929 |

Table S1. Quantitative information describing the boxplots displayed in Fig. 2A-B, mean and std, values for median, high and low notch that are displayed on the boxplot.

**Table S2: Statistical information supporting Fig. 2A,B, Costache, Prigent-Garcia, et al.**

|                                     | paired | Two-sample<br>ttest speed<br>on tracks | Paired-<br>sample<br>ttest speed<br>on mean | Two-<br>sample<br>ttest speed<br>on mean |
|-------------------------------------|--------|----------------------------------------|---------------------------------------------|------------------------------------------|
| 1-cell interphase/ 1-cell mitosis   | y      | 0.1503                                 | 0.3676                                      | 0.5396                                   |
| 1c interphase/ 1c cytokinesis       |        | 9.92E-22                               |                                             | 0.0016                                   |
| 1c mitosis/ 1c cytokinesis          |        | 1.78E-27                               |                                             | 0.0013                                   |
| 2c AB interphase/ 2c AB mitosis     | y      | 0.0021                                 | 0.0082                                      | 0.3185                                   |
| 2c AB interphase/ 2c AB cytokinesis |        | 1.12E-24                               |                                             | 0.0091                                   |
| 2c AB mitosis/ 2c AB cytokinesis    |        | 2.19E-12                               |                                             | 0.0429                                   |
| 4c ABp interphase/ 4c ABp mitosis   | y      | 1.91E-06                               | 0.0328                                      | 0.0321                                   |
| 1c interphase/ 2c AB interphase     |        | 0.609                                  |                                             | 0.8609                                   |
| 2c AB interphase/ 4c ABp interphase |        | 6.99E-07                               |                                             | 0.0962                                   |
| 1c mitosis/ 2c AB mitosis           |        | 3.88E-07                               |                                             | 0.1                                      |
| 2c AB mitosis/ 4c ABp mitosis       |        | 0.0031                                 |                                             | 0.3138                                   |
| 1c cytokinesis/ 2c AB cytokinesis   |        | 0.8027                                 |                                             | 0.9341                                   |
|                                     |        |                                        |                                             |                                          |
|                                     |        |                                        |                                             |                                          |
|                                     |        |                                        |                                             |                                          |
| 2c P1 interphase/ 2c P1 mitosis     | y      | 0.071                                  | 0.4844                                      | 0.5465                                   |
| 2c AB interphase/ 2c P1 interphase  | y      | 0.0011                                 | 0.1845                                      | 0.2725                                   |
| 2c AB mitosis/ 2c P1 mitosis        | y      | 0.1066                                 | 0.1871                                      | 0.6054                                   |



Table S2. p-values for all statistical test performed on the data, y = yes. Paired sample t-test only performed when embryos have been captured and used for 2 stages, e.g. the samples are not independent.

**Table S3: List of strains used in Costache, Pirgent-Garcia, et al.**

| Strain name | Genotype                                                                                                     | Source                 |
|-------------|--------------------------------------------------------------------------------------------------------------|------------------------|
| N2          | Wild-type Bristol strain                                                                                     | CGC                    |
| EM302       | <i>mgSi5[cb-UNC-119 (+) GFP::ANI-1(AH+PH)]II; nmy-2(cp52[nmy-2::mKate2 + unc-119(+)] I; unc-119(ed3) III</i> | Michaux et al, 2018    |
| FBR104      | <i>cyk-1(jme06[cyk-1::mNeon])III</i>                                                                         | This study             |
| FBR106      | <i>cyk-1(jme06[cyk-1::mNeon])III; gesIs001[Pmex-5::Lifect::mKate::nmy-2UTR, unc-119+]</i>                    | This study             |
| FBR160      | <i>cyk-1(jme14[cyk-1::eGFP])III</i>                                                                          | This study             |
| FBR175      | <i>cyk-1(jme14[cyk-1::eGFP])III; nmy-2(cp52[nmy-2::mKate2 + unc-119(+)] I; unc-119(ed3) III</i>              | This study             |
| JH1541      | <i>unc-119(ed4); pJH7.03 [unc-119; pie-1:GFP:actin::pie-1 3' UTR]</i>                                        | Courtesy of G. Seydoux |
| LP229       | <i>nmy-2(cp52[nmy-2::mKate2 + LoxP unc-119(+) LoxP]) I; unc-119 (ed3) III</i>                                | Dickinson et al, 2017  |
| SWG001      | <i>gesIs001[Pmex-5::Lifect::mKate::nmy-2UTR, unc-119+]</i>                                                   | Reyman et al, 2016     |
| SWG282      | <i>gesIs008[Pcyk-1::CYK-1::GFP::cyk-1UTR, unc-119+]</i>                                                      | This study             |
|             |                                                                                                              |                        |

**Table S4.** List of parameters employed in the model. For some of the parameters, references are provided if the parameters were determined based on specific previous studies.

| Symbol                | Definition                                         | Value                                                 |
|-----------------------|----------------------------------------------------|-------------------------------------------------------|
| $r_{0,A}$             | Length of an actin segment                         | $1.4 \times 10^{-7}$ [m]                              |
| $r_{c,A}$             | Diameter of an actin segment                       | $7.0 \times 10^{-9}$ [m] (Kishino and Yanagida, 1988) |
| $\theta_{0,A}$        | Bending angle formed by adjacent actin segments    | 0 [rad]                                               |
| $\kappa_{s,A}$        | Extensional stiffness of F-actin                   | $1.69 \times 10^{-2}$ [N/m]                           |
| $\kappa_{b,A}$        | Bending stiffness of F-actin                       | $2.64 \times 10^{-19}$ [N·m] (Isambert et al, 1995)   |
| $r_{0,ACP}$           | Length of an ACP arm                               | $2.35 \times 10^{-8}$ [m] (Meyer and Aebi, 1990)      |
| $r_{c,ACP}$           | Diameter of an ACP arm                             | $1.0 \times 10^{-8}$ [m]                              |
| $\theta_{0,ACP}$      | Bending angle formed by two ACP arms               | 0 [rad]                                               |
| $\kappa_{s,ACP}$      | Extensional stiffness of ACP                       | $2.0 \times 10^{-3}$ [N/m]                            |
| $\kappa_{b,ACP}$      | Bending stiffness of ACP                           | $1.04 \times 10^{-19}$ [N·m]                          |
| $r_{0,M1}$            | Length of a motor backbone segment                 | $4.2 \times 10^{-8}$ [m]                              |
| $r_{0,M2}$            | Length of a motor arm                              | $1.35 \times 10^{-8}$ [m]                             |
| $r_{c,M}$             | Diameter of a motor arm                            | $1.0 \times 10^{-8}$ [m]                              |
| $\theta_{0,M}$        | Bending angle formed by motor backbone segments    | 0 [rad]                                               |
| $\kappa_{s,M1}$       | Extensional stiffness of a motor backbone          | $1.69 \times 10^{-2}$ [N/m]                           |
| $\kappa_{s,M2}$       | Extensional stiffness 1 of a motor arm             | $1.0 \times 10^{-3}$ [N/m]                            |
| $\kappa_{s,M3}$       | Extensional stiffness 2 of a motor arm             | $1.0 \times 10^{-3}$ [N/m]                            |
| $\kappa_{b,M}$        | Bending stiffness of a motor backbone              | $5.07 \times 10^{-18}$ [N·m]                          |
| $N_h$                 | Number of heads represented by a motor arm         | 4                                                     |
| $N_a$                 | Number of arms per motor                           | 8                                                     |
| $k_{n,A}$             | Nucleation rate of actin                           | $0.001$ [ $\mu\text{M}^{-1}\text{s}^{-1}$ ]           |
| $k_{p,A}$             | Polymerization rate of actin at the barbed end     | $5$ [ $\mu\text{M}^{-1}\text{s}^{-1}$ ]               |
| $k_{d,A}$             | Depolymerization rate of actin at the pointed end  | $50$ [ $\text{s}^{-1}$ ]                              |
| $k_{u,ACP}^0$         | Zero-force unbinding rate constant of ACP          | $0.115$ [ $\text{s}^{-1}$ ] (Ferrer et al, 2008)      |
| $x_{u,ACP}$           | Sensitivity of ACP unbinding to applied force      | $1.04 \times 10^{-10}$ [m] (Ferrer et al, 2008)       |
| $\kappa_f$            | Strength of repulsive force                        | $1.69 \times 10^{-3}$ [N/m]                           |
| $\Delta t$            | Time step                                          | $1.15 \times 10^{-5}$ [s]                             |
| $\mu$                 | Viscosity of surrounding medium                    | $8.6 \times 10^{-1}$ [kg/m·s]                         |
| $k_B T$               | Thermal energy                                     | $4.142 \times 10^{-21}$ [J]                           |
| $C_A$                 | Actin concentration                                | 200 [ $\mu\text{M}$ ]                                 |
| $R_M$                 | Ratio of myosin concentration to $C_A$             | 0.08                                                  |
| $R_{ACP}$             | Ratio of ACP concentration to $C_A$                | 0.01                                                  |
| $\langle L_f \rangle$ | Average length of F-actins                         | $\sim 1$ [ $\mu\text{m}$ ]                            |
| $\rho_f$              | Enhancement factor for faster actin polymerization | 10                                                    |
| $\tau_f$              | Duration of faster actin polymerization            | 10 s                                                  |
| $d_M$                 | Time delay of myosin activation                    | 5 s                                                   |
| $\tau_M$              | Duration of myosin activation                      | 15 s                                                  |

**Table S5. Sequence information regarding endogenous *cyk-1::GFP* CRISPR knock-in.  
Related to STAR Methods.**

**Table S5. Sequence information regarding endogenous *cyk-1::GFP* CRISPR knock-in.**

*cyk-1* (wild-type), with 500 bp flanks, Stop codon is highlighted in RED and bolded

```
GAAGACTTGGAGGAGGACTTGATCGGCAAAGATCACGACATCAGAATGCTTTGGGTCAGCTT
CAAGATCTCACTGGCTGCGCATCGGAACCGGTTCTTTCCGGACAGTTTGCTCGATCACGCAA
CGTTCCTCAAAATGATCTGCAACGACAAAATATGGAACCTCCATCATCAGTAAAACCAACAA
CGGCGCTTGATAGGGCTAAAGCATTGGAGTTGGATTGCCGATTGGTCAGAATGAGCTCAAA
GTTCGAGTGAGAAGGAAAGGGCAACCAGCTGTTCCAgttacggtaacatatattttatatgtgg
aaacttttcgaaatttaactttcagAATATCAATGGAACATCGCAAATCTCACCAACGCACA
AAGAAAACGATCCGACGGGTTCTCGTCAACTTCATCTGGTCCTGCATCATCAAACACGGCT
ACATCATCATCATCAGGCACAGTGGTGCCATCAACAGACGATCTTCTCGCACGTCTTAATGA
TTTCTGAaagctcacatcggttgtcttatctatagatctagtcattctcgcgtctctatTTTT
tctgtattattgccacatttttcatactttaattgtcattcacagggtcctcttctcgttc
catttcaattgctcgttgatattttcatcagttcacttttcctttctatTTTcttttaggtaa
tattttgagtttaaaaacgattttatttttattgacatggaacacaggcatactttaccgga
gacattcaaaagtgaaatagaagaaatgcattagatgagctgaattcgtagtgtgaagtgcac
gagacaatgcttcgctcggataccagtatttcttcgccatcgctaacaagatctttcatcgaa
gtatgcagattttctttgctttcttgttcaaatgtggcatgaaactgctaatacagtaaag
ttttcgagttgaggtcgctagtgtcggatgtttgagatggctgaaatttgaaatttgTTTTc
taaaacaaacg
```

SG sequence with PAM

Silent mutation incorporated region

*cyk-1* Repair template (GFP knock-in at c-terminal before stop codon), with 500 bp flanks, Stop codon is highlighted in RED and bolded

```
GAAGACTTGGAGGAGGACTTGATCGGCAAAGATCACGACATCAGAATGCTTTGGGTCAGCTT
CAAGATCTCACTGGCTGCGCATCGGAACCGGTTCTTTCCGGACAGTTTGCTCGATCACGCAA
CGTTCCTCAAAATGATCTGCAACGACAAAATATGGAACCTCCATCATCAGTAAAACCAACAA
CGGCGCTTGATAGGGCTAAAGCATTGGAGTTGGATTGCCGATTGGTCAGAATGAGCTCAAA
GTTCGAGTGAGAAGGAAAGGGCAACCAGCTGTTCCAgttacggtaacatatattttatatgtgg
aaacttttcgaaatttaactttcagAATATCAATGGAACATCGCAAATCTCACCAACGCACA
AAGAAAACGATCCGACGGGTTCTCGTCAACTTCATCTGGTCCTGCATCATCAAACACGGCT
ACATCATCATCATCAGGCACAGTCGTACCTTCTACTGATGATTTATTGGCTAGACTTAACGA
CTTTACCAGTGGTAGCGGCTCCAAGGGAGAGGAGCTTTCACCGGAGTCGTCCCAATCCTCG
TCGAGCTCGACGGAGACGTCAACGGACACAAGTTCTCCGTCTCAGGAGAGGGAGAGGGAGAC
GCCACCTACGGAAAGCTCACCTCAAGTTCATCTGCACCACCGGAAAGCTCCCAGTCCCATG
GCCAACCTCGTCACCACCTTCACTTACGGAGTCCAATGCTTCTCCCGTTACCCAGACCACA
TGAAGCGTCACGACTTCTTCAAGTCCGCCATGCCAGAGGGATACGTCCAAGAGCGTACCATC
TTCTTCAAGgtaagtttaaacattaattaactaactaaccctgattatttaattttcag
```



GACGACGGAAACTACAAGACCCGTGCCGAGGTCAAGTTCGAGGGAGACACCCTCGTCAACCG  
TATCGAGCTCAAGgtaagtttaaacagttcggtactaactaaccatacatatttaattttc  
agGGAATCGACTTCAAGGAGGACGGAAACATCCTCGGACACAAGCTCGAATACAACACTACAAC  
TCCCACAACGTCTACATCATGGCCGACAAGCAAAGAACGGAATCAAGGTCAACTTCAAGgt  
aagtttaaacatgattttactaactaactaatctgatttaattttcagATCCGTCACAACA  
TCGAGGACGGATCTGTCCAACCTCGCCGACCACTACCAACAAAACACCCCAATCGGAGACGGA  
CCAGTCCTCCTCCCAGACAACCACTACCTCTCCACCCAATCCGCCCTCTCCAAGGACCCAAA  
CGAGAAGCGTGACCACATGGTCCTCAAGGAGTTCGTCACCCGCTGCCGGAATCACCCACGGAA  
TGGACGAGCTCTACAAGTGAaagctcacatcggttgcttcttatctatagatctagtcattctc  
cgtctctatTTTTTctgtattattgccacatttttcatactttaattgtcattcacagggtc  
cctcttctcgttccatttcaattgctcgttgattttcatcagttcacttttcctttctatt  
ttcttttaggtaaataattttgagtttaaaaacgattttatttttattgacatggaacacaggc  
atactttacccgagacattcaaaagtgaatagaagaatgcattagatgagctgaattcgt  
agtgtaagtgcacgagacaatgcttcgctcggataccagatatttcttcgccatcgtaacaag  
atctttcatcgaagtatgcagattttctttgctttcttgttcaaattgtggcatgaaactgc  
taatacagtaaagttttcgagttgaggtcgctagtgctcggatgtttgagatggctgaaattt  
gaaatttgTTTTtctaaaacaaacg

SG sequence

Silent mutation incorporated region in the repair template

Linker sequence prior to GFP

The GFP sequence is shown in Green

Silent mutations are highlighted in Red with respect of wild-type sequence, and incorporated in the repair template:

Wild-type PAM downstream.ape from 1 to 44

Alignment to

Repair template PAM downstream.ape-- Matches:28; Mismatches:

```
          *           *           *           *  
1>TGGTGCCATCAACAGACGATCTTCTCGCACGTCTTAATGATTTTC>44  
1>TCGTACCTTCTACTGATGATTATTCGCTAGACTTAACGACTTT>44
```
